# Supplementary material
Source: publisher figshare collection journal article supplement (https://acs.figshare.com/ndownloader/files/5161807)

## Supporting Information for:

### Porphyrin Architectures Tailored for Studies of Molecular Information Storage

Carole M. Carcel, Joydev K. Laha, Robert S. Loewe, Patchanita Thamyongkit, Karl-Heinz Schweikart, Veena Misra, David F. Bocian, and Jonathan S. Lindsey

#### Table of Contents:

|                       |          |
|-----------------------|----------|
| Experimental Section  | S1 – S1  |
| Characterization Data | S2 – S62 |

#### Experimental Section

**General.** All  $^1\text{H}$  NMR spectra (300 or 400 MHz) and  $^{13}\text{C}$  NMR (75 MHz) were collected in  $\text{CDCl}_3$  unless noted otherwise. Absorption and fluorescence spectra were collected in toluene at room temperature. Mass spectra of porphyrins were obtained via laser desorption mass spectrometry (LD-MS) without a matrix<sup>32</sup> or by matrix-assisted laser desorption ionization mass spectrometry (MALDI-MS), and by high-resolution fast atom bombardment mass spectrometry (FAB-MS) using a matrix of nitrobenzyl alcohol and polyethylene glycol. Melting points are uncorrected. Kugelrohr distillation was performed by a standard-size Kugelrohr short path distillation apparatus. Silica gel (40  $\mu\text{m}$  average particle size) was used for column chromatography. All GC chromatograms were collected using a phenyl methyl siloxane column (30.0 m x 32  $\mu\text{m}$  x 0.5  $\mu\text{m}$ ), thermal programming (oven at 35  $^\circ\text{C}$  for 5 min; ramp to 325  $^\circ\text{C}$  at 10  $^\circ\text{C}/\text{min}$ ; oven at 325  $^\circ\text{C}$  for 5 min), and a flame ionization detector.<sup>29</sup> THF was freshly distilled from sodium as required. Toluene was distilled from  $\text{CaH}_2$ .  $\text{CHCl}_3$  was stabilized with 0.8% ethanol.

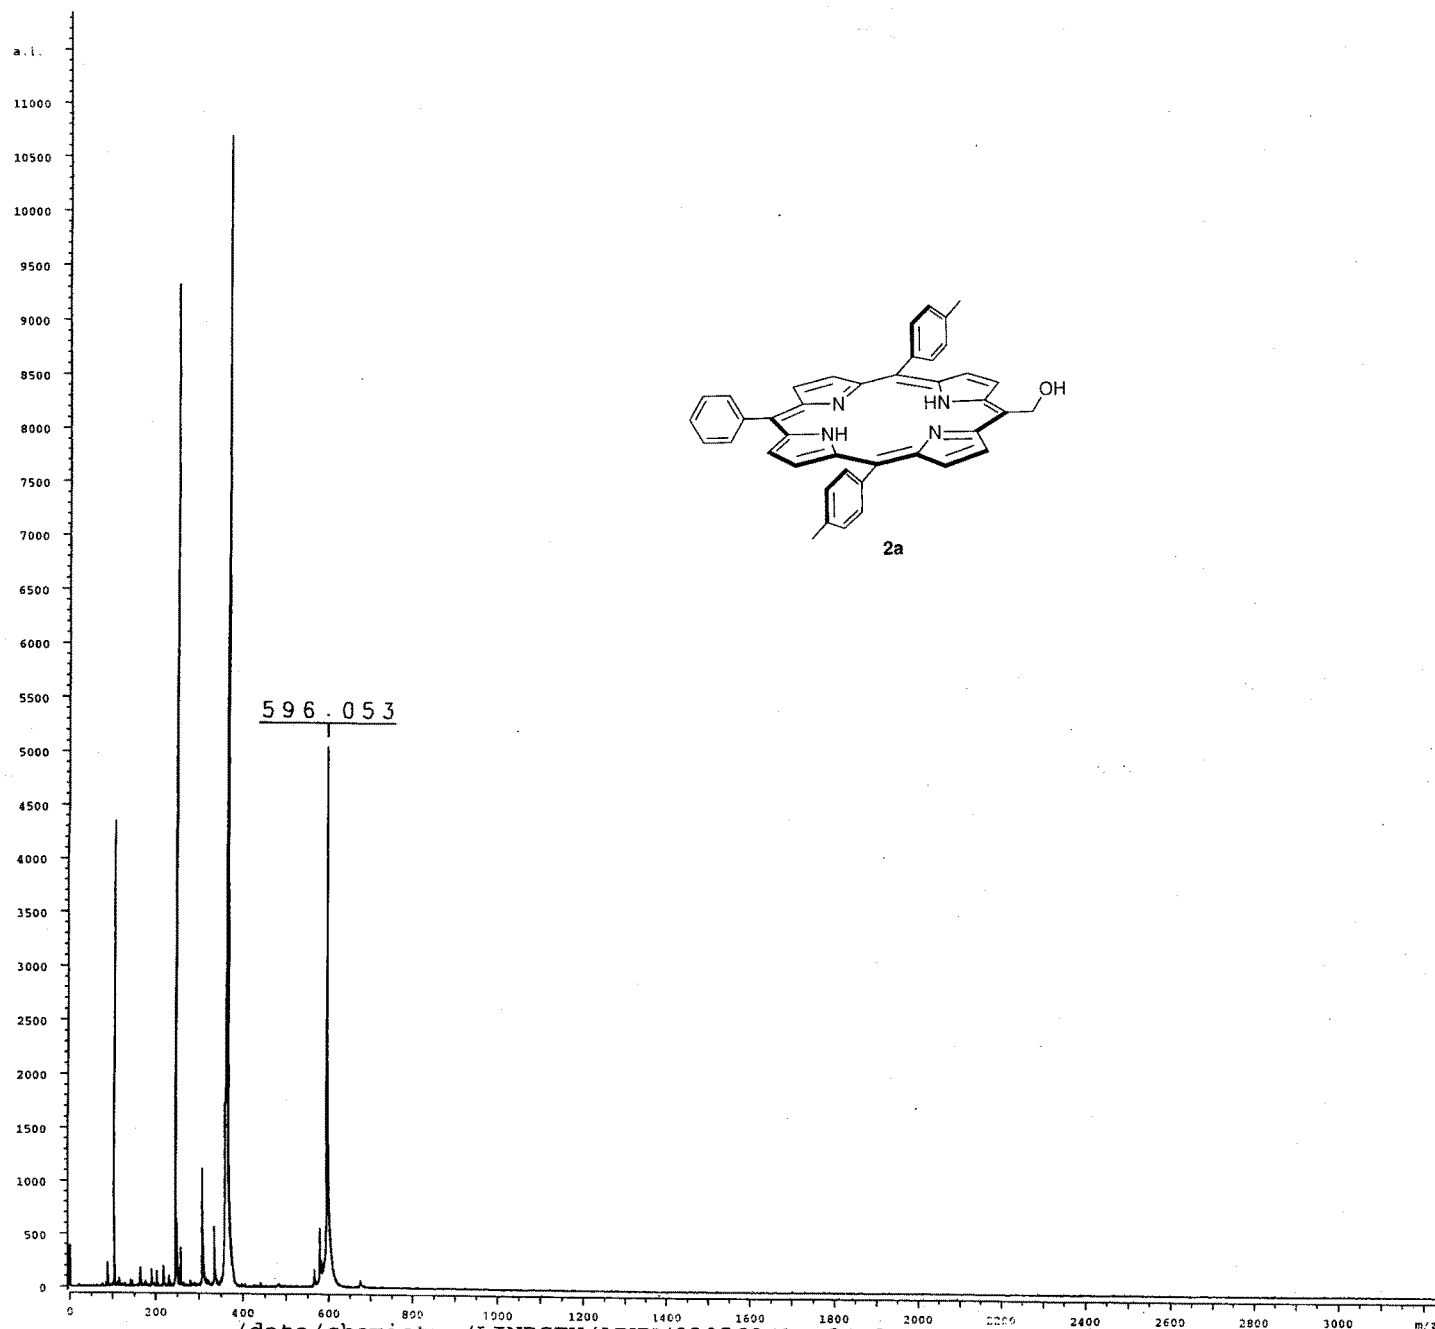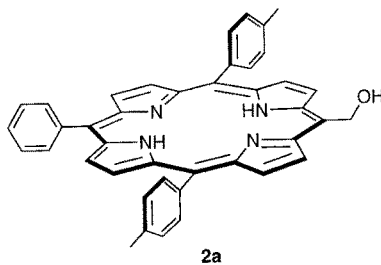

```

INSTRUM TOP
OpId N. Srinivasan
SMPNAM 030560
AQ_DATE Thu Sep 4 10:42:26 2003
PATH /data/chemistry/LINDSEY/ARUN
POLARI POS
AQOP_m Reflector
TD 40000
NoSHOTS 42
SNOPT1 0
SNOPT2 0
SNOPT3 0
DW 1.00 (ns)
DELAY 0 (ns)
Vis1 20.00 (kV)
Vis2 18.70 (kV)
Uref1 0.00 (kV)
Uref2 0.00 (kV)
Uref3 0.00 (kV)
Uref4 0.00 (kV)
Uref5 0.00 (kV)
Uref6 0.00 (kV)
Uref7 0.00 (kV)
Uref8 0.00 (kV)
Uref9 0.00 (kV)
Uref10 0.00 (kV)
Uref11 0.00 (kV)
Uref12 0.00 (kV)
Uref13 0.00 (kV)
Uref14 0.00 (kV)
Uref15 0.00 (kV)
Uref16 0.00 (kV)
Uref17 0.00 (kV)
Uref18 0.00 (kV)
Uref19 0.00 (kV)
Uref20 0.00 (kV)
Uref21 0.00 (kV)
Uref22 0.00 (kV)
Uref23 0.00 (kV)
Uref24 0.00 (kV)
Uref25 0.00 (kV)
Uref26 0.00 (kV)
Uref27 0.00 (kV)
Uref28 0.00 (kV)
Uref29 0.00 (kV)
Uref30 0.00 (kV)
Uref31 0.00 (kV)
Uref32 0.00 (kV)
Uref33 0.00 (kV)
Uref34 0.00 (kV)
Uref35 0.00 (kV)
Uref36 0.00 (kV)
Uref37 0.00 (kV)
Uref38 0.00 (kV)
Uref39 0.00 (kV)
Uref40 0.00 (kV)
Uref41 0.00 (kV)
Uref42 0.00 (kV)
Uref43 0.00 (kV)
Uref44 0.00 (kV)
Uref45 0.00 (kV)
Uref46 0.00 (kV)
Uref47 0.00 (kV)
Uref48 0.00 (kV)
Uref49 0.00 (kV)
Uref50 0.00 (kV)
Uref51 0.00 (kV)
Uref52 0.00 (kV)
Uref53 0.00 (kV)
Uref54 0.00 (kV)
Uref55 0.00 (kV)
Uref56 0.00 (kV)
Uref57 0.00 (kV)
Uref58 0.00 (kV)
Uref59 0.00 (kV)
Uref60 0.00 (kV)
Uref61 0.00 (kV)
Uref62 0.00 (kV)
Uref63 0.00 (kV)
Uref64 0.00 (kV)
Uref65 0.00 (kV)
Uref66 0.00 (kV)
Uref67 0.00 (kV)
Uref68 0.00 (kV)
Uref69 0.00 (kV)
Uref70 0.00 (kV)
Uref71 0.00 (kV)
Uref72 0.00 (kV)
Uref73 0.00 (kV)
Uref74 0.00 (kV)
Uref75 0.00 (kV)
Uref76 0.00 (kV)
Uref77 0.00 (kV)
Uref78 0.00 (kV)
Uref79 0.00 (kV)
Uref80 0.00 (kV)
Uref81 0.00 (kV)
Uref82 0.00 (kV)
Uref83 0.00 (kV)
Uref84 0.00 (kV)
Uref85 0.00 (kV)
Uref86 0.00 (kV)
Uref87 0.00 (kV)
Uref88 0.00 (kV)
Uref89 0.00 (kV)
Uref90 0.00 (kV)
Uref91 0.00 (kV)
Uref92 0.00 (kV)
Uref93 0.00 (kV)
Uref94 0.00 (kV)
Uref95 0.00 (kV)
Uref96 0.00 (kV)
Uref97 0.00 (kV)
Uref98 0.00 (kV)
Uref99 0.00 (kV)
Uref100 0.00 (kV)
Uref101 0.00 (kV)
Uref102 0.00 (kV)
Uref103 0.00 (kV)
Uref104 0.00 (kV)
Uref105 0.00 (kV)
Uref106 0.00 (kV)
Uref107 0.00 (kV)
Uref108 0.00 (kV)
Uref109 0.00 (kV)
Uref110 0.00 (kV)
Uref111 0.00 (kV)
Uref112 0.00 (kV)
Uref113 0.00 (kV)
Uref114 0.00 (kV)
Uref115 0.00 (kV)
Uref116 0.00 (kV)
Uref117 0.00 (kV)
Uref118 0.00 (kV)
Uref119 0.00 (kV)
Uref120 0.00 (kV)
Uref121 0.00 (kV)
Uref122 0.00 (kV)
Uref123 0.00 (kV)
Uref124 0.00 (kV)
Uref125 0.00 (kV)
Uref126 0.00 (kV)
Uref127 0.00 (kV)
Uref128 0.00 (kV)
Uref129 0.00 (kV)
Uref130 0.00 (kV)
Uref131 0.00 (kV)
Uref132 0.00 (kV)
Uref133 0.00 (kV)
Uref134 0.00 (kV)
Uref135 0.00 (kV)
Uref136 0.00 (kV)
Uref137 0.00 (kV)
Uref138 0.00 (kV)
Uref139 0.00 (kV)
Uref140 0.00 (kV)
Uref141 0.00 (kV)
Uref142 0.00 (kV)
Uref143 0.00 (kV)
Uref144 0.00 (kV)
Uref145 0.00 (kV)
Uref146 0.00 (kV)
Uref147 0.00 (kV)
Uref148 0.00 (kV)
Uref149 0.00 (kV)
Uref150 0.00 (kV)
Uref151 0.00 (kV)
Uref152 0.00 (kV)
Uref153 0.00 (kV)
Uref154 0.00 (kV)
Uref155 0.00 (kV)
Uref156 0.00 (kV)
Uref157 0.00 (kV)
Uref158 0.00 (kV)
Uref159 0.00 (kV)
Uref160 0.00 (kV)
Uref161 0.00 (kV)
Uref162 0.00 (kV)
Uref163 0.00 (kV)
Uref164 0.00 (kV)
Uref165 0.00 (kV)
Uref166 0.00 (kV)
Uref167 0.00 (kV)
Uref168 0.00 (kV)
Uref169 0.00 (kV)
Uref170 0.00 (kV)
Uref171 0.00 (kV)
Uref172 0.00 (kV)
Uref173 0.00 (kV)
Uref174 0.00 (kV)
Uref175 0.00 (kV)
Uref176 0.00 (kV)
Uref177 0.00 (kV)
Uref178 0.00 (kV)
Uref179 0.00 (kV)
Uref180 0.00 (kV)
Uref181 0.00 (kV)
Uref182 0.00 (kV)
Uref183 0.00 (kV)
Uref184 0.00 (kV)
Uref185 0.00 (kV)
Uref186 0.00 (kV)
Uref187 0.00 (kV)
Uref188 0.00 (kV)
Uref189 0.00 (kV)
Uref190 0.00 (kV)
Uref191 0.00 (kV)
Uref192 0.00 (kV)
Uref193 0.00 (kV)
Uref194 0.00 (kV)
Uref195 0.00 (kV)
Uref196 0.00 (kV)
Uref197 0.00 (kV)
Uref198 0.00 (kV)
Uref199 0.00 (kV)
Uref200 0.00 (kV)
Uref201 0.00 (kV)
Uref202 0.00 (kV)
Uref203 0.00 (kV)
Uref204 0.00 (kV)
Uref205 0.00 (kV)
Uref206 0.00 (kV)
Uref207 0.00 (kV)
Uref208 0.00 (kV)
Uref209 0.00 (kV)
Uref210 0.00 (kV)
Uref211 0.00 (kV)
Uref212 0.00 (kV)
Uref213 0.00 (kV)
Uref214 0.00 (kV)
Uref215 0.00 (kV)
Uref216 0.00 (kV)
Uref217 0.00 (kV)
Uref218 0.00 (kV)
Uref219 0.00 (kV)
Uref220 0.00 (kV)
Uref221 0.00 (kV)
Uref222 0.00 (kV)
Uref223 0.00 (kV)
Uref224 0.00 (kV)
Uref225 0.00 (kV)
Uref226 0.00 (kV)
Uref227 0.00 (kV)
Uref228 0.00 (kV)
Uref229 0.00 (kV)
Uref230 0.00 (kV)
Uref231 0.00 (kV)
Uref232 0.00 (kV)
Uref233 0.00 (kV)
Uref234 0.00 (kV)
Uref235 0.00 (kV)
Uref236 0.00 (kV)
Uref237 0.00 (kV)
Uref238 0.00 (kV)
Uref239 0.00 (kV)
Uref240 0.00 (kV)
Uref241 0.00 (kV)
Uref242 0.00 (kV)
Uref243 0.00 (kV)
Uref244 0.00 (kV)
Uref245 0.00 (kV)
Uref246 0.00 (kV)
Uref247 0.00 (kV)
Uref248 0.00 (kV)
Uref249 0.00 (kV)
Uref250 0.00 (kV)
Uref251 0.00 (kV)
Uref252 0.00 (kV)
Uref253 0.00 (kV)
Uref254 0.00 (kV)
Uref255 0.00 (kV)
Uref256 0.00 (kV)
Uref257 0.00 (kV)
Uref258 0.00 (kV)
Uref259 0.00 (kV)
Uref260 0.00 (kV)
Uref261 0.00 (kV)
Uref262 0.00 (kV)
Uref263 0.00 (kV)
Uref264 0.00 (kV)
Uref265 0.00 (kV)
Uref266 0.00 (kV)
Uref267 0.00 (kV)
Uref268 0.00 (kV)
Uref269 0.00 (kV)
Uref270 0.00 (kV)
Uref271 0.00 (kV)
Uref272 0.00 (kV)
Uref273 0.00 (kV)
Uref274 0.00 (kV)
Uref275 0.00 (kV)
Uref276 0.00 (kV)
Uref277 0.00 (kV)
Uref278 0.00 (kV)
Uref279 0.00 (kV)
Uref280 0.00 (kV)
Uref281 0.00 (kV)
Uref282 0.00 (kV)
Uref283 0.00 (kV)
Uref284 0.00 (kV)
Uref285 0.00 (kV)
Uref286 0.00 (kV)
Uref287 0.00 (kV)
Uref288 0.00 (kV)
Uref289 0.00 (kV)
Uref290 0.00 (kV)
Uref291 0.00 (kV)
Uref292 0.00 (kV)
Uref293 0.00 (kV)
Uref294 0.00 (kV)
Uref295 0.00 (kV)
Uref296 0.00 (kV)
Uref297 0.00 (kV)
Uref298 0.00 (kV)
Uref299 0.00 (kV)
Uref300 0.00 (kV)
Uref301 0.00 (kV)
Uref302 0.00 (kV)
Uref303 0.00 (kV)
Uref304 0.00 (kV)
Uref305 0.00 (kV)
Uref306 0.00 (kV)
Uref307 0.00 (kV)
Uref308 0.00 (kV)
Uref309 0.00 (kV)
Uref310 0.00 (kV)
Uref311 0.00 (kV)
Uref312 0.00 (kV)
Uref313 0.00 (kV)
Uref314 0.00 (kV)
Uref315 0.00 (kV)
Uref316 0.00 (kV)
Uref317 0.00 (kV)
Uref318 0.00 (kV)
Uref319 0.00 (kV)
Uref320 0.00 (kV)
Uref321 0.00 (kV)
Uref322 0.00 (kV)
Uref323 0.00 (kV)
Uref324 0.00 (kV)
Uref325 0.00 (kV)
Uref326 0.00 (kV)
Uref327 0.00 (kV)
Uref328 0.00 (kV)
Uref329 0.00 (kV)
Uref330 0.00 (kV)
Uref331 0.00 (kV)
Uref332 0.00 (kV)
Uref333 0.00 (kV)
Uref334 0.00 (kV)
Uref335 0.00 (kV)
Uref336 0.00 (kV)
Uref337 0.00 (kV)
Uref338 0.00 (kV)
Uref339 0.00 (kV)
Uref340 0.00 (kV)
Uref341 0.00 (kV)
Uref342 0.00 (kV)
Uref343 0.00 (kV)
Uref344 0.00 (kV)
Uref345 0.00 (kV)
Uref346 0.00 (kV)
Uref347 0.00 (kV)
Uref348 0.00 (kV)
Uref349 0.00 (kV)
Uref350 0.00 (kV)
Uref351 0.00 (kV)
Uref352 0.00 (kV)
Uref353 0.00 (kV)
Uref354 0.00 (kV)
Uref355 0.00 (kV)
Uref356 0.00 (kV)
Uref357 0.00 (kV)
Uref358 0.00 (kV)
Uref359 0.00 (kV)
Uref360 0.00 (kV)
Uref361 0.00 (kV)
Uref362 0.00 (kV)
Uref363 0.00 (kV)
Uref364 0.00 (kV)
Uref365 0.00 (kV)
Uref366 0.00 (kV)
Uref367 0.00 (kV)
Uref368 0.00 (kV)
Uref369 0.00 (kV)
Uref370 0.00 (kV)
Uref371 0.00 (kV)
Uref372 0.00 (kV)
Uref373 0.00 (kV)
Uref374 0.00 (kV)
Uref375 0.00 (kV)
Uref376 0.00 (kV)
Uref377 0.00 (kV)
Uref378 0.00 (kV)
Uref379 0.00 (kV)
Uref380 0.00 (kV)
Uref381 0.00 (kV)
Uref382 0.00 (kV)
Uref383 0.00 (kV)
Uref384 0.00 (kV)
Uref385 0.00 (kV)
Uref386 0.00 (kV)
Uref387 0.00 (kV)
Uref388 0.00 (kV)
Uref389 0.00 (kV)
Uref390 0.00 (kV)
Uref391 0.00 (kV)
Uref392 0.00 (kV)
Uref393 0.00 (kV)
Uref394 0.00 (kV)
Uref395 0.00 (kV)
Uref396 0.00 (kV)
Uref397 0.00 (kV)
Uref398 0.00 (kV)
Uref399 0.00 (kV)
Uref400 0.00 (kV)
Uref401 0.00 (kV)
Uref402 0.00 (kV)
Uref403 0.00 (kV)
Uref404 0.00 (kV)
Uref405 0.00 (kV)
Uref406 0.00 (kV)
Uref407 0.00 (kV)
Uref408 0.00 (kV)
Uref409 0.00 (kV)
Uref410 0.00 (kV)
Uref411 0.00 (kV)
Uref412 0.00 (kV)
Uref413 0.00 (kV)
Uref414
```

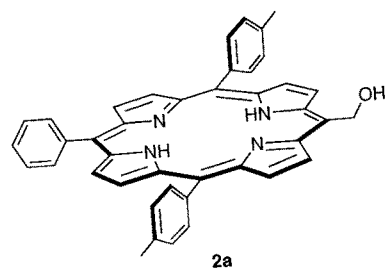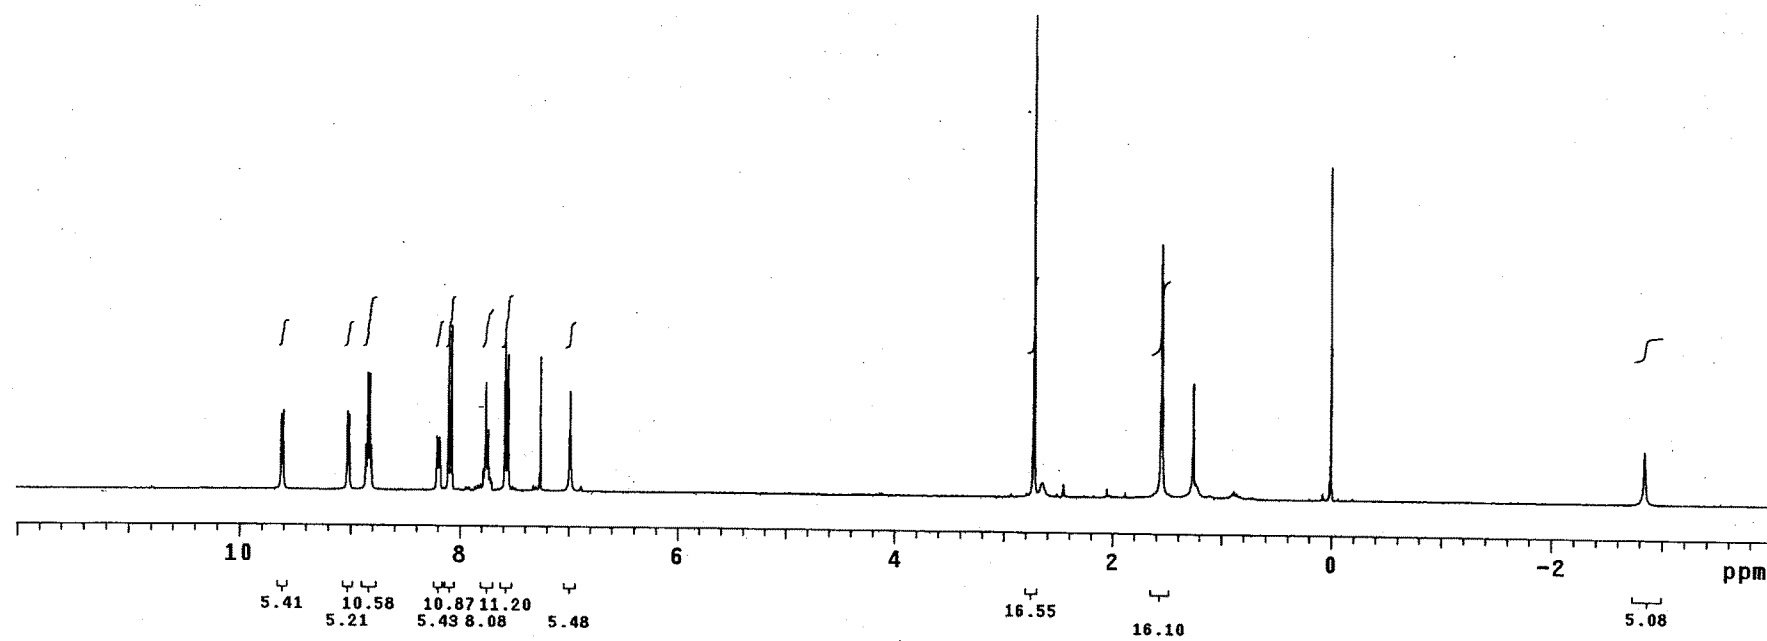

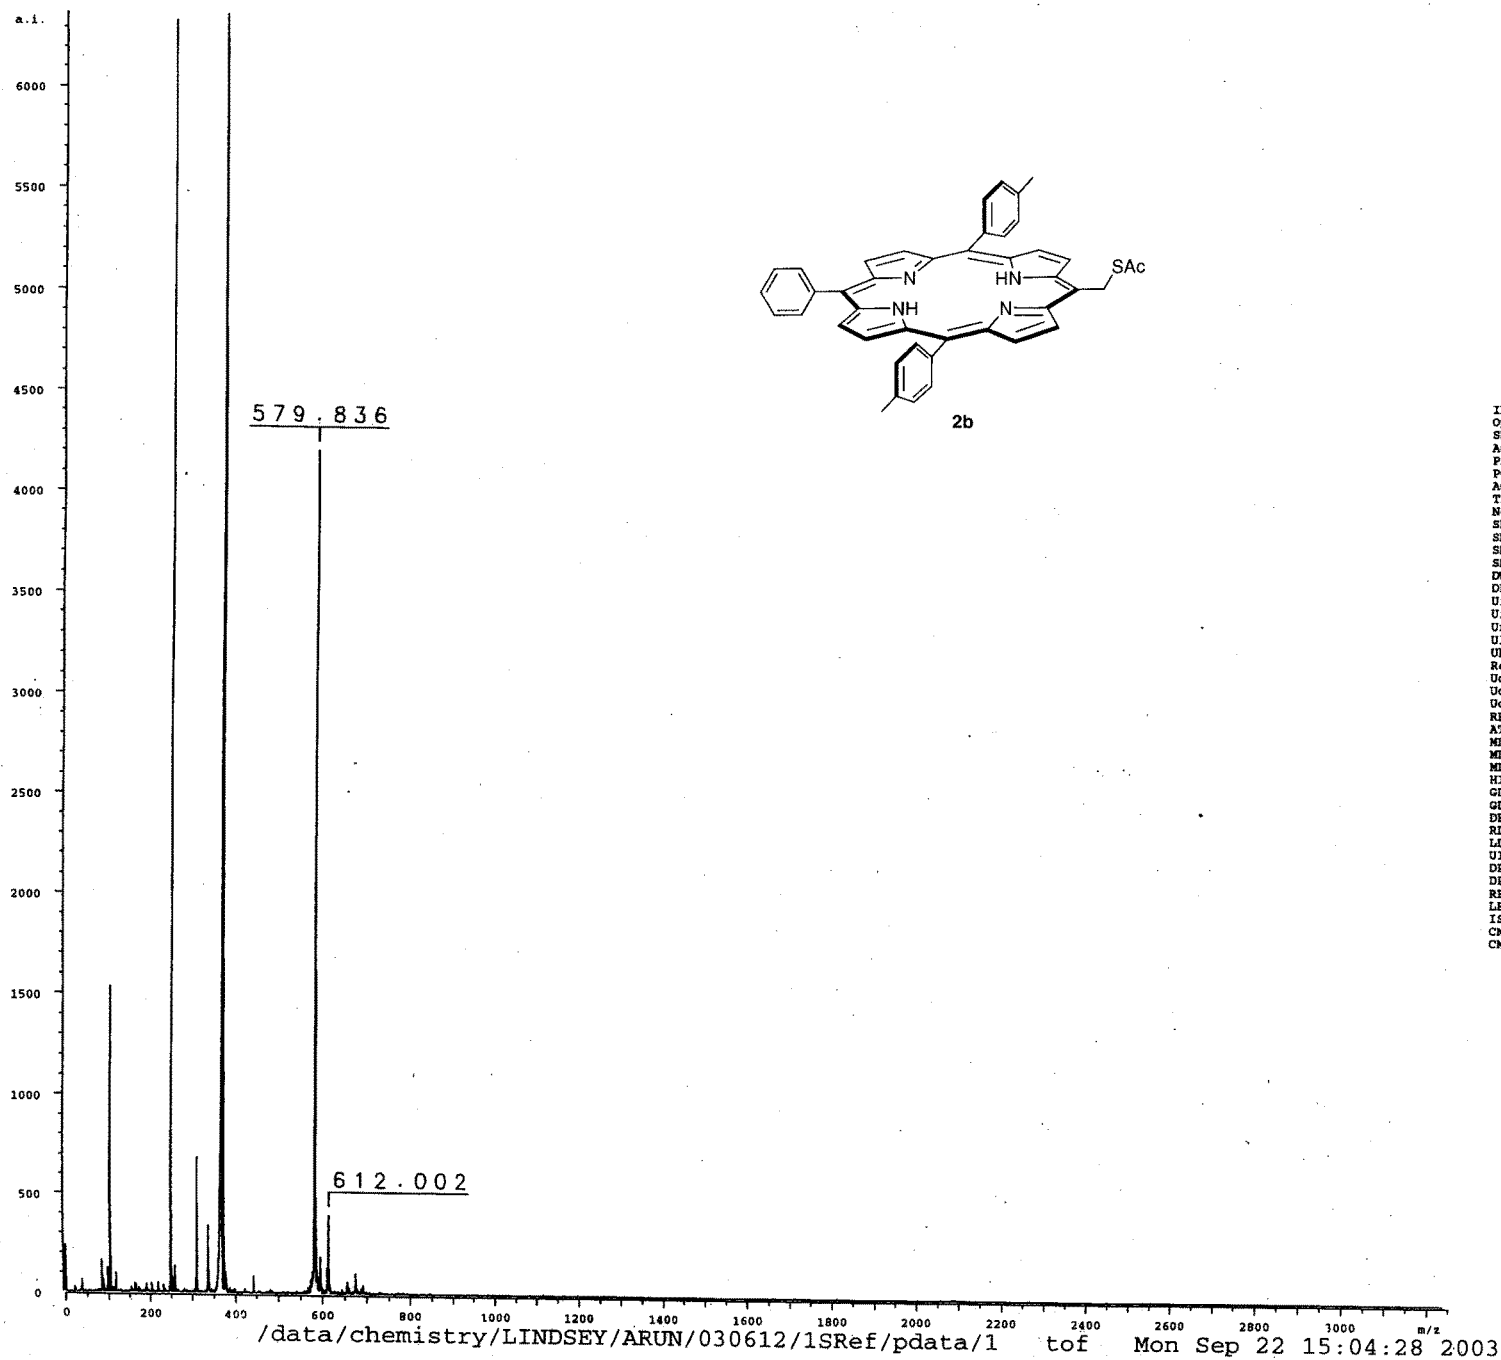

INSTRUM TOF  
OpId N. Srinivasan  
SMPNAM 030612  
AQ\_DATE Mon Sep 22 15:03:55 2003  
PATH /data/chemistry/LINDSEY/ARUN  
POLARI POS  
AQOP\_m Reflector  
TD 40000  
NoSHOTS 25  
SNCNUM 0  
SMOPTS1 0  
SMOPTS2 0  
SMOPTS3 0  
DW 1.00 [ns]  
DELAY 0 [ns]  
Uis1 20.00 [kV]  
Uis2 18.70 [kV]  
Uref1 0.00 [kV]  
Ulen3 7.50 [kV]  
Ulimass 10.00 [kV]  
RefPull 0.00 [kV]  
UdetL 1.50 [kV]  
UdetR 0.00 [kV]  
Udef1 2.00 [kV]  
REFPHZ 1.00 [Hz]  
ATTEN 38.0  
ML1 2067125.193  
ML2 333.982  
ML3 0.000  
HITURBO no  
GDEON yes  
GDEDL short  
DEFLON no  
RLASBND no  
LINSBND no  
UIS2BND no  
DPCAL1 510.84  
DPMAS 700.00 [Da]  
RENDVAL 0.33  
LRENDVAL 0.28  
IS2BNDV 0.91  
CMT1 por2 SAC-fb  
CMT2

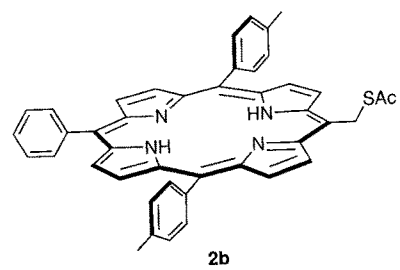

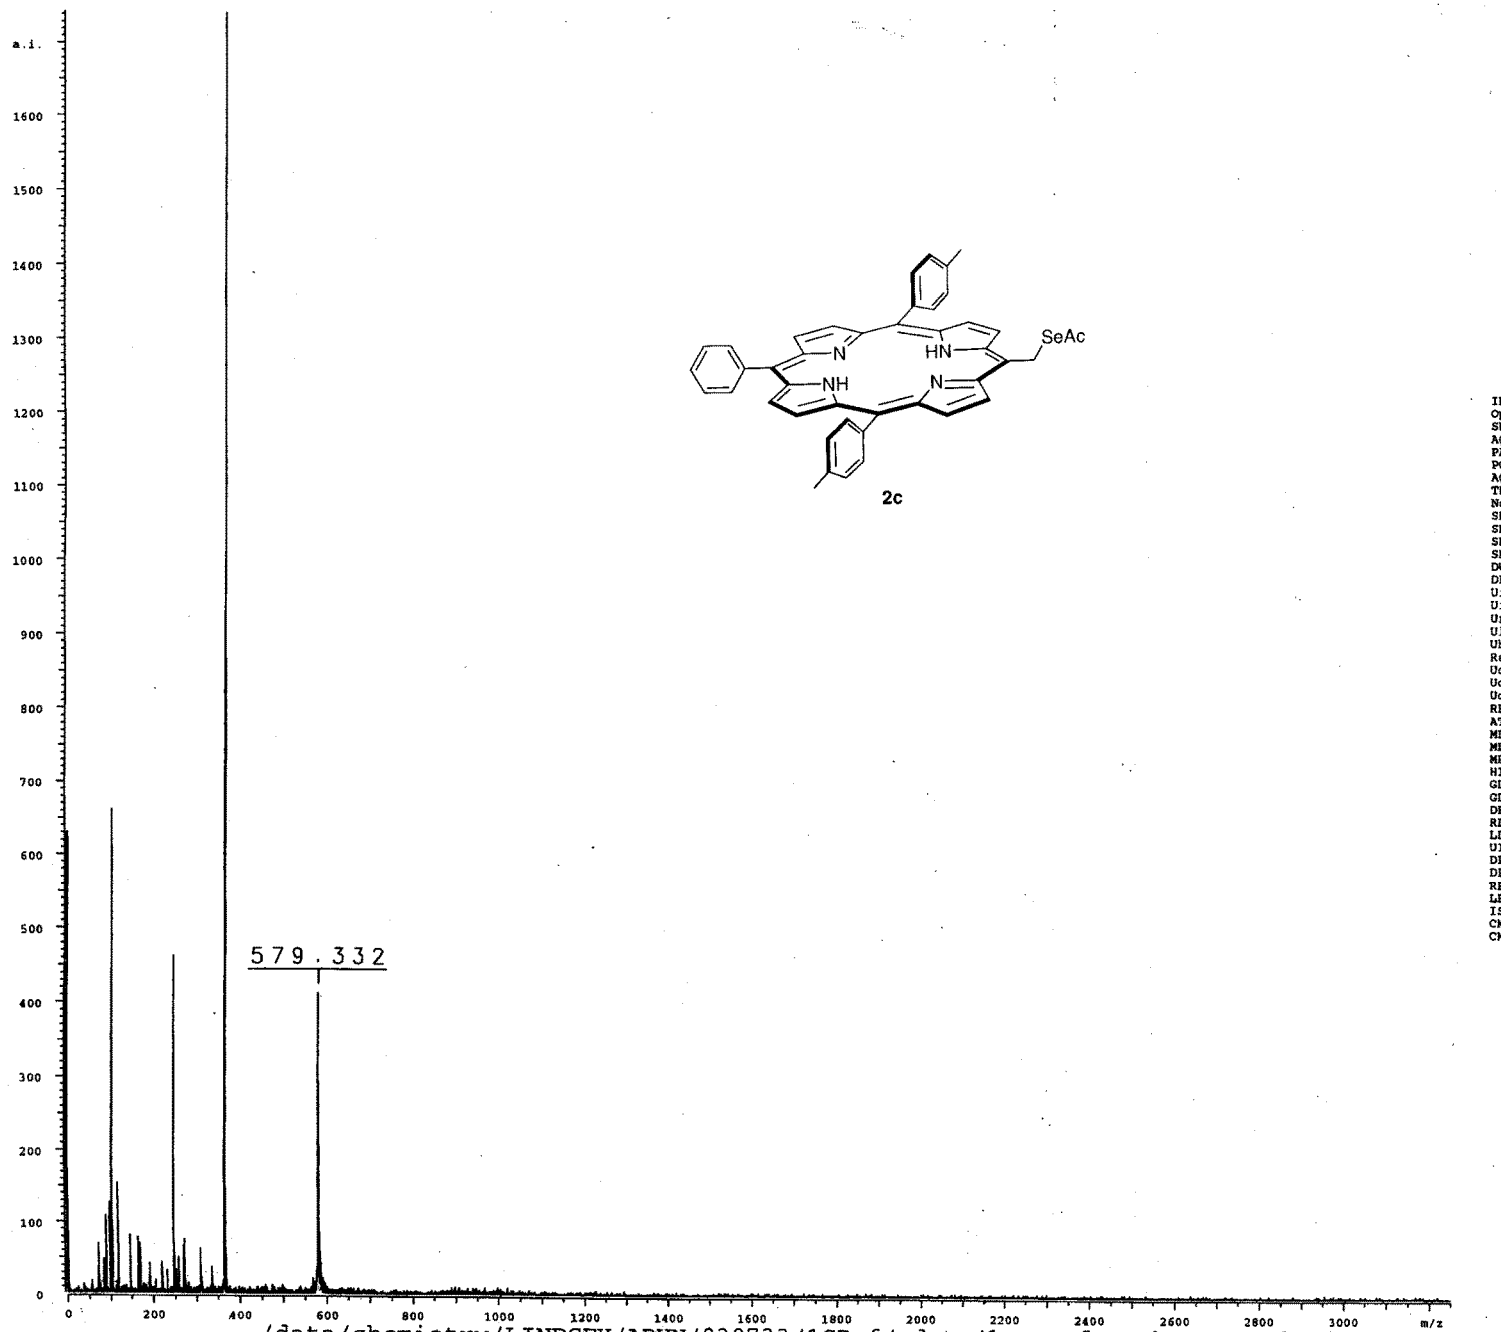

```

INSTRUM TOP
OpId N. Srinivasan
SMPNAM 030733
AQ_DATE Thu Oct 16 16:41:22 2003
PATH /data/chemistry/LINDSEY/ARUN
POLARI POS
AQOP_m Reflector
TD 40000
NoSHOTS 32
SMONUM 0
SMOPTS1 0
SMOPTS2 0
SMOPTS3 0
DW 1.00 [ns]
DELAY 0 [ns]
Uis1 20.00 [kV]
Uis2 18.70 [kV]
Uref1 0.00 [kV]
Ulen1 7.50 [kV]
Uhimass 10.00 [kV]
RefFull 0.00 [kV]
UdetL 1.50 [kV]
UdetR 0.00 [kV]
Udef1 2.00 [kV]
REPHZ 1.00 [Hz]
ATTEN 29.0
ML1 2067125.193
ML2 333.982
ML3 0.000
HITURBO no
GDEON yes
GDEPLY short
DEFLAC no
RLNSEND no
LLNSEND no
UIS2END no
DPCAL1 510.84
DPMAS 700.00 [Da]
RENDVAL 0.33
LENDVAL 0.28
IS2ENDV 0.91
CMT1 AcSe por, col pure
CMT2 no matrix

```

/data/chemistry/LINDSEY/ARUN/030733/1SRef/pdata/1 tof Thu Oct 16 16:41:42 2003

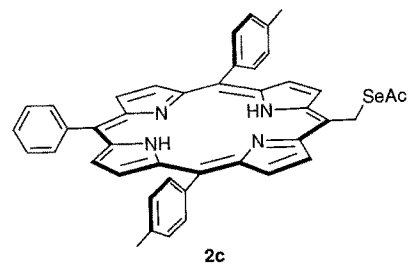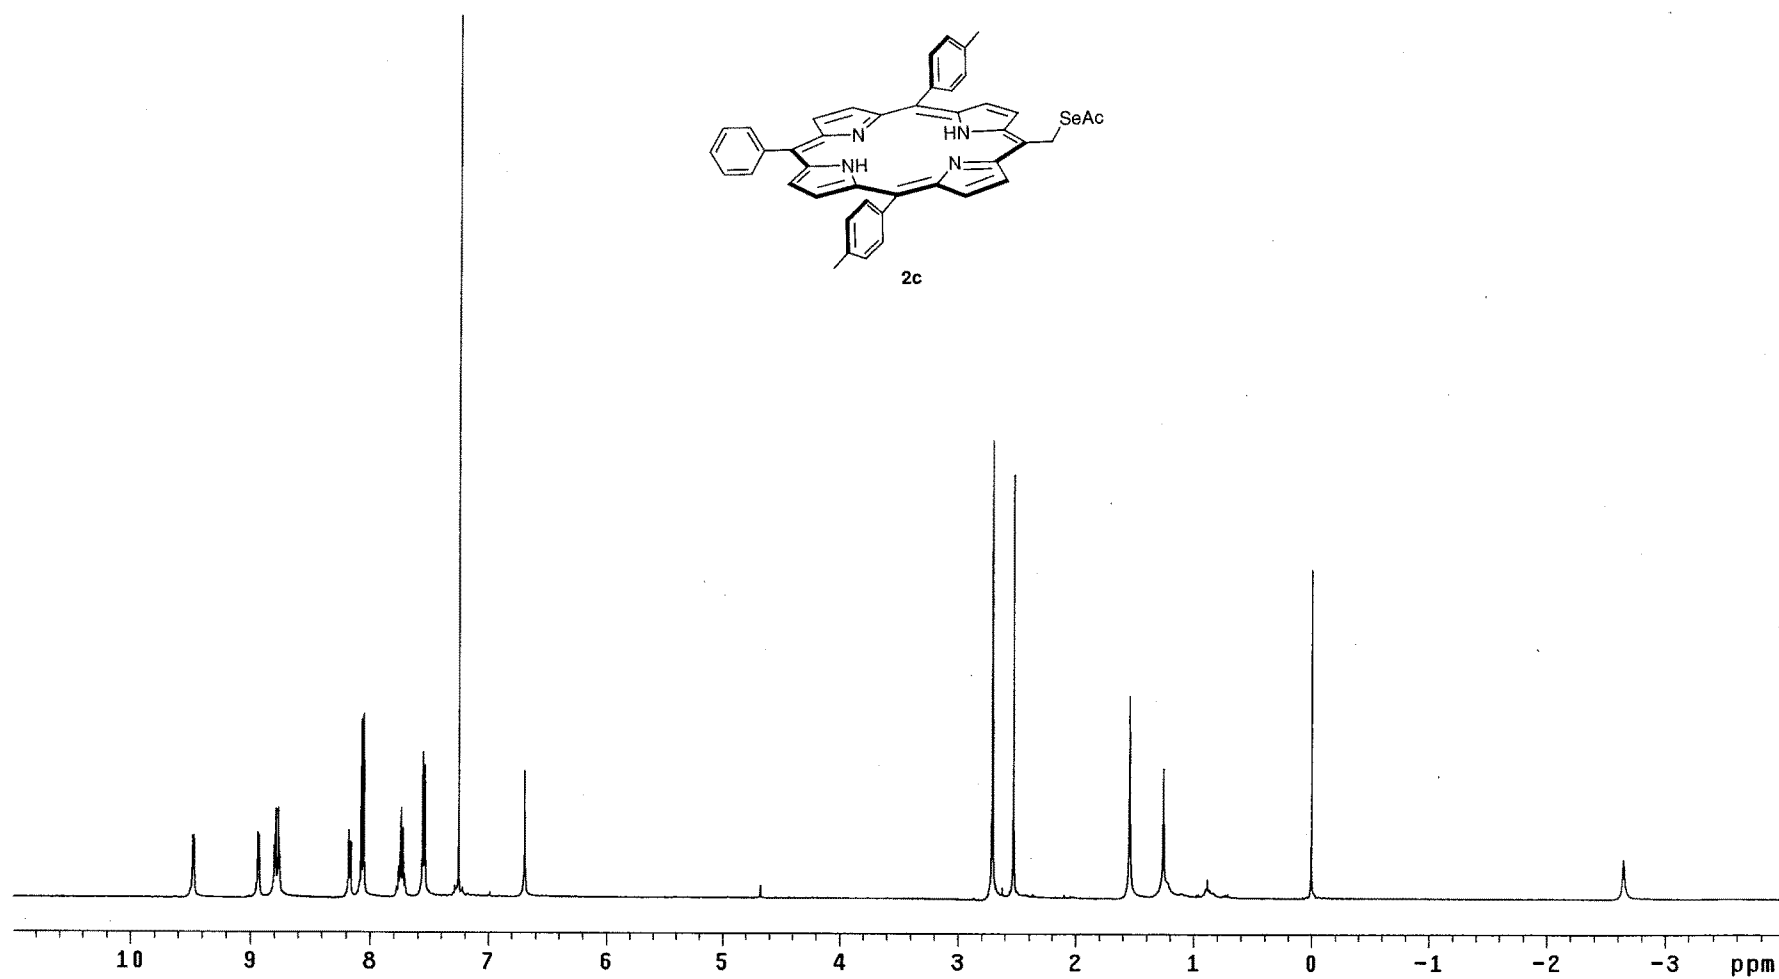





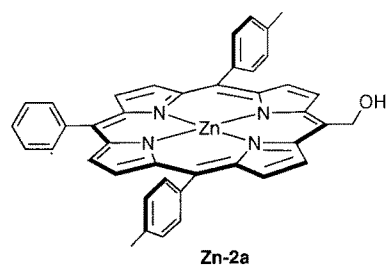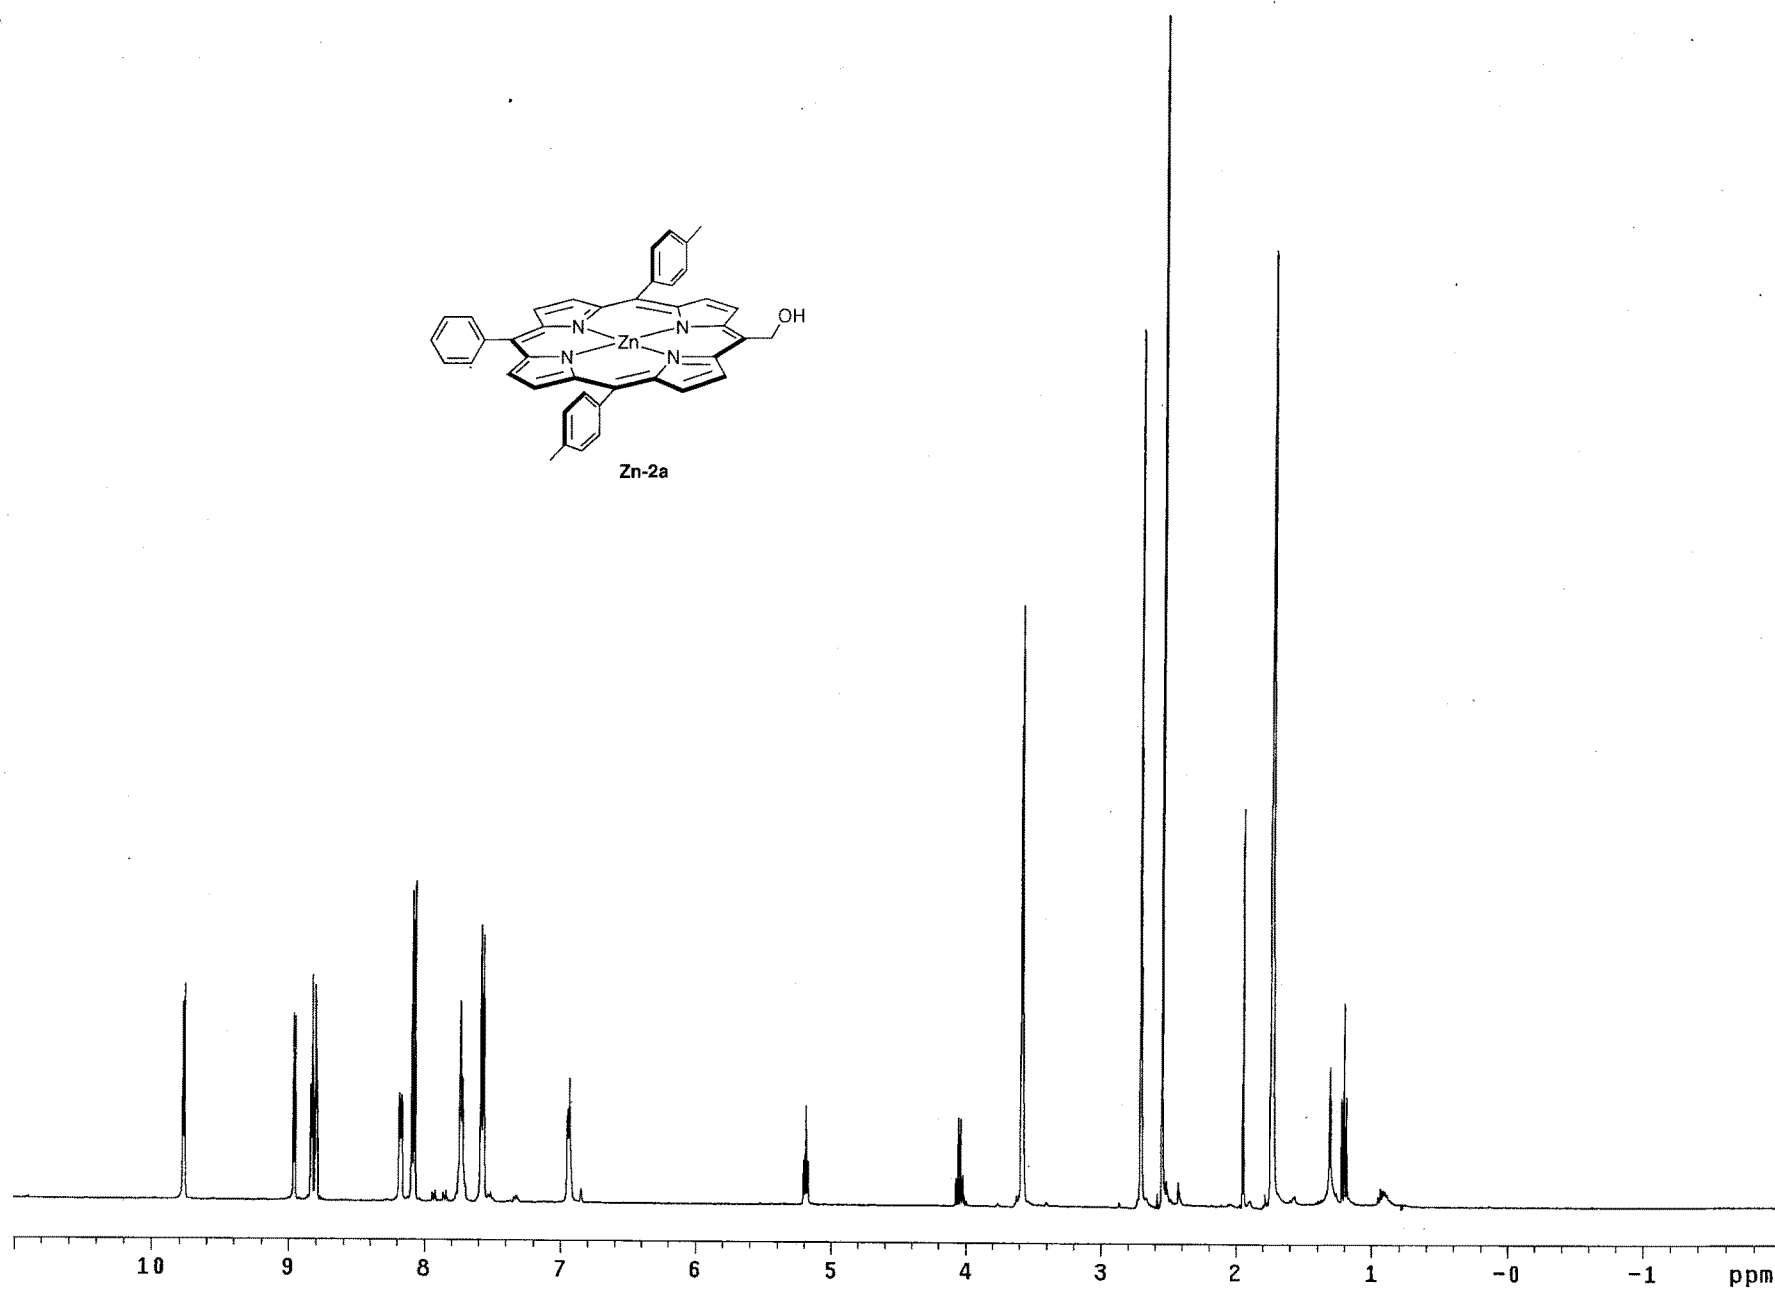

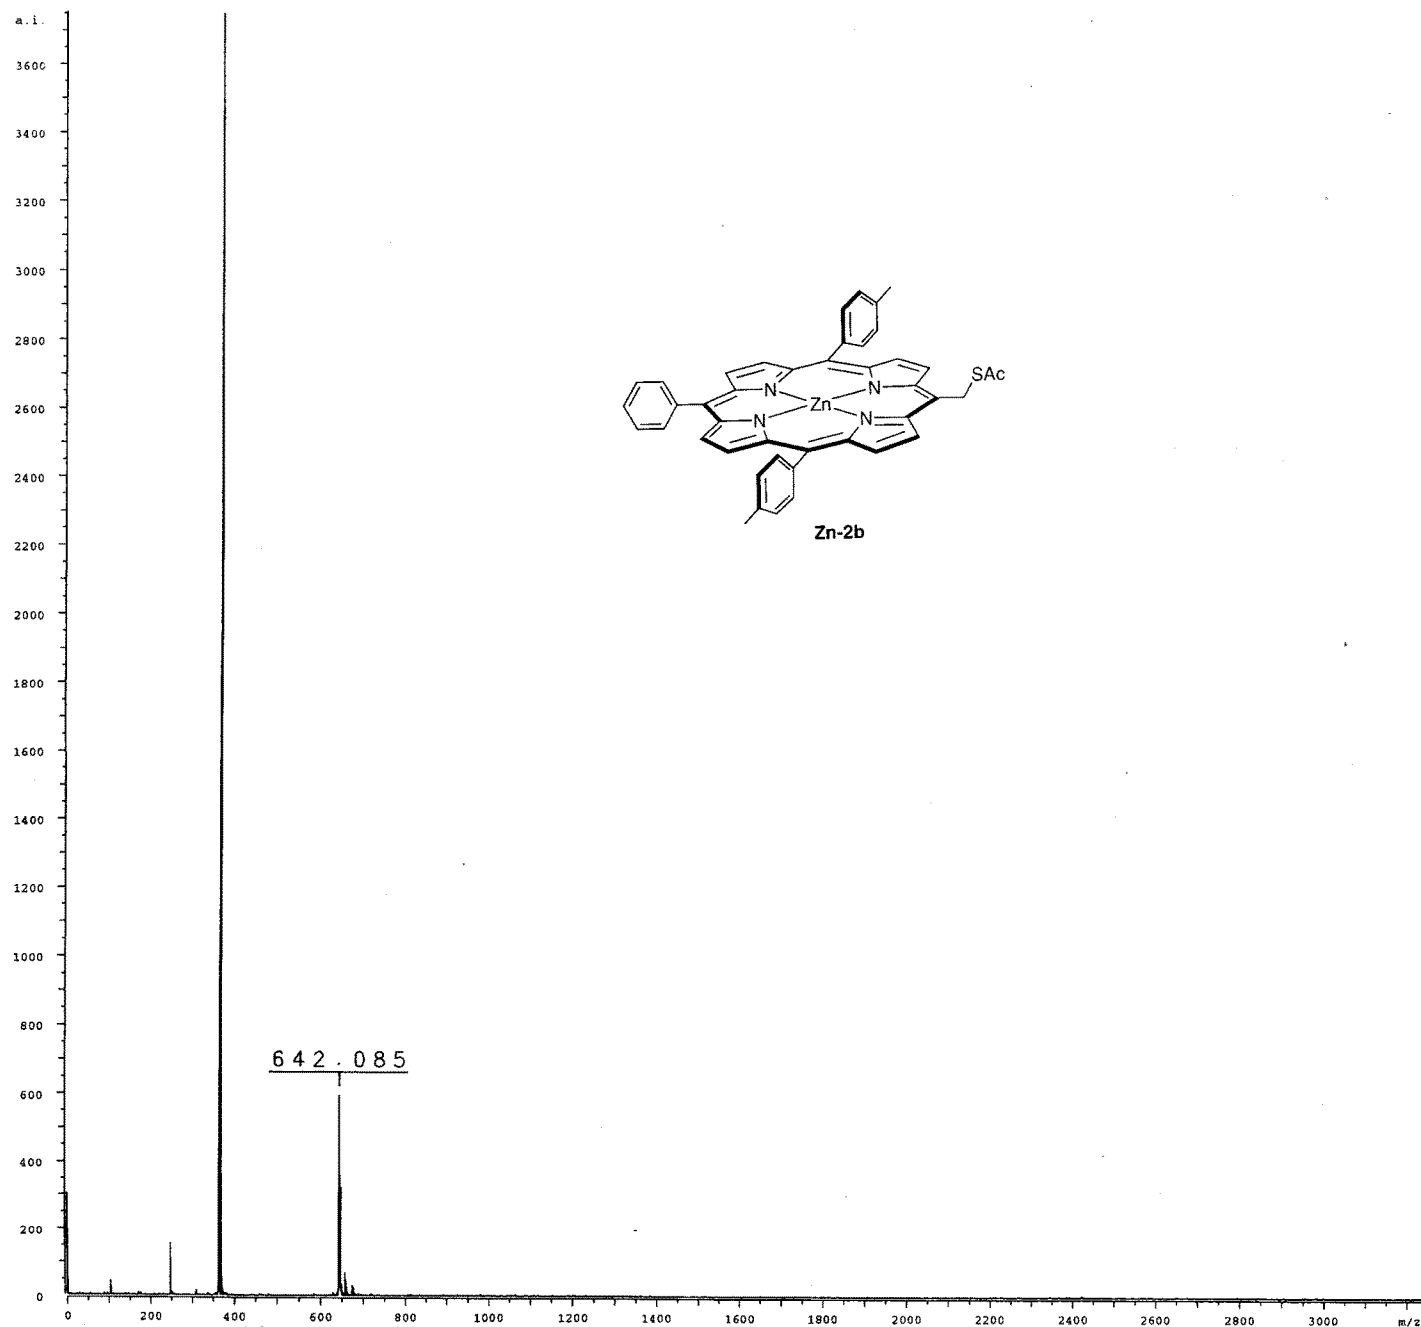

```

INSTRUM TOP
OpId N. Srinivasan
SMPLNAM 030642
AQ_DATE Thu Sep 25 20:40:27 2003
PATH /data/chemistry/LINDSEY/MURESAN
POLARI POS
AQOP_m Reflector
TD 40000
NoSHOTS 24
SMONUM 0
SMOPTS1 0
SMOPTS2 0
SMOPTS3 0
DW 1.00 [ns]
DELAY 0 [ns]
Uis1 20.00 [kV]
Uis2 18.70 [kV]
Urefl 0.00 [kV]
Ulenz 7.50 [kV]
Uhlmass 10.00 [kV]
RefPull 0.00 [kV]
UdetL 1.50 [kV]
UdetR 0.00 [kV]
Udefl 2.00 [kV]
REPHZ 1.00 [Hz]
ATTEN 40.0
ML1 2067125.193
ML2 333.982
ML3 0.000
HITURBO no
GDEON yes
GDELY short
OEFLW no
RLSEND no
LLSEND no
UIS2END no
DPCAL1 510.84
DPMAS 700.00 [Da]
RNDVAL 0.33
LNDVAL 0.28
IS2ENDV 0.91
CMT1 Zn SAC por
CMT2 cr mix

```

/data/chemistry/LINDSEY/MURESAN/030642/1SRef/pdata/1 tof , Thu Sep 25 20:41:02 2003

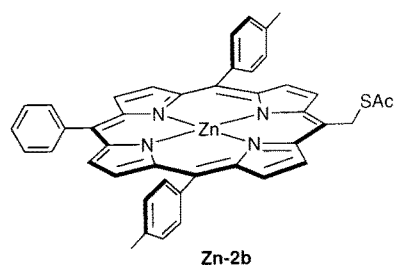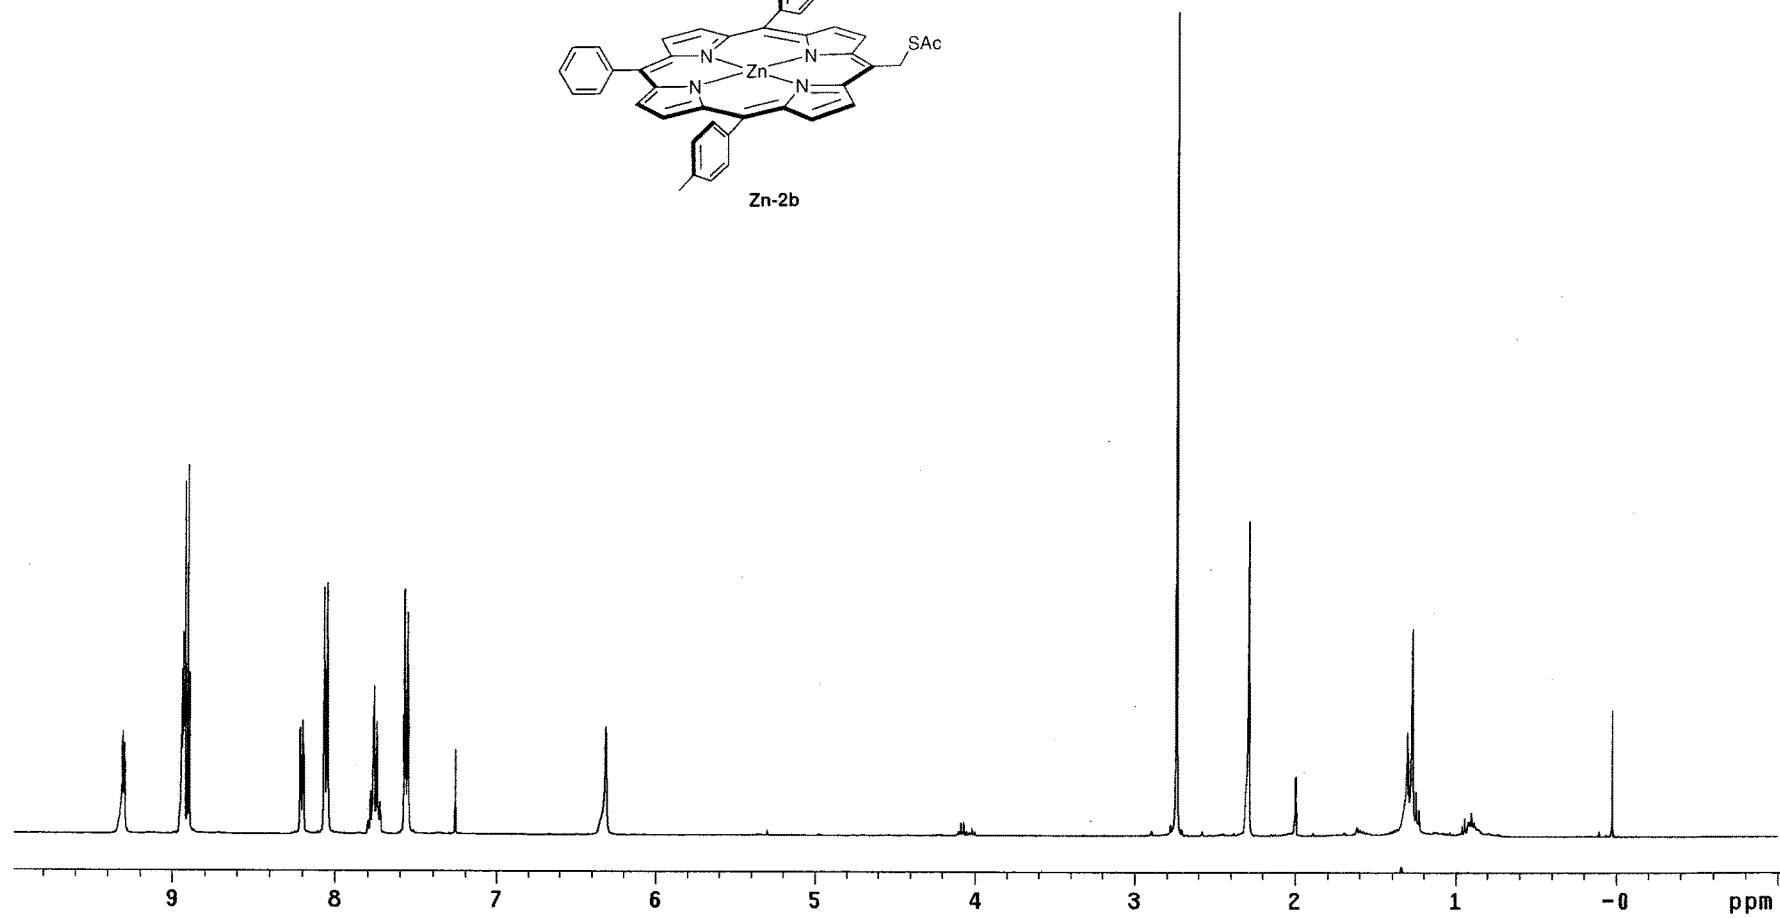

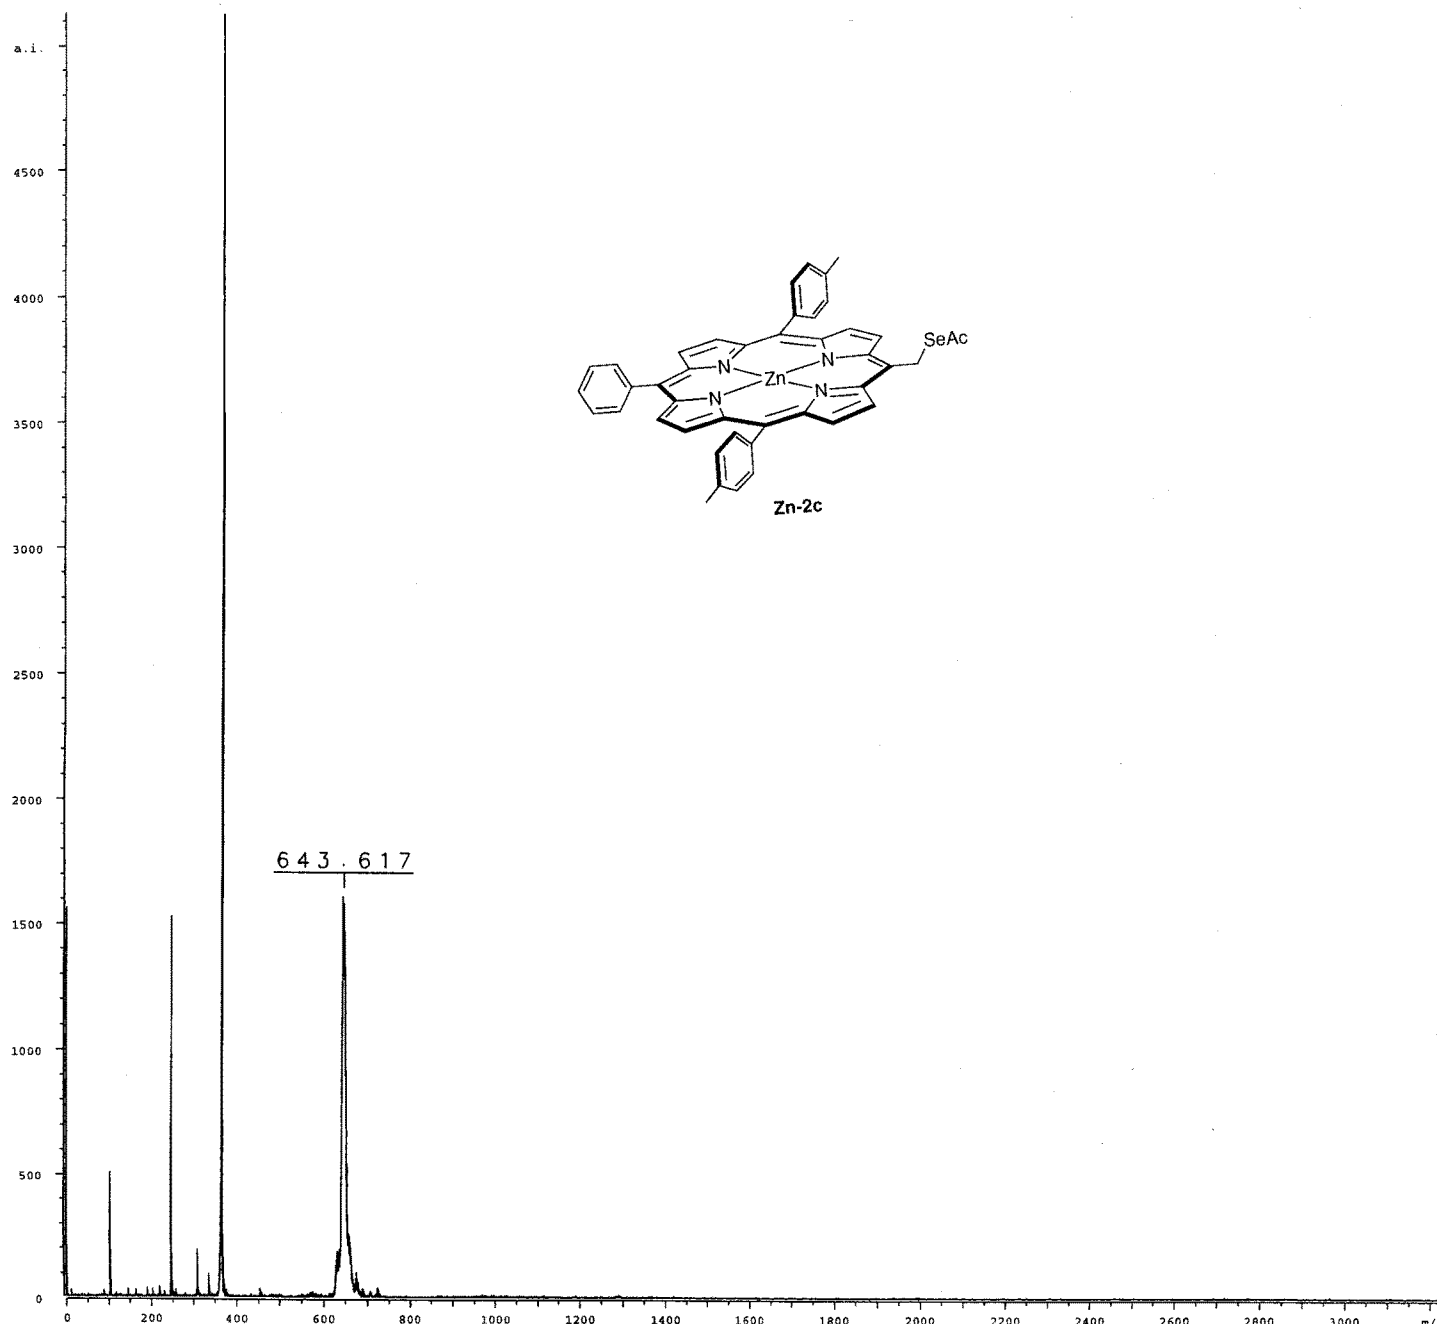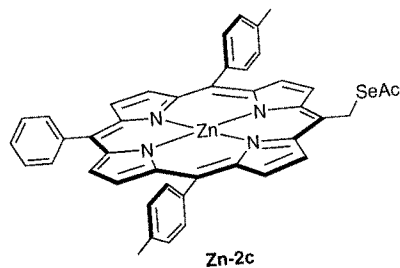

```

INSTRUM TOP
OpId N. Srinivasan
SMPNAM 030736
AQ_DATE Fri Oct 17 14:41:34 2003
PATH /data/chemistry/LINDSEY/ARUN
POLARI POS
AQOP_m Reflector
TD 40000
NoSHOTS 80
SHOWMUM 0
SMOPTS1 0
SMOPTS2 0
SMOPTS3 0
DW 1.00 [ns]
DELAY 0 [ns]
Uis1 20.00 [kV]
Uis2 18.70 [kV]
Uref1 0.00 [kV]
Ulen5 7.50 [kV]
Uhinmass 10.00 [kV]
RefPull 0.00 [kV]
UdetL 1.50 [kV]
UdetR 0.00 [kV]
Udef1 2.00 [kV]
REPHZ 1.00 [Hz]
ATTEN 33.0
ML1 2067125.193
ML2 333.982
ML3 0.000
HITURBO no
GDEON yes
GDEDL short
DEFLON no
RLNSEND no
LLNSEND no
UISSEND no
DPCALL 510.84
DPMAS 700.00 [Da]
RENDVAL 0.33
LENDVAL 0.28
ISSENDV 0.91
CMT1 AcSe-zn-por
CMT2 matrix
  
```

/data/chemistry/LINDSEY/ARUN/030736/1SRef/pdata/1 tof Fri Oct 17 14:41:59 2003

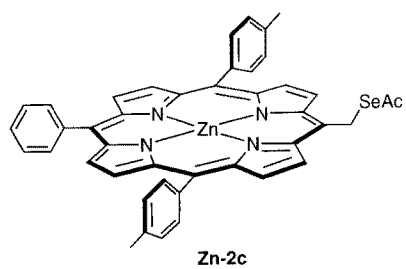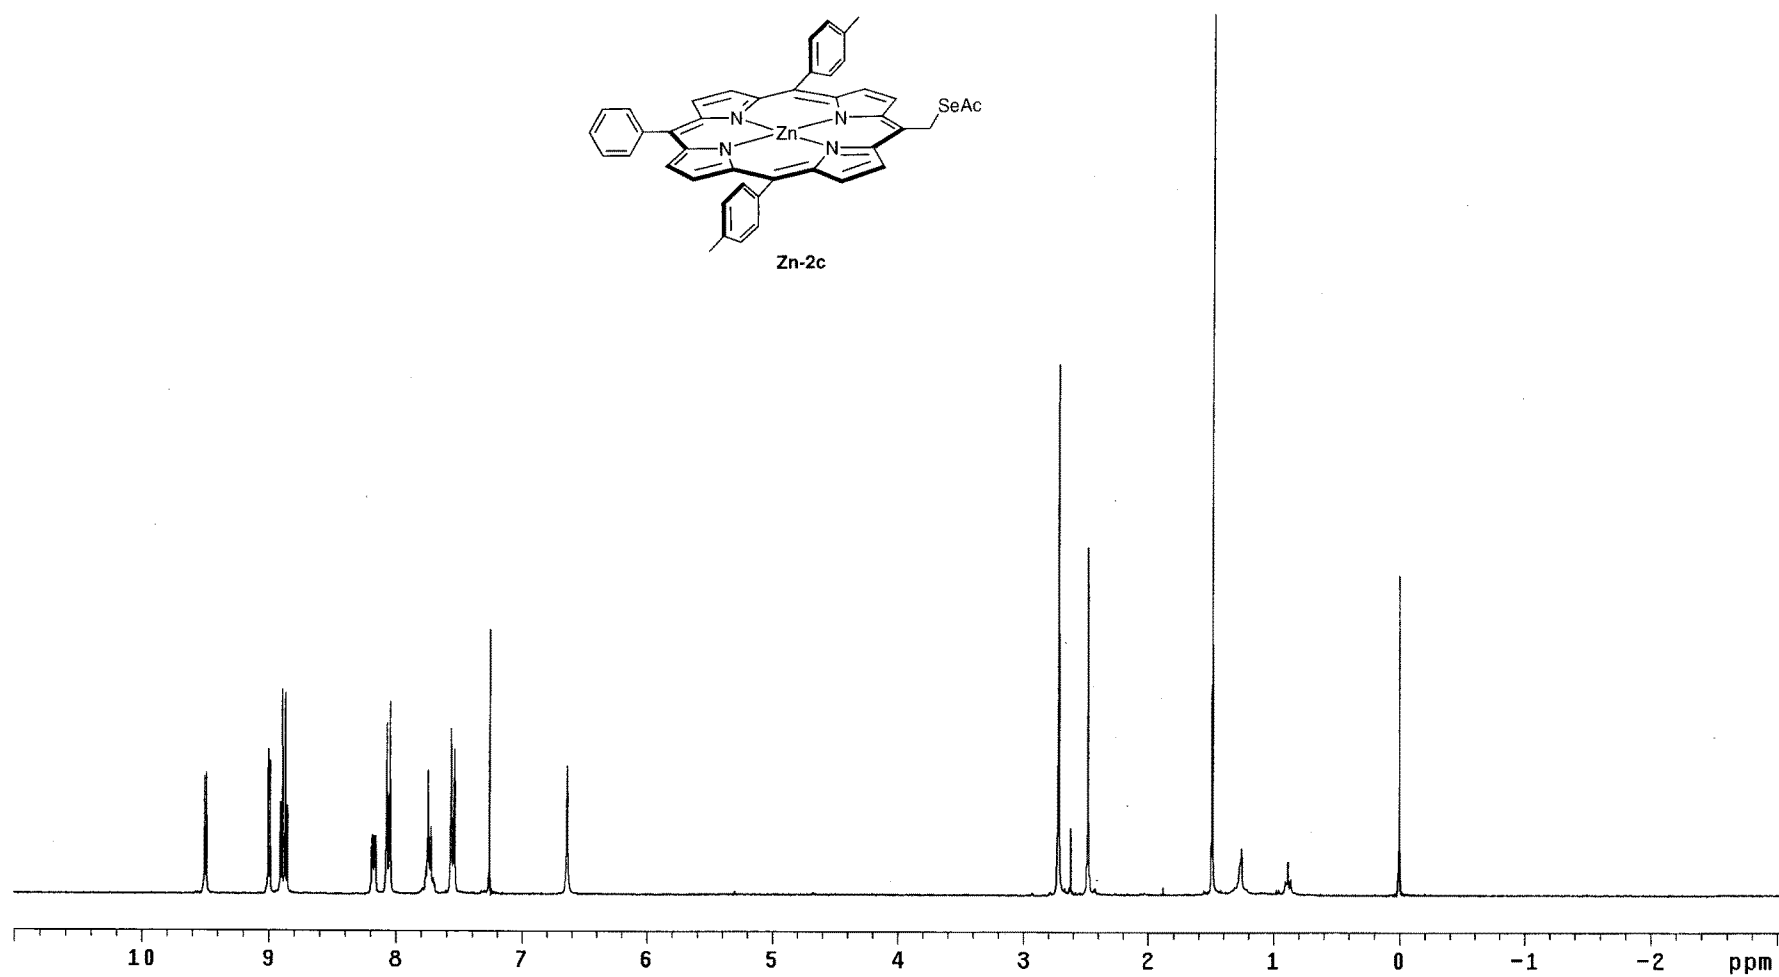

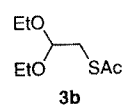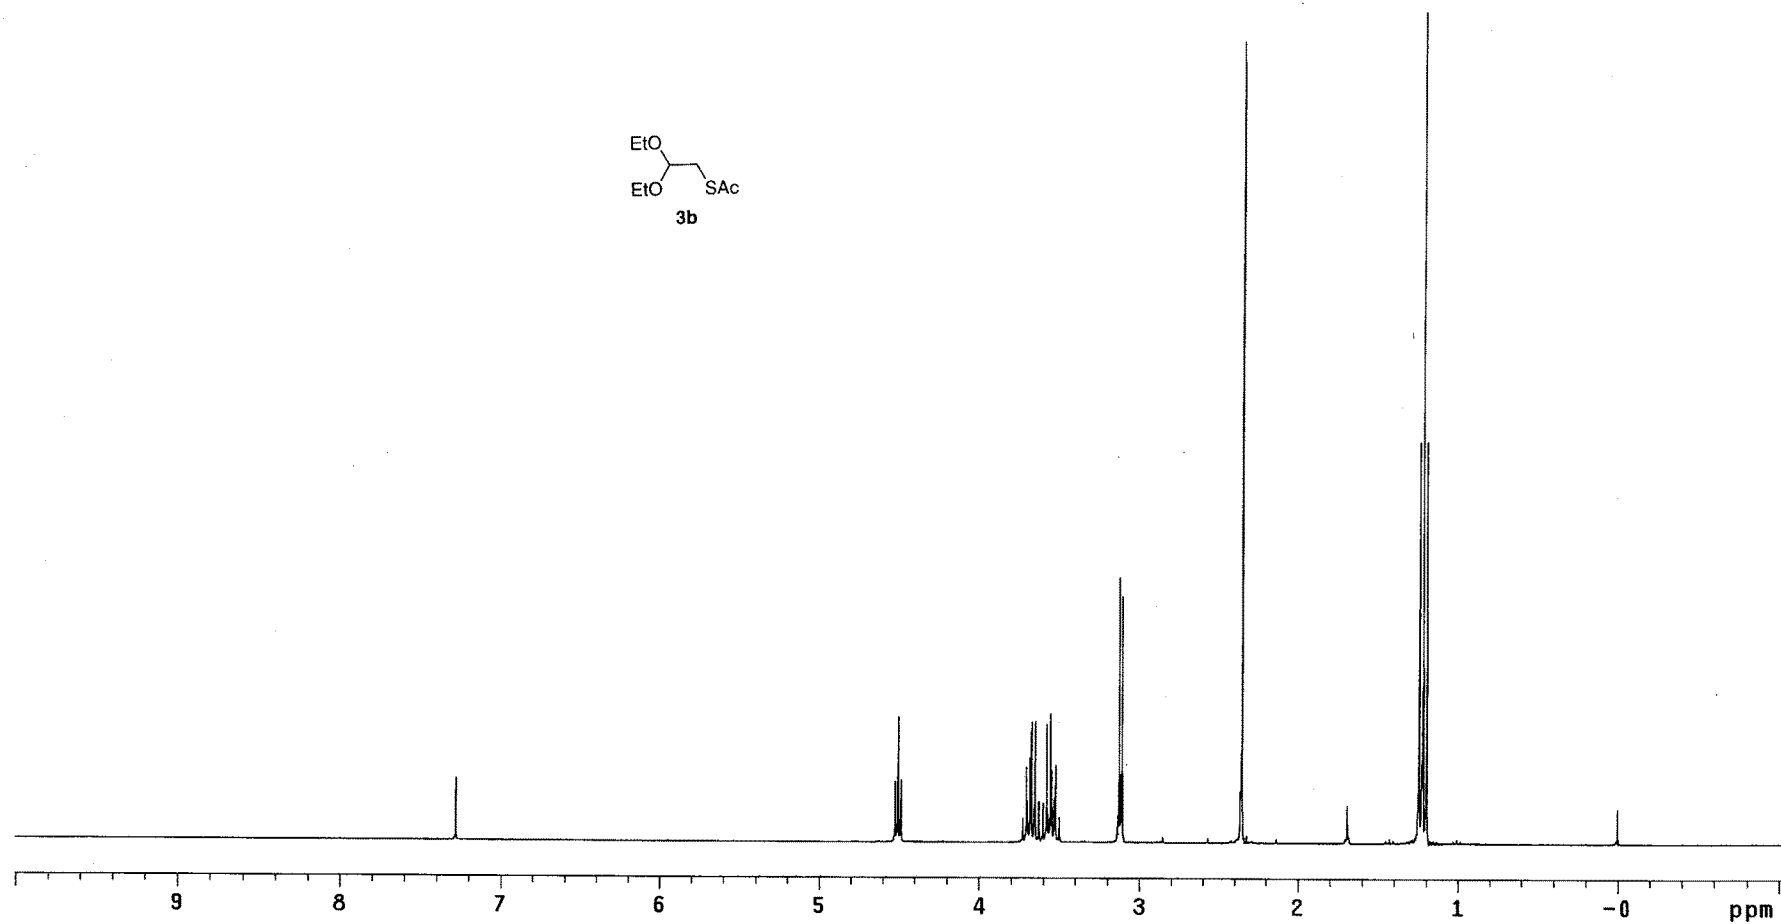

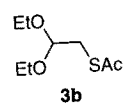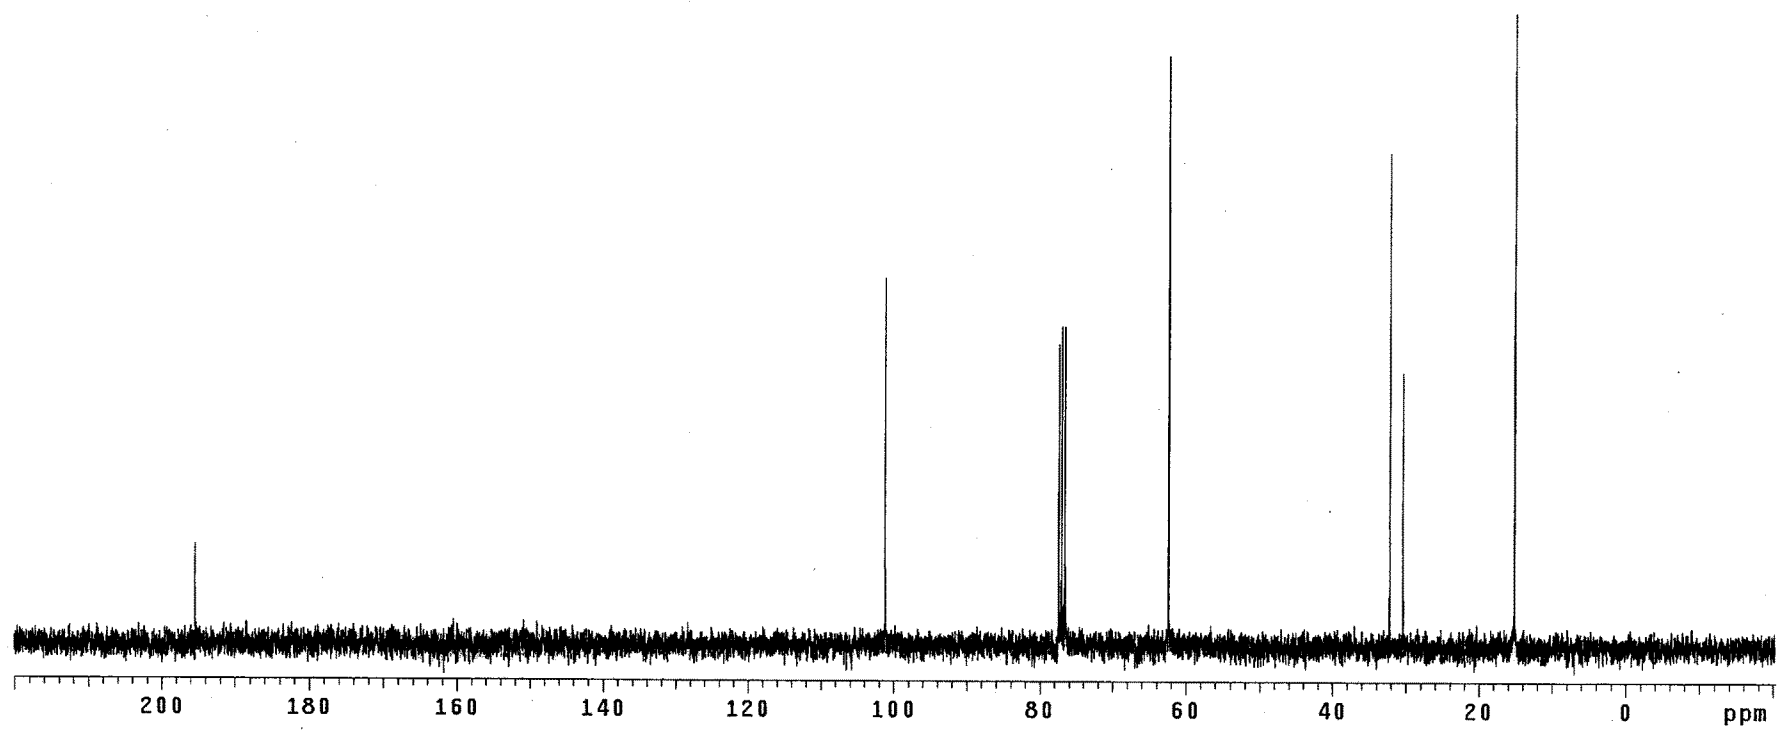

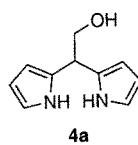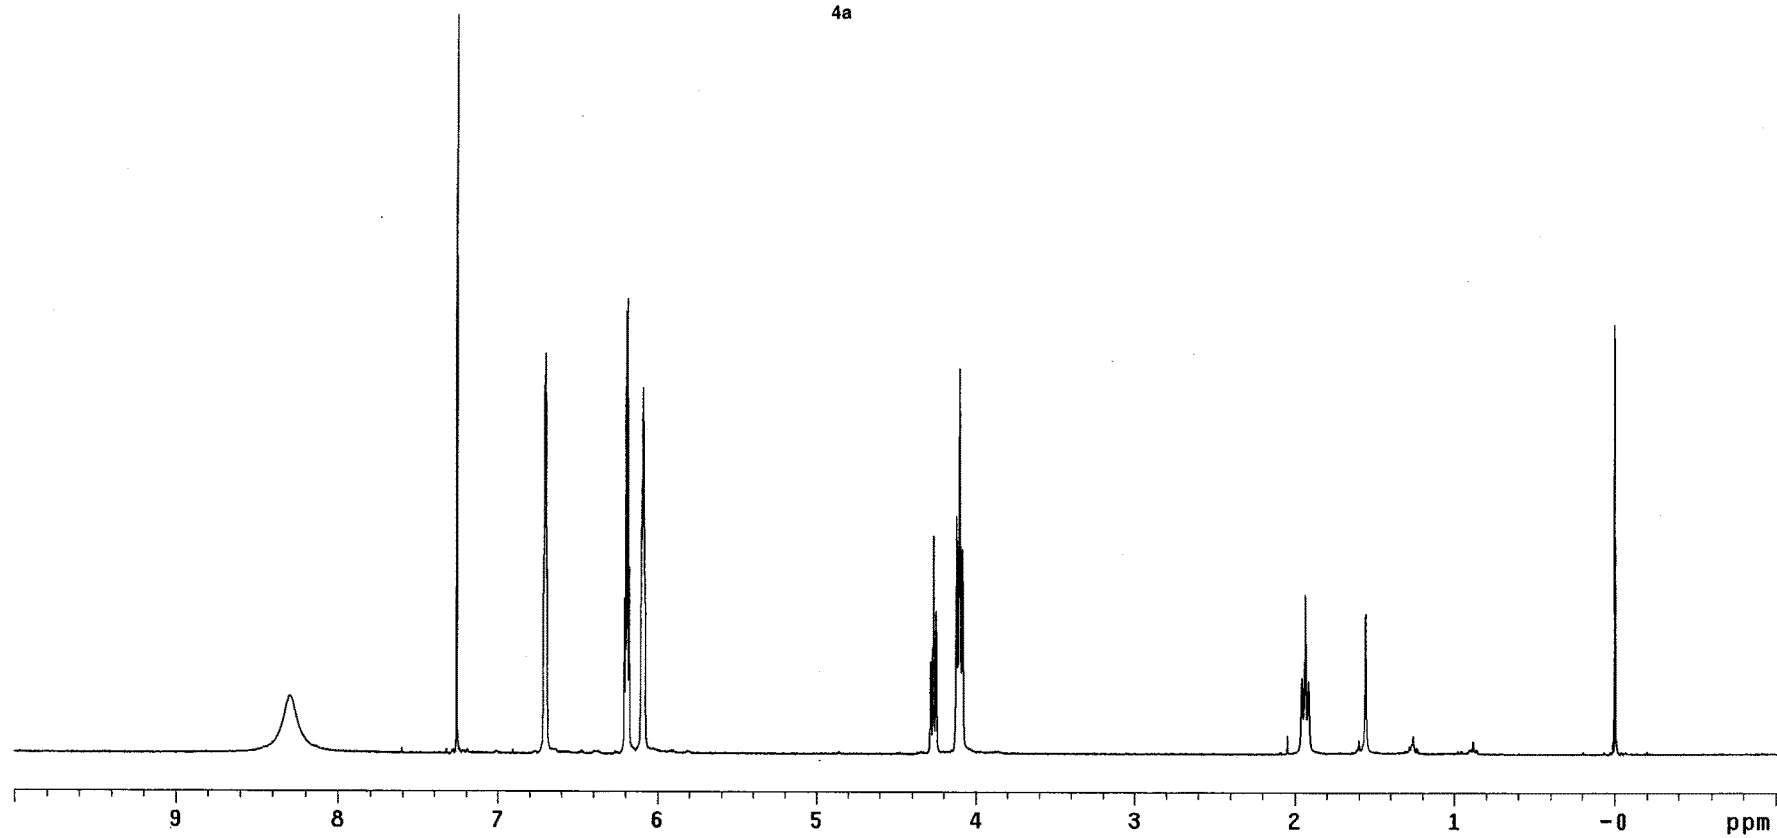



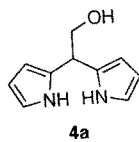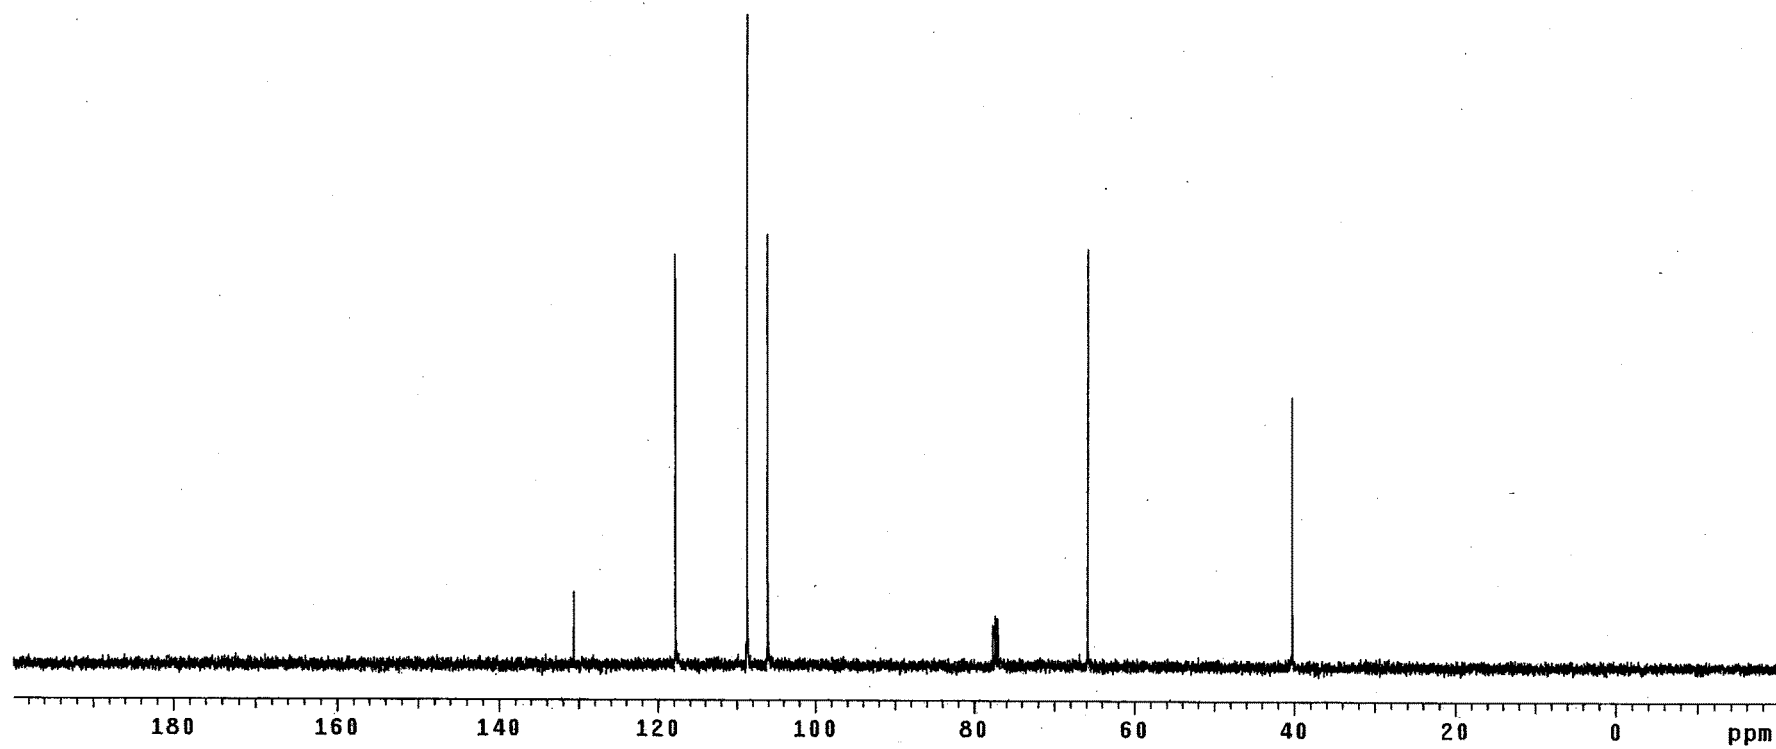

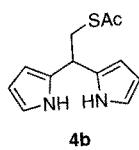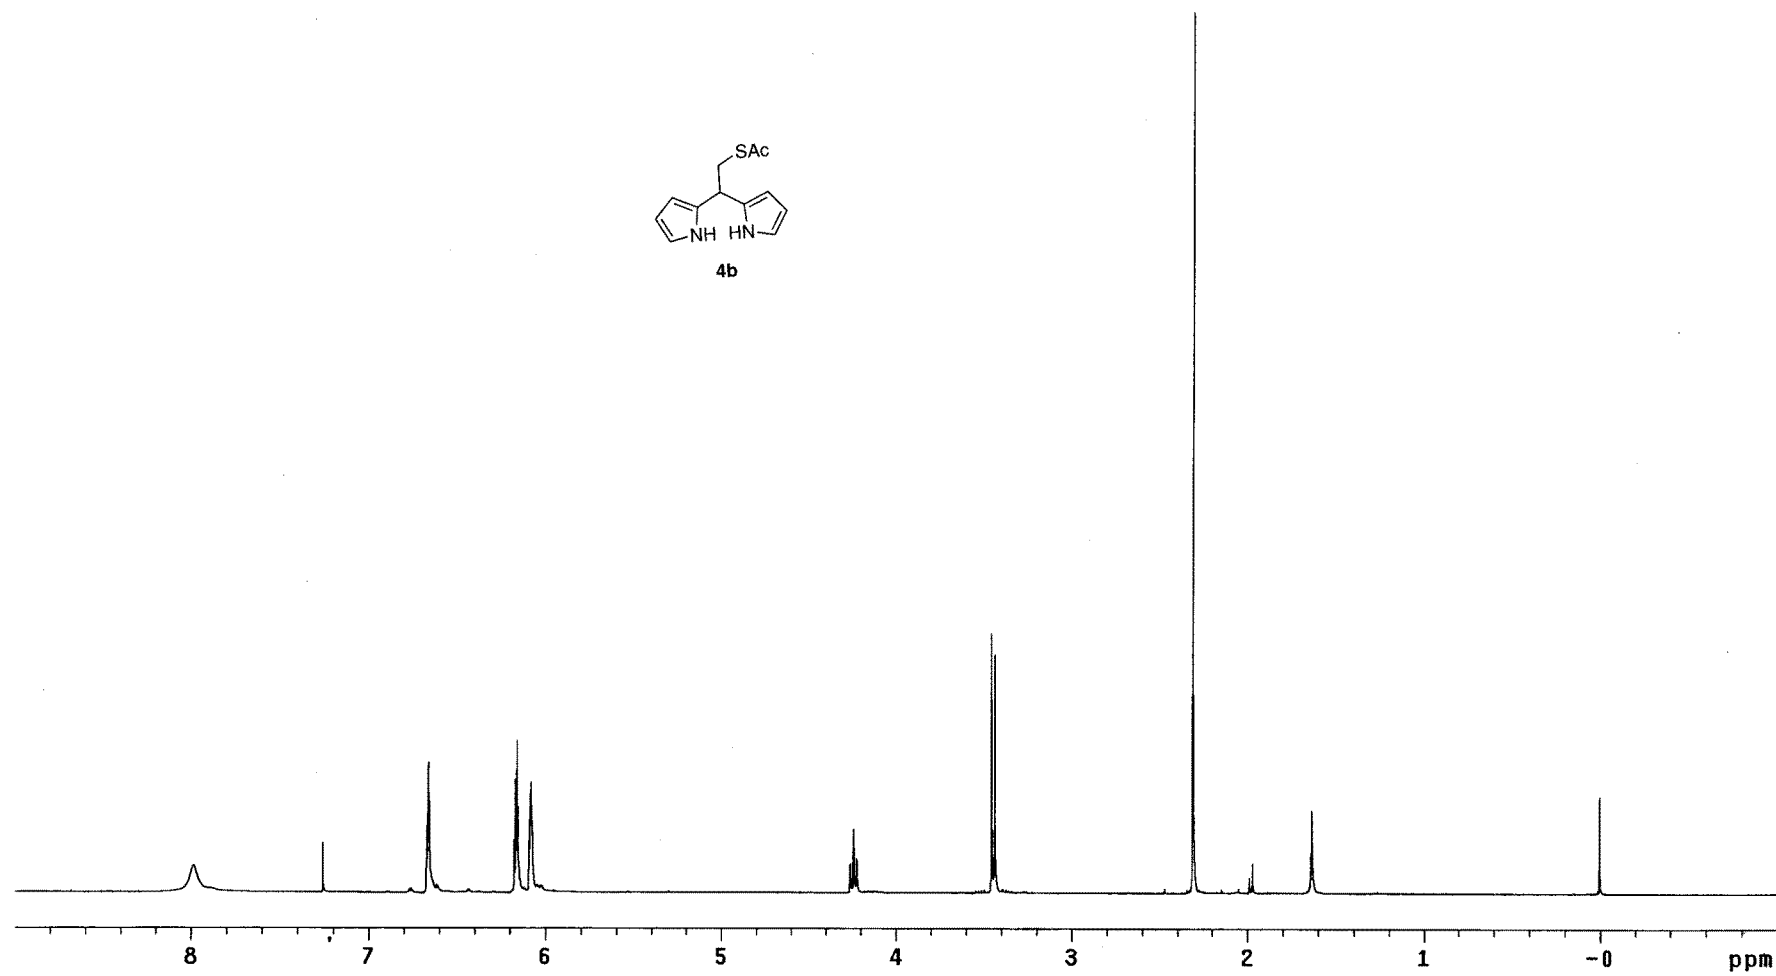

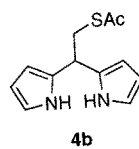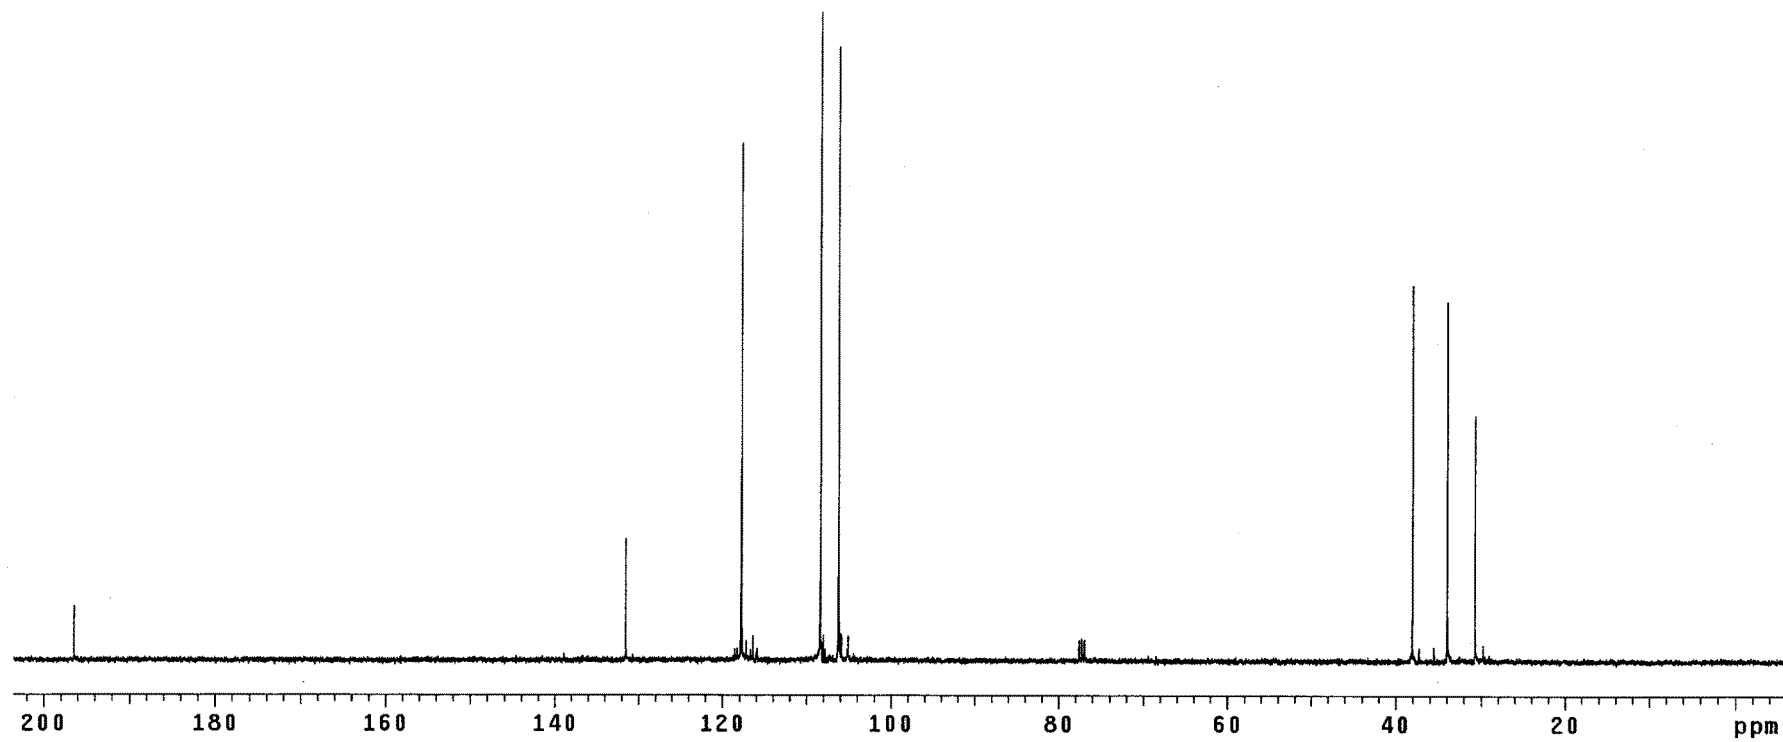

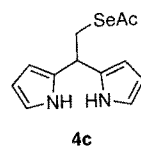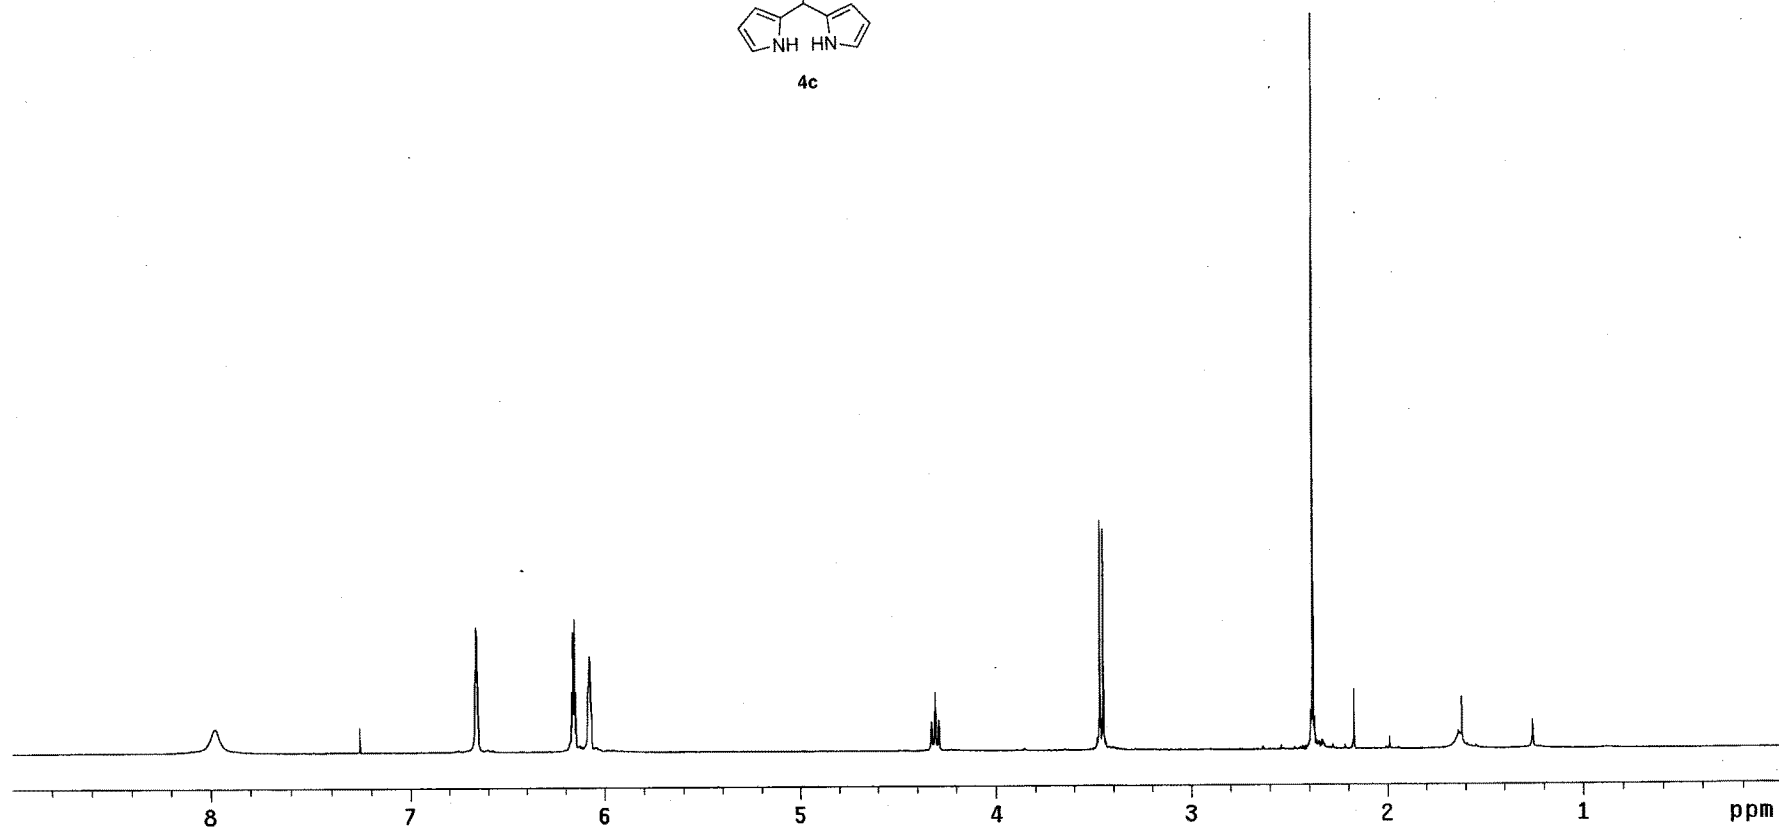

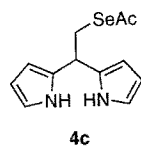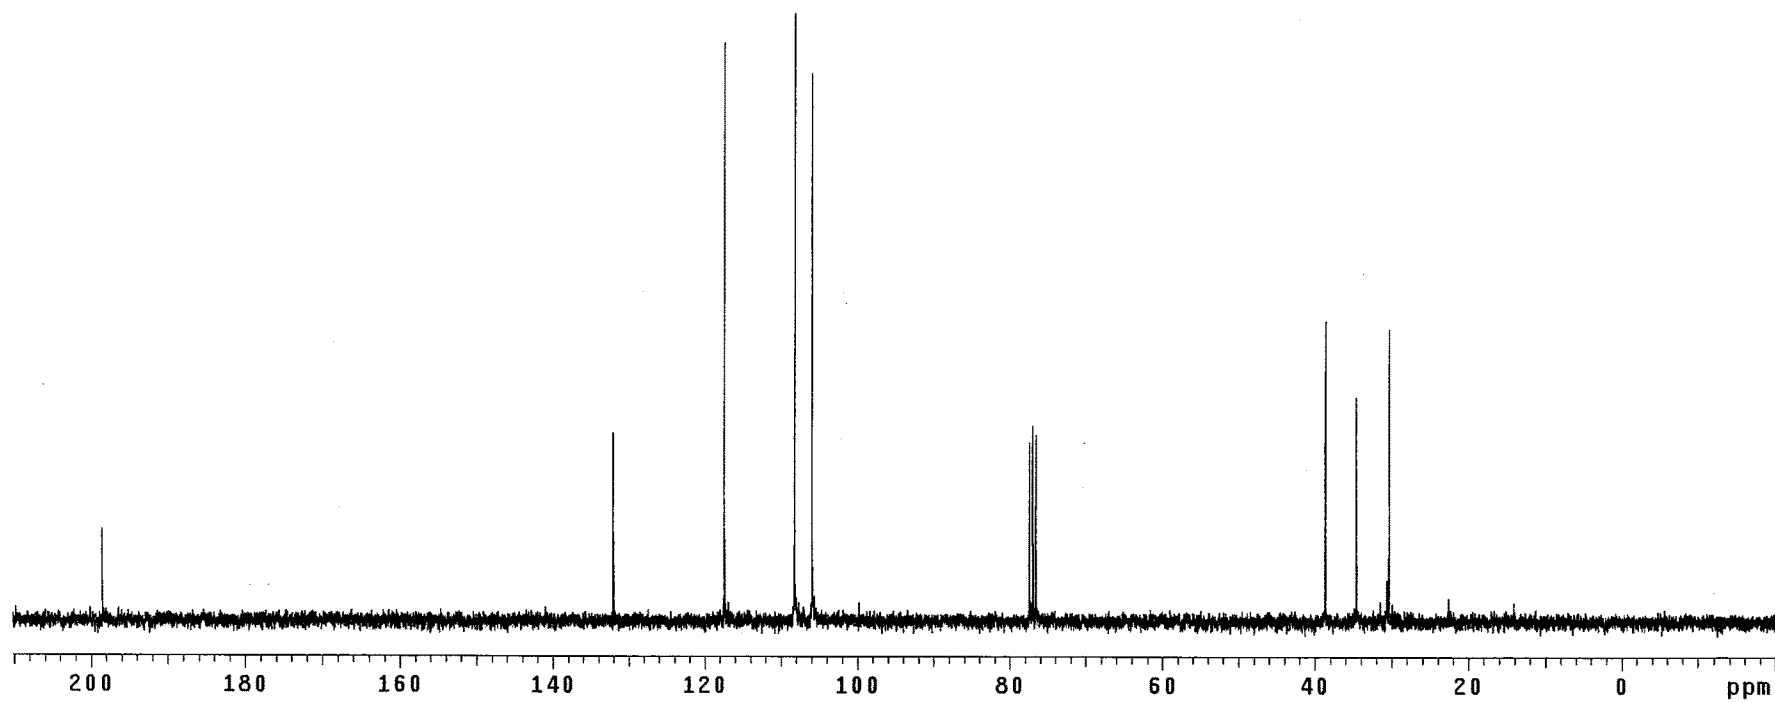

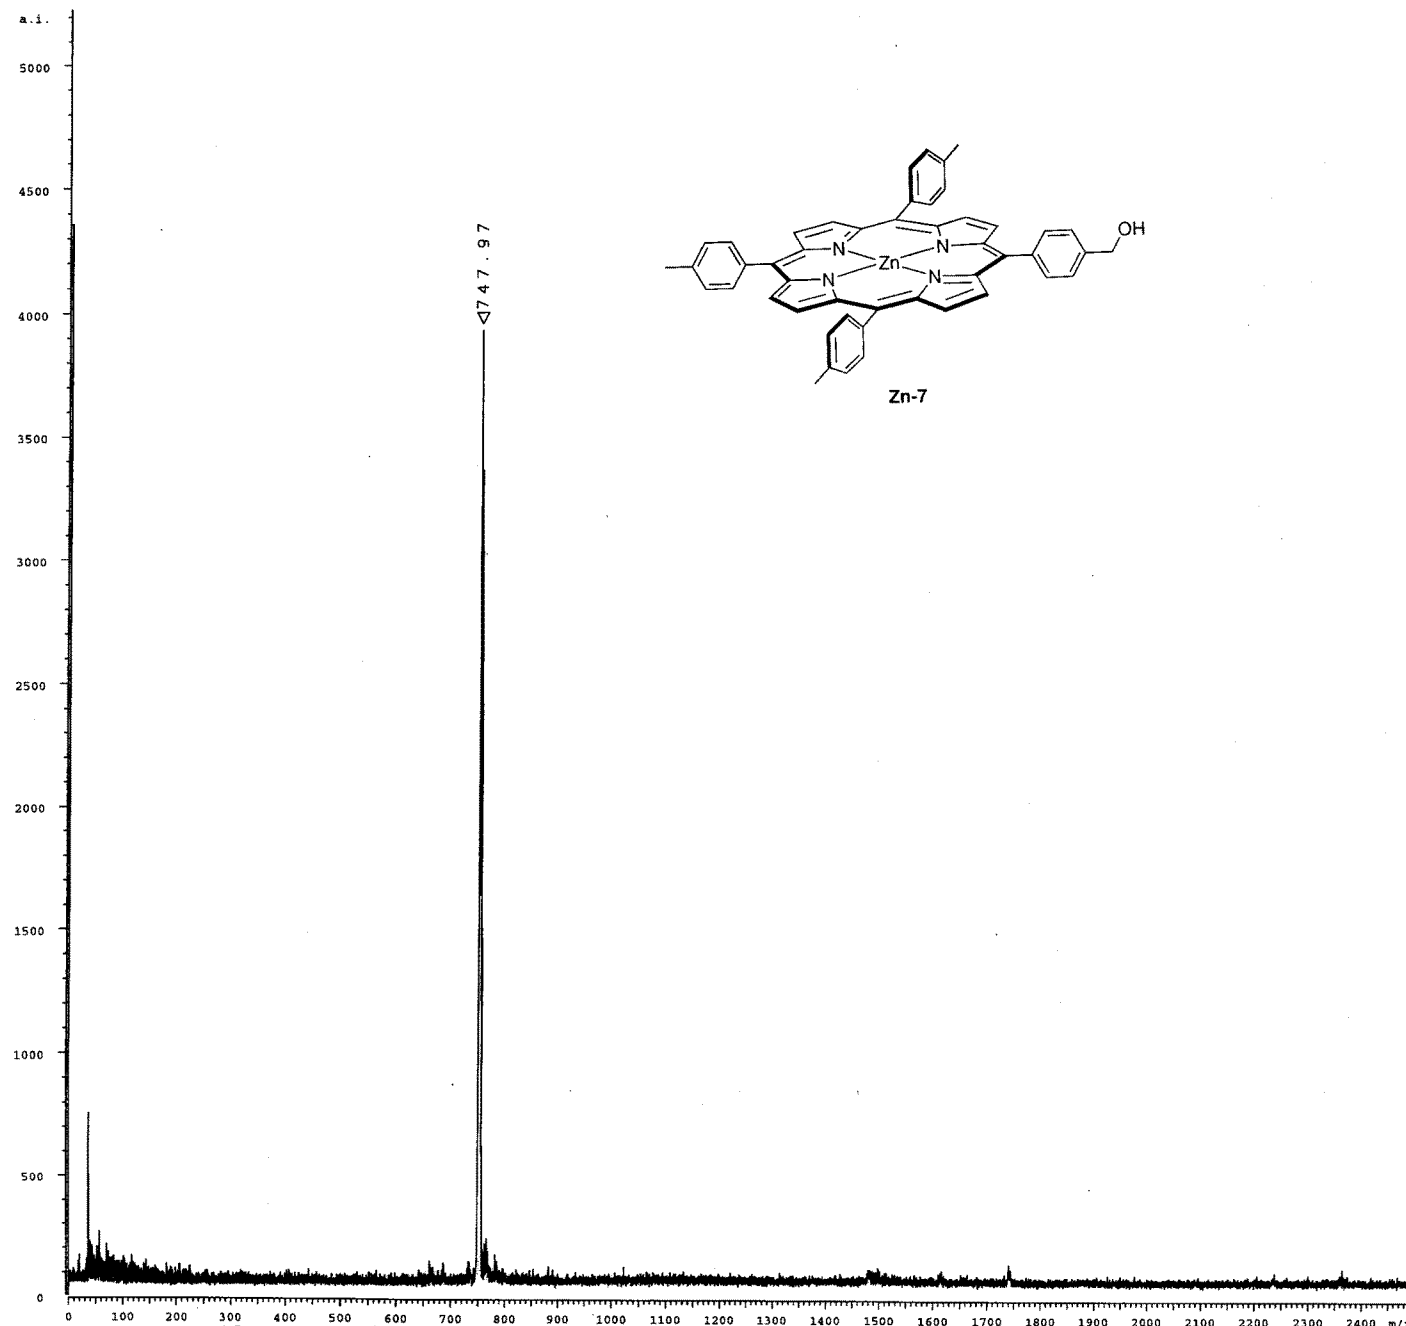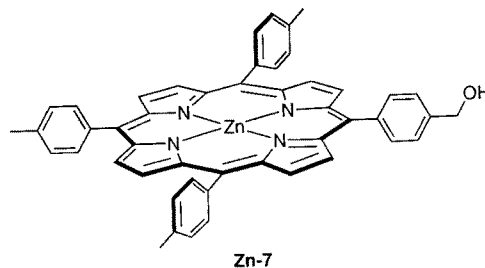

```

INSTRUM TOF
OpId Unknown
SMPNAM 148125
AQ_DATE Mon Mar 5 16:03:07 2001
PATH /data/chemistry/LINDSEY/SCHWEIKART
POLARI POS
AQCF_m Reflector
TD 35000
NoSHOTS 200
SMONUM 0
SMOPTS1 0
SMOPTS2 0
SMOPTS3 0
DW 1.00 [ns]
DELAY 0 [ns]
Uis1 20.00 [kV]
Uis2 18.50 [kV]
Uref1 0.00 [kV]
Ulen 7.50 [kV]
Uhimass 10.00 [kV]
RefFull 0.00 [kV]
UdetL 1.55 [kV]
UdetR 0.00 [kV]
Udef1 2.00 [kV]
REPHZ 1.00 [Hz]
ATTEN 37.0
ML1 2077751.567
ML2 353.368
ML3 0.000
HITURBO no
GDEON yes
GDEOLY short
DEFLON no
RLNSND no
LLNSND no
UISZND no
DPCALL 510.84
DPMAS 200.00 [Da]
RENDVAL 0.33
LENDVAL 0.28
ISZENDV 0.91
CMT1 Synthesis 72: trisTol-OHPorZn pure
CMT2 attn = 37, 200 shots
  
```

/data/chemistry/LINDSEY/SCHWEIKART/148125/1SRef/pdata/1 tof Mon Mar 5 16:17:04 2001

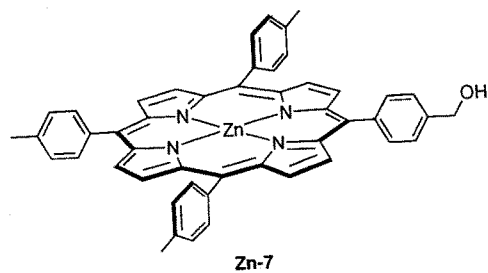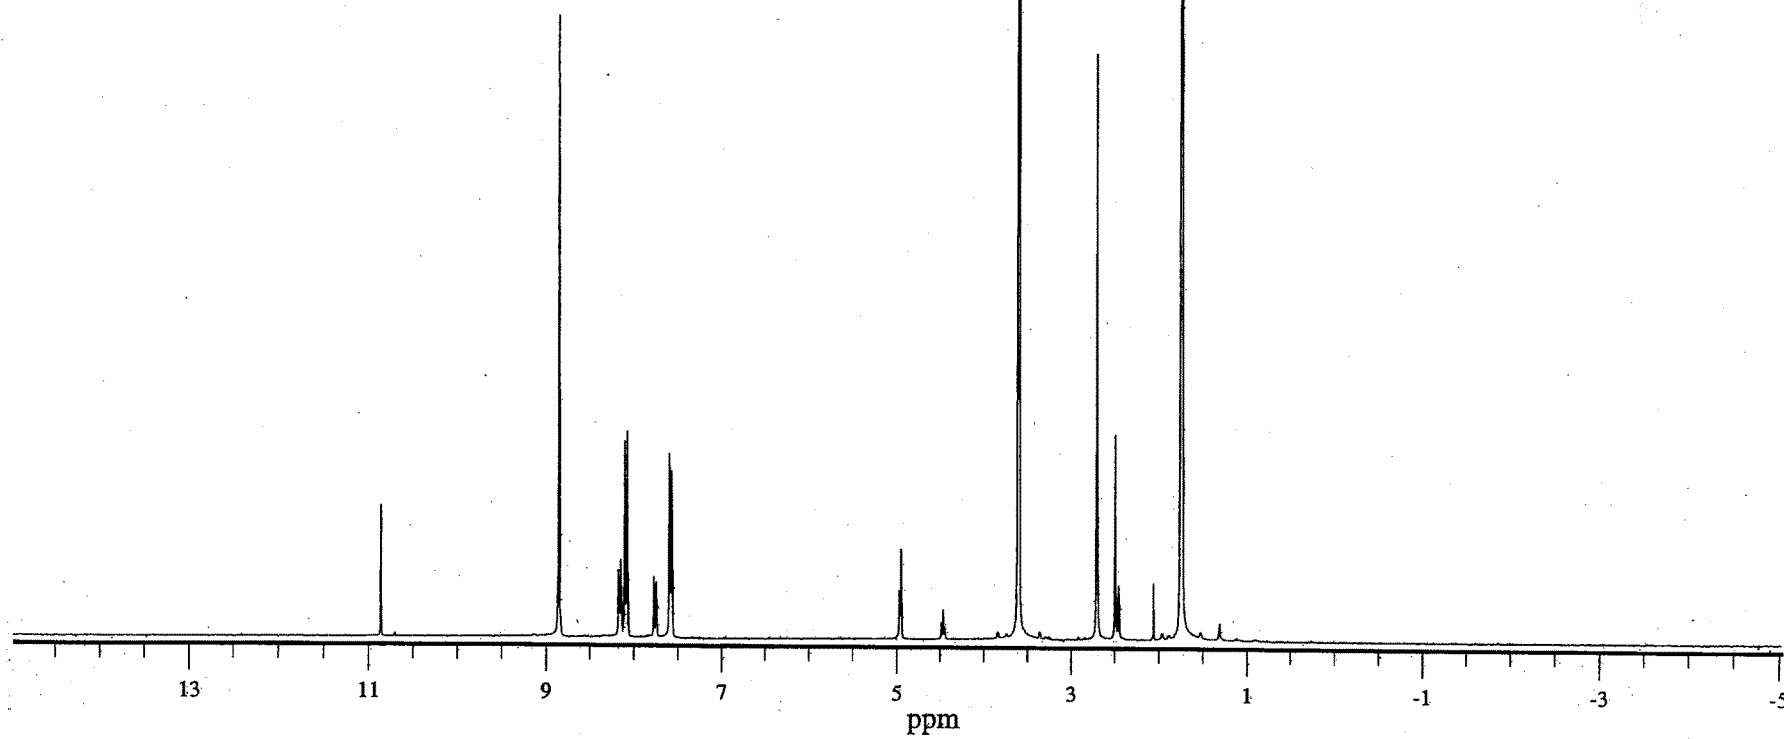

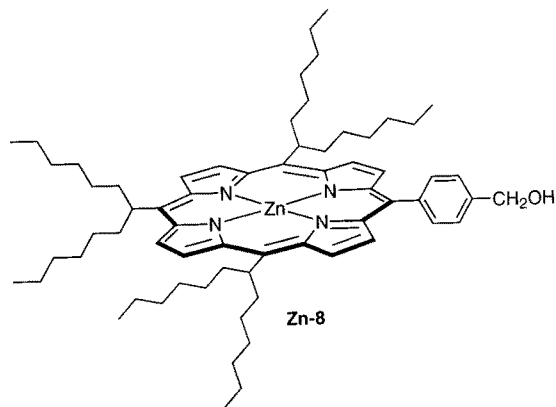

```

/data/chemistry/LINDSEY/SCHWEIKART/030302/1SRef/pdata/1  tof  Wed May 7 12:42:01 2003

```



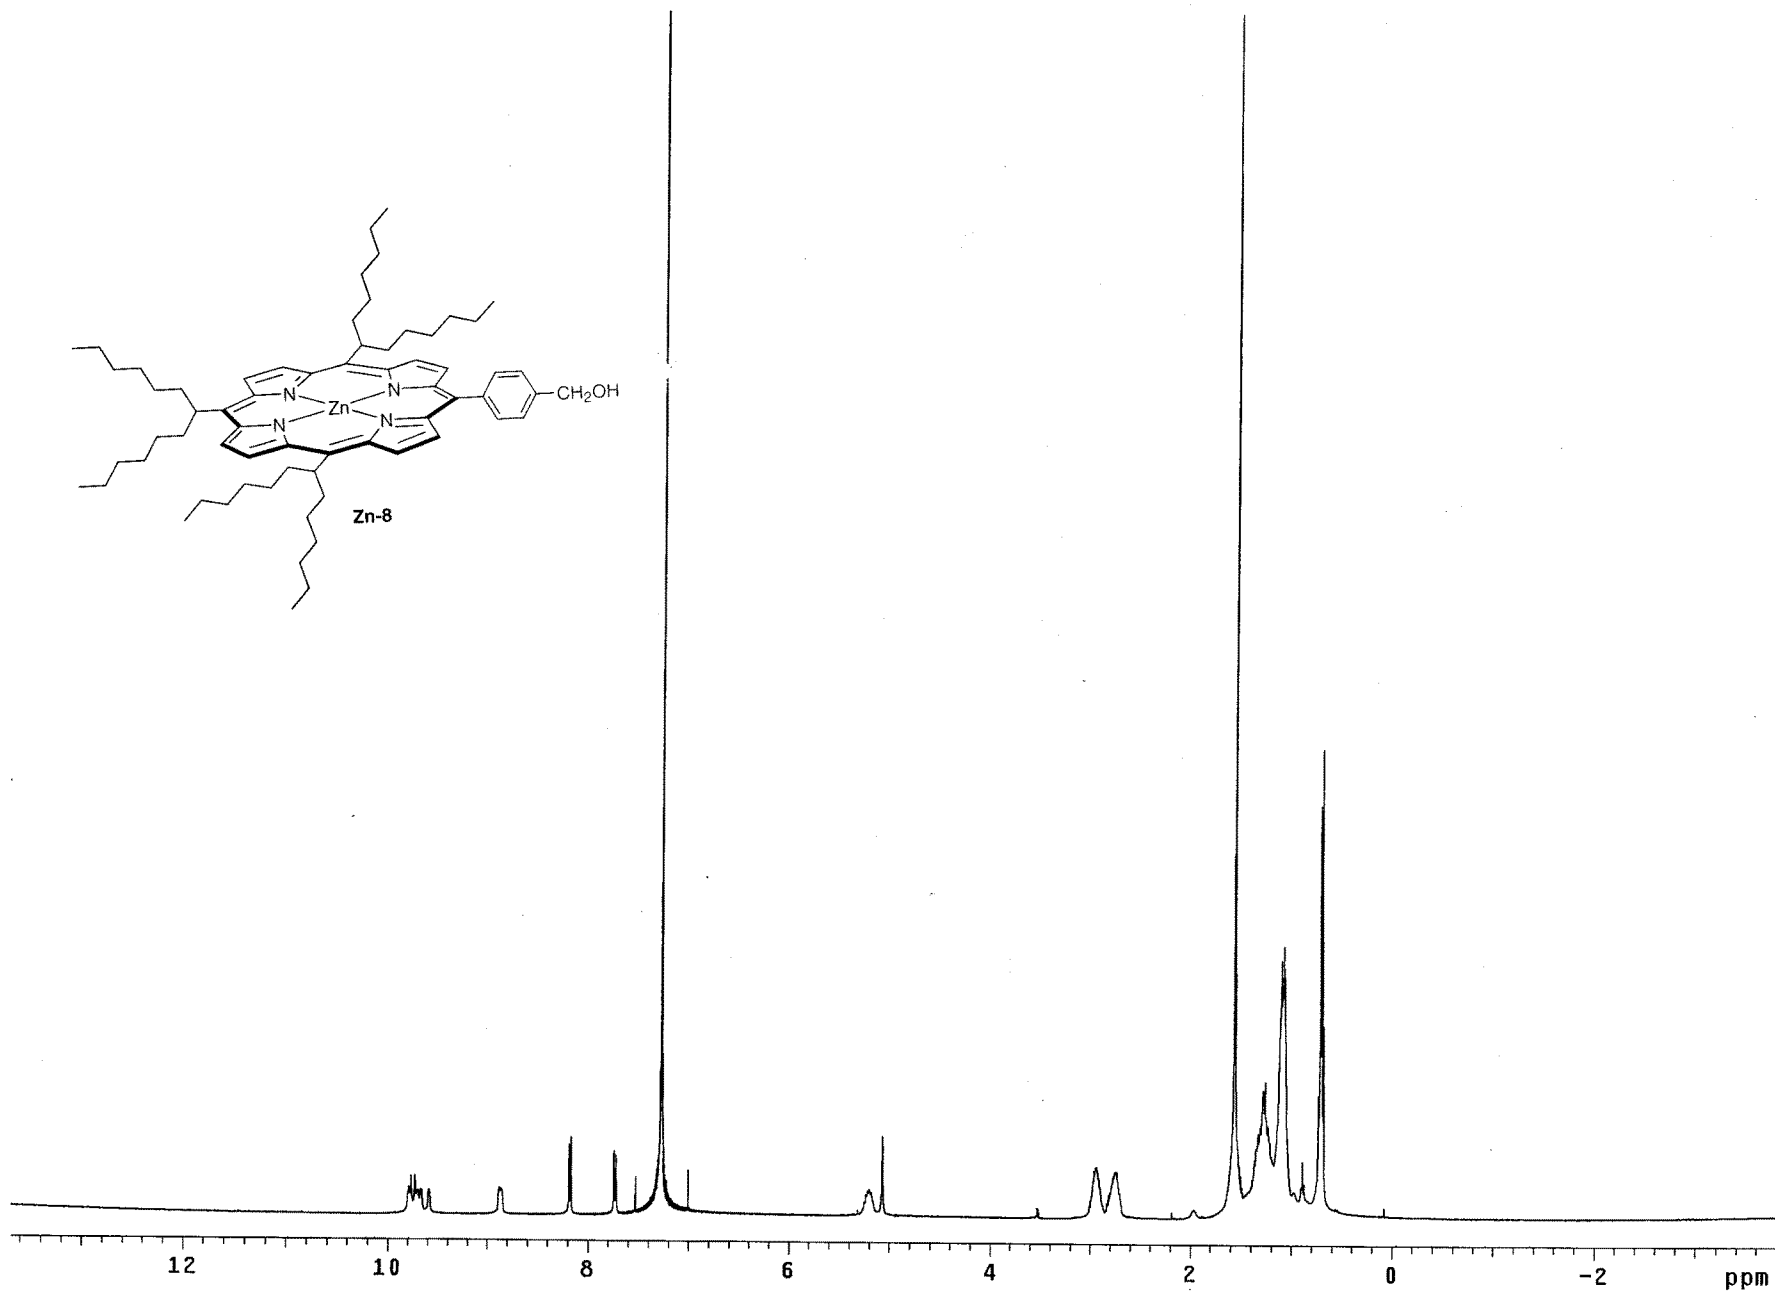



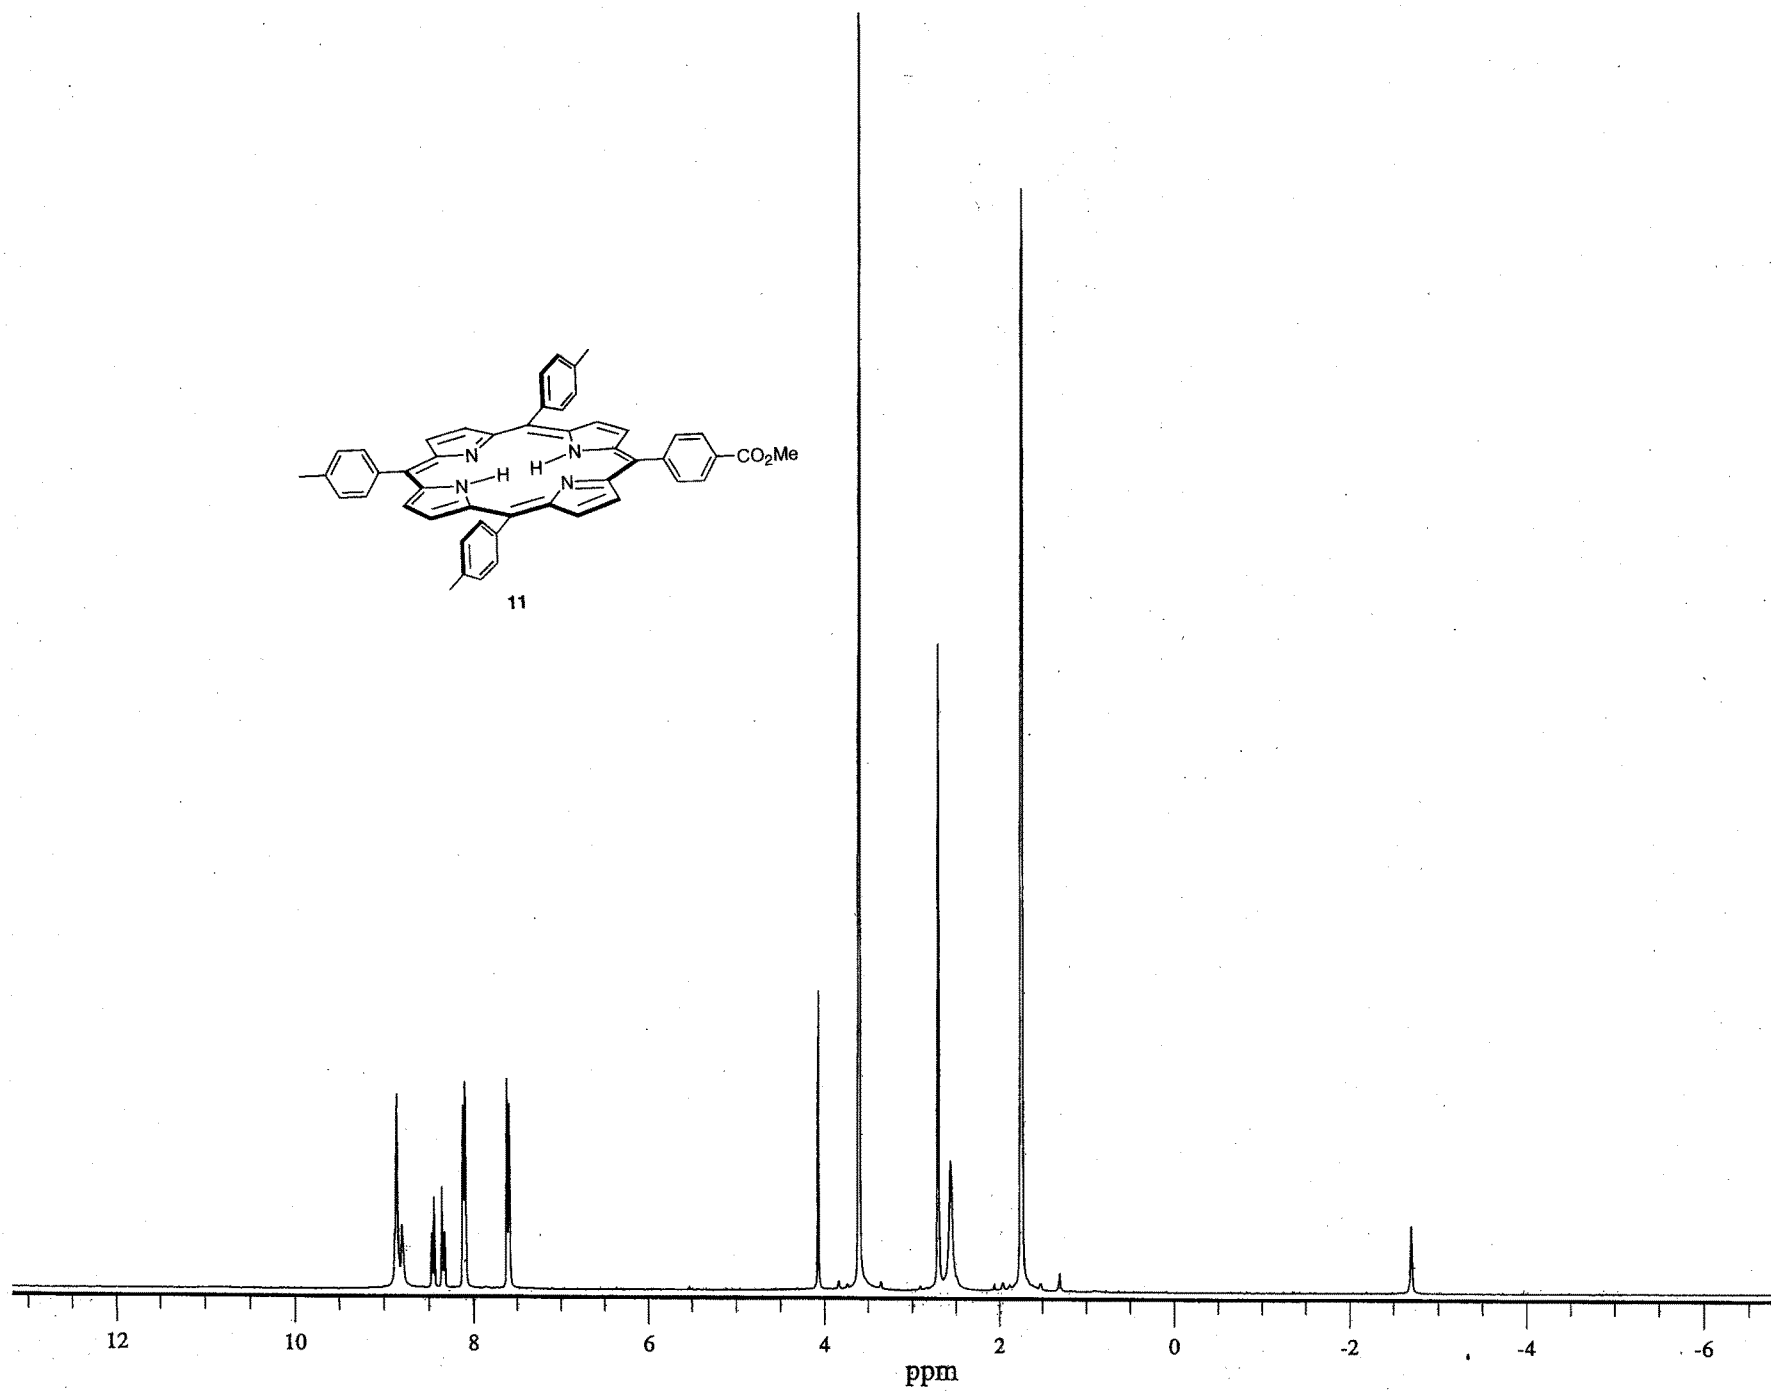

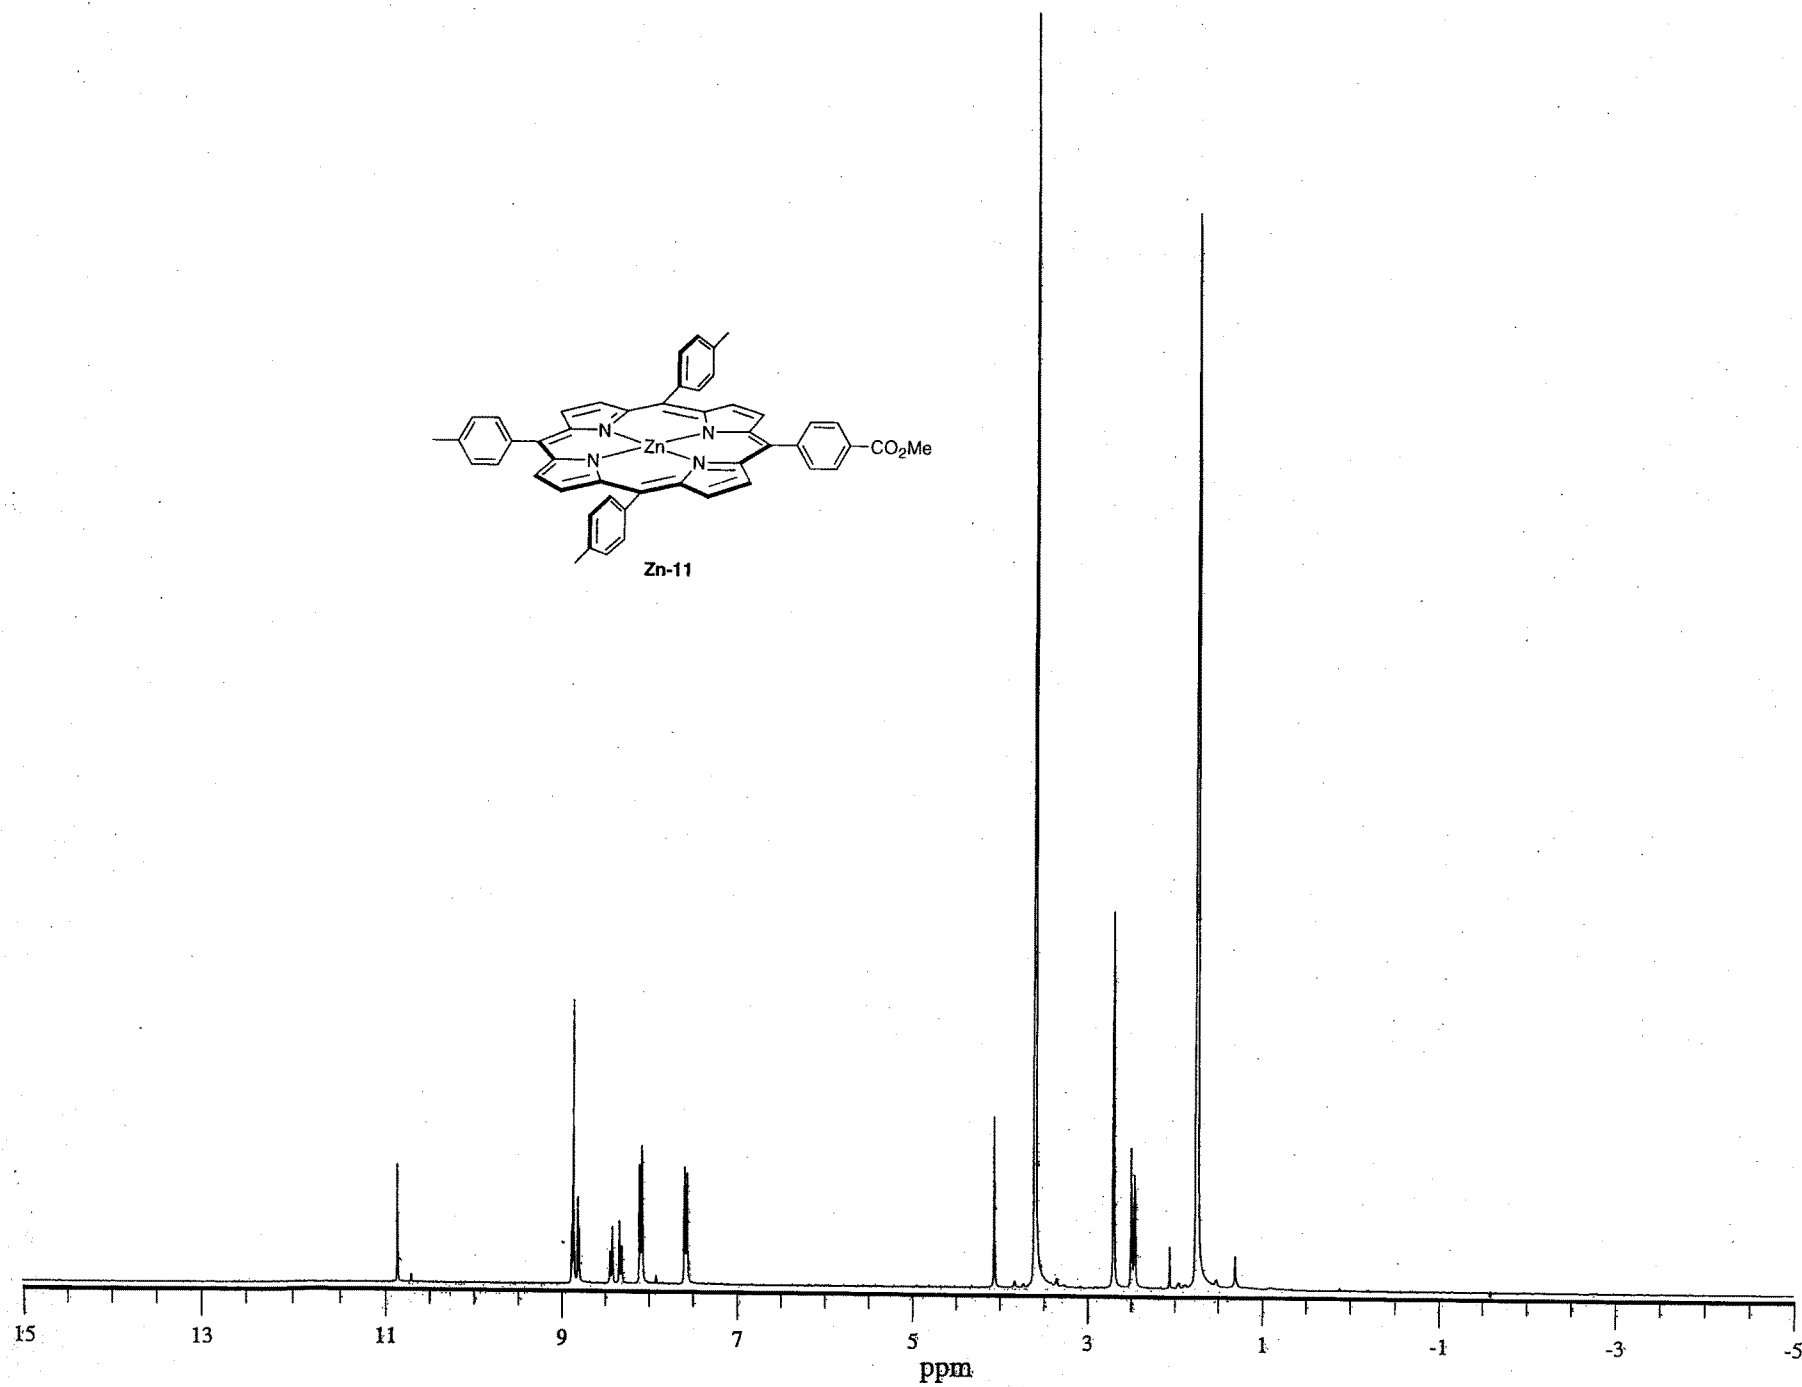

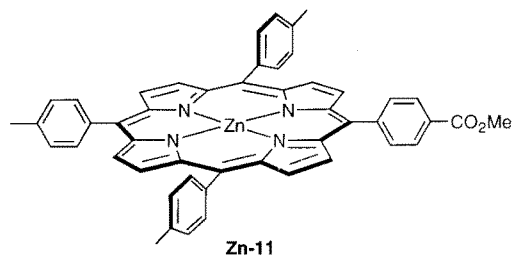

```

200      300      400      500      600      700      800      900      1000      1100      1200      1300      1400      m/z
/data/chemistry/LINDSEY/SCHWEIKART/0148149/1SRef/pdata/1  tof  Mon Mar 12 14:26:19 2001

```

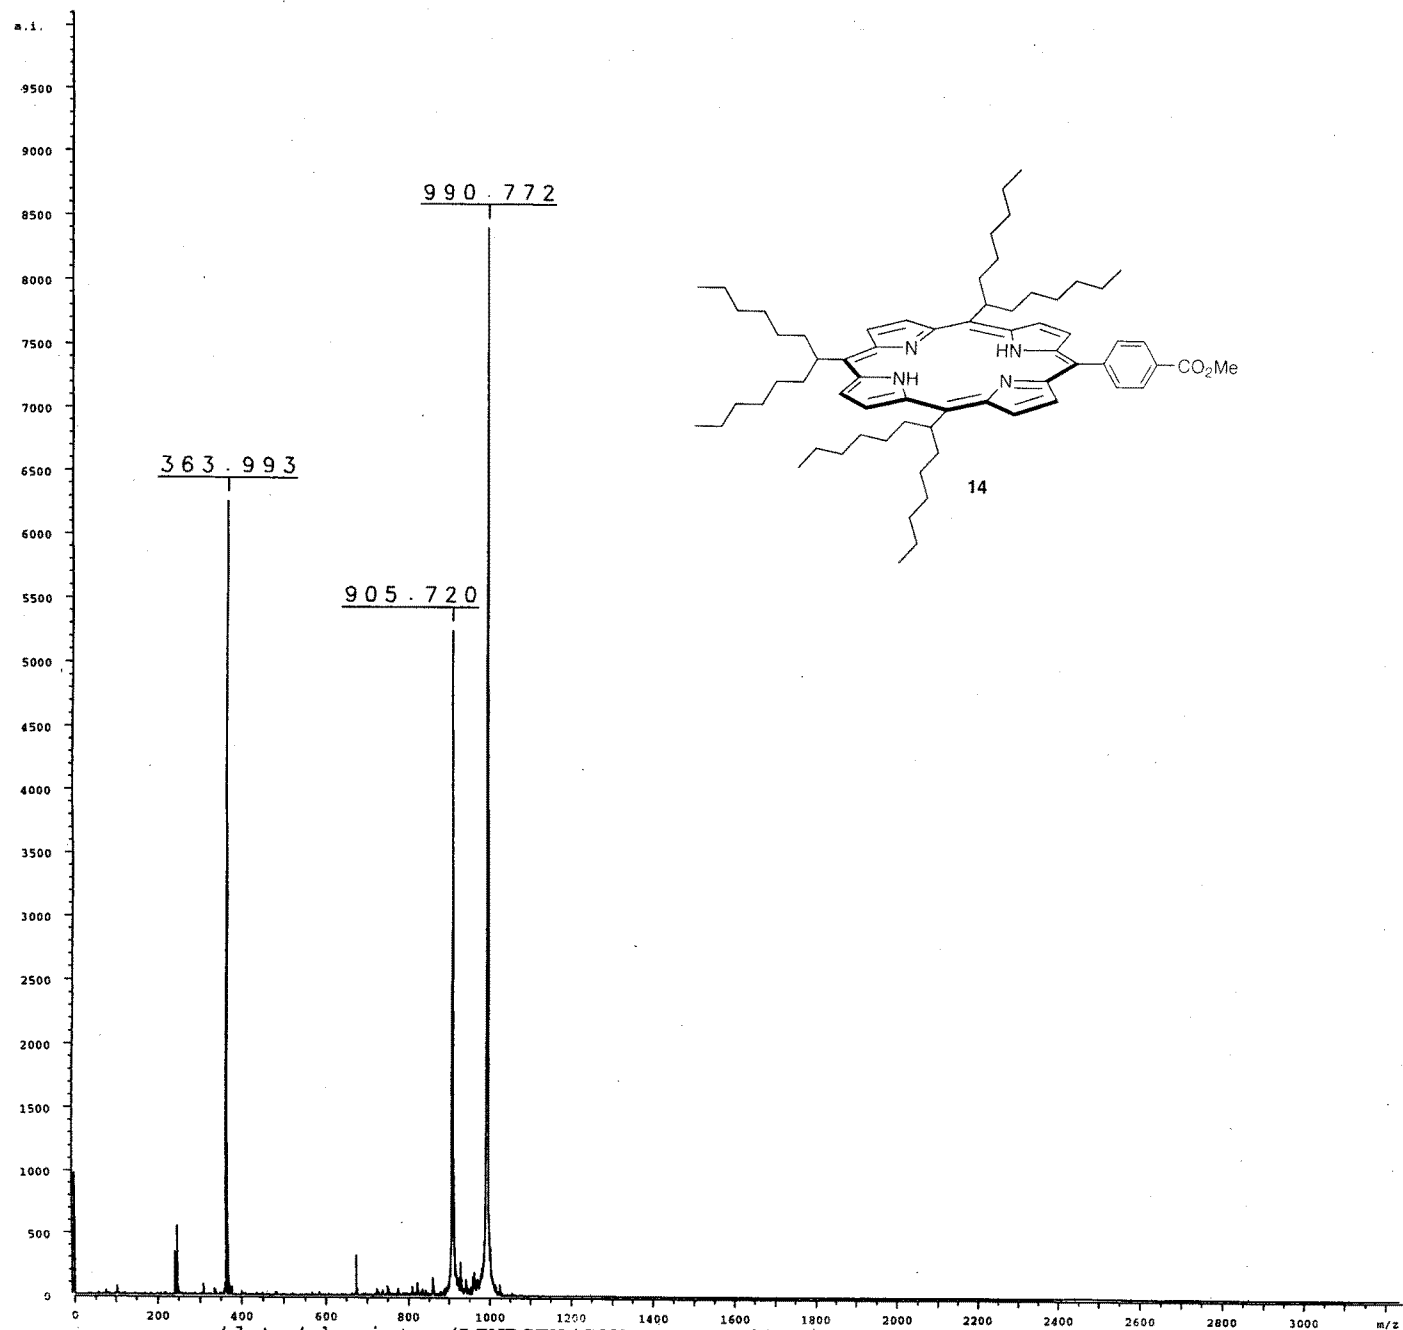

```

INSTRUM TOP
OpId N. Srinivasan
SMPNAM 030303
AQ_DATE Wed May 7 12:29:33 2003
PATH /data/chemistry/LINDSEY/SCHWEIKART
POLARI POS
AQOP_m Reflector
TD 40000
NoSHOTS 80
SMCRUM 0
SMOPTS1 0
SMOPTS2 0
SMOPTS3 0
EW 1.00 [ns]
DELAY 0 [ns]
Uis1 20.00 [kV]
Uis2 18.70 [kV]
Uref1 0.00 [kV]
Uiams 7.50 [kV]
Ulimass 10.00 [kV]
RefFull 0.00 [kV]
UdetL 1.50 [kV]
UdetR 0.00 [kV]
Udefl 2.00 [kV]
REPH2 1.00 [Hz]
ATTEN 54.0
ML1 2067125.193
ML2 333.982
ML3 9.000
RITUREBO no
GDEON yes
GDEEDLY short
DEFLON no
RLNSRND no
LINSRND no
UIS2RND no
DPCAL1 510.84
DPMAS 700.00 [Da]
RENDVAL 0.33
LRENDVAL 0.28
IS2RNDV 0.91
CMT1 Fb1SWT-est (POPOP)
CMT2 MW=991.5206

```

/data/chemistry/LINDSEY/SCHWEIKART/030303/1SRef/pdata/1 tof Wed May 7 12:41:37 2003

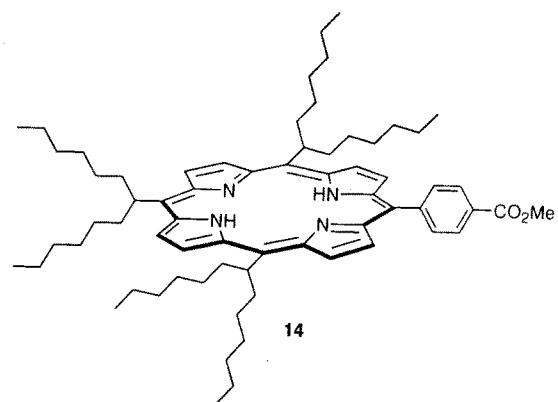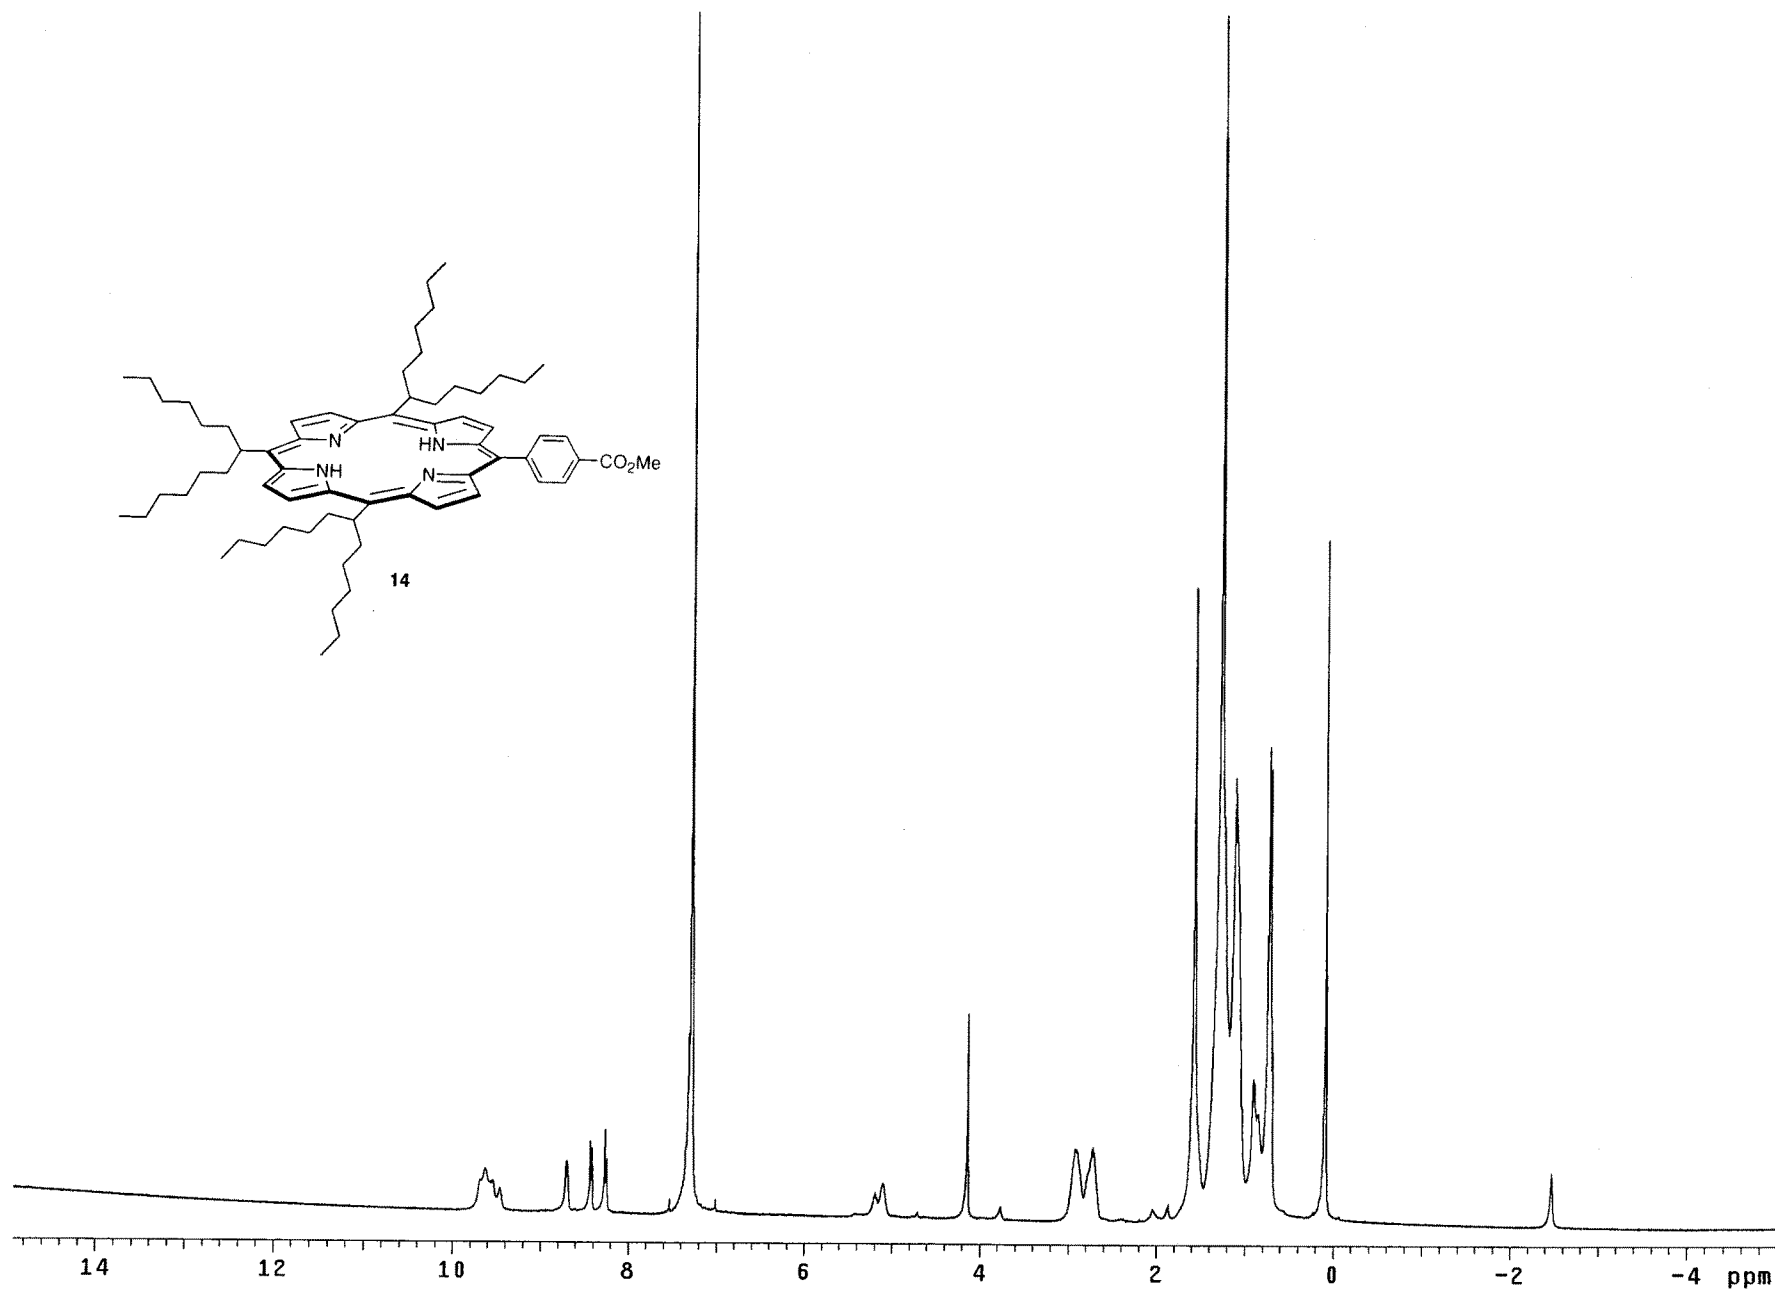

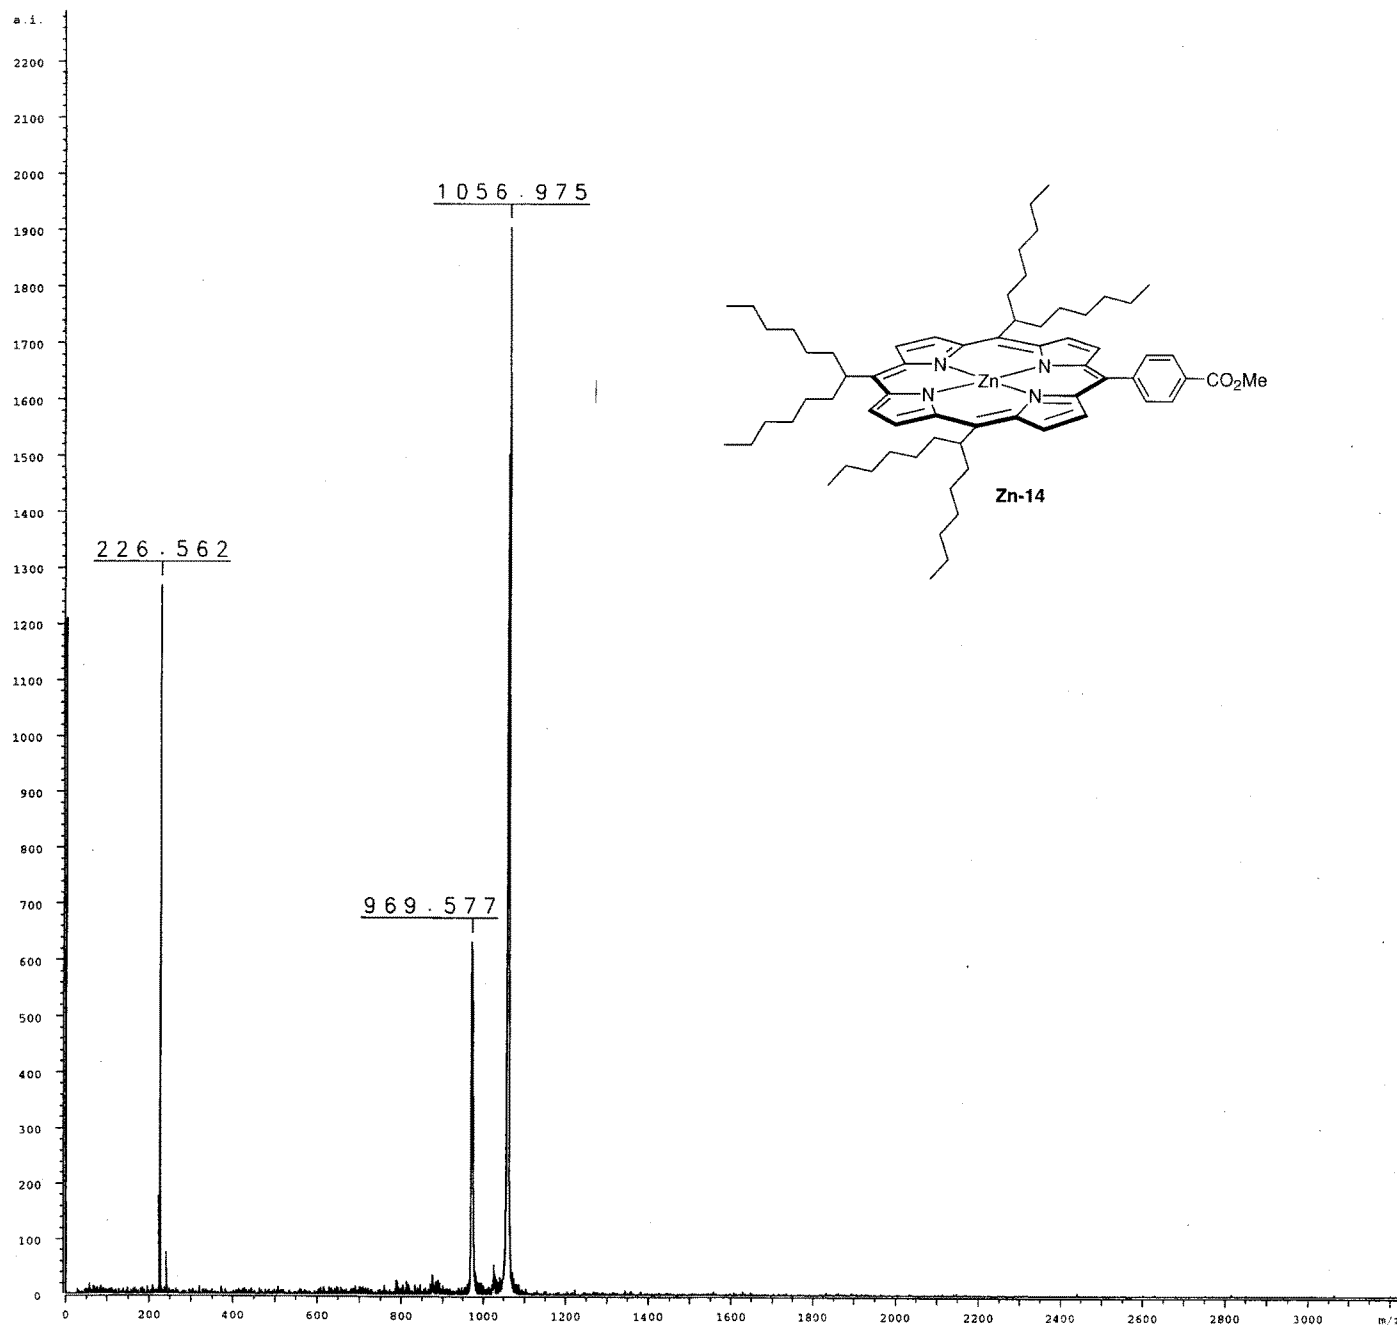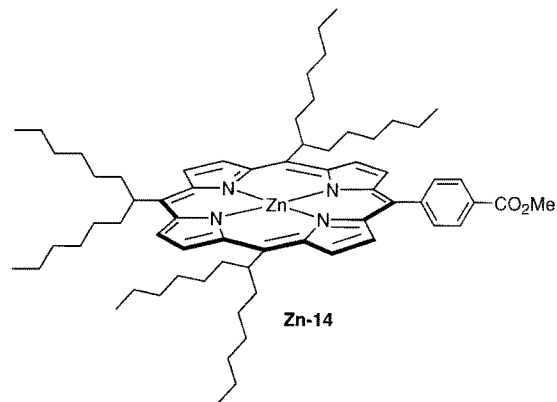

INSTRUM TOP  
 OpId N. Srinivasan  
 SMPNAM 030261  
 AQ\_DATE Tue Apr 15 14:20:59 2003  
 PATH /data/chemistry/LINDSEY/SCHWEIKART  
 POLARI POS  
 AQOP\_n Reflector  
 TD 40000  
 NoSHOTS 100  
 SMOPT1 0  
 SMOPT2 0  
 SMOPT3 0  
 DW 1.00 [ns]  
 DELAY 0 [ns]  
 Uis1 20.00 [kV]  
 Uis2 18.70 [kV]  
 Uref1 0.00 [kV]  
 Uisens 7.50 [kV]  
 Ulimass 10.00 [kV]  
 RefPull 0.00 [kV]  
 UdetL 1.50 [kV]  
 UdetR 1.55 [kV]  
 Udef1 2.00 [kV]  
 REPfHZ 1.00 [Hz]  
 APTEZ 38.9  
 ML1 2064271.968  
 ML2 342.177  
 ML3 0.000  
 HITVRBO no  
 GDEON yes  
 GDEELY short  
 DEFLON no  
 RINSRND no  
 LINSRND no  
 UIS2RND no  
 DPCALL 510.84  
 DPMASS 700.00 [Da]  
 RENDVAL 0.13  
 LENDVAL 0.28  
 IS2RNDV 0.91  
 CMT1 3SWTCOOMe (dithranol)  
 CMT2 1054.8947

/data/chemistry/LINDSEY/SCHWEIKART/030261/1SRef/pdata/1 tof Tue Apr 15 14:21:26 2003



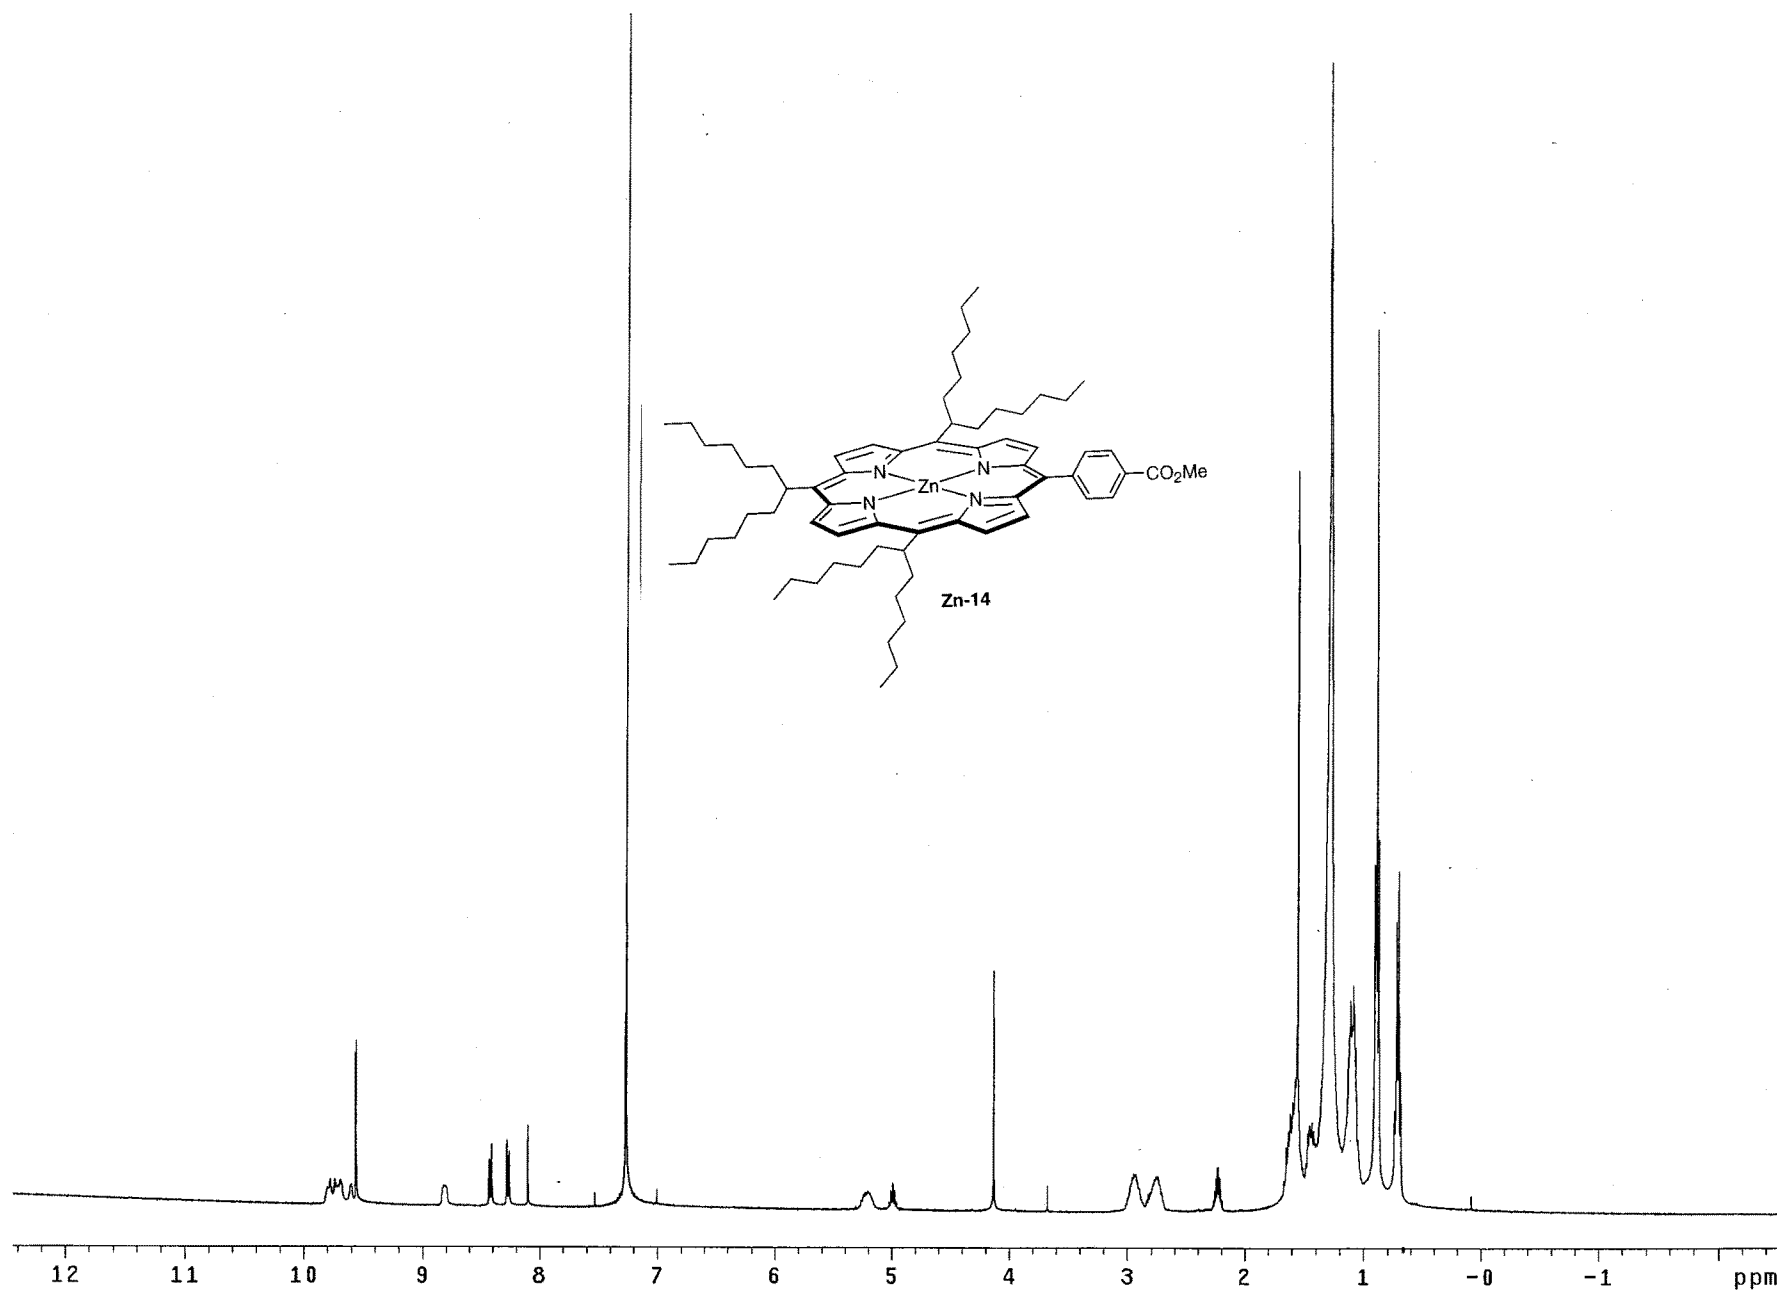

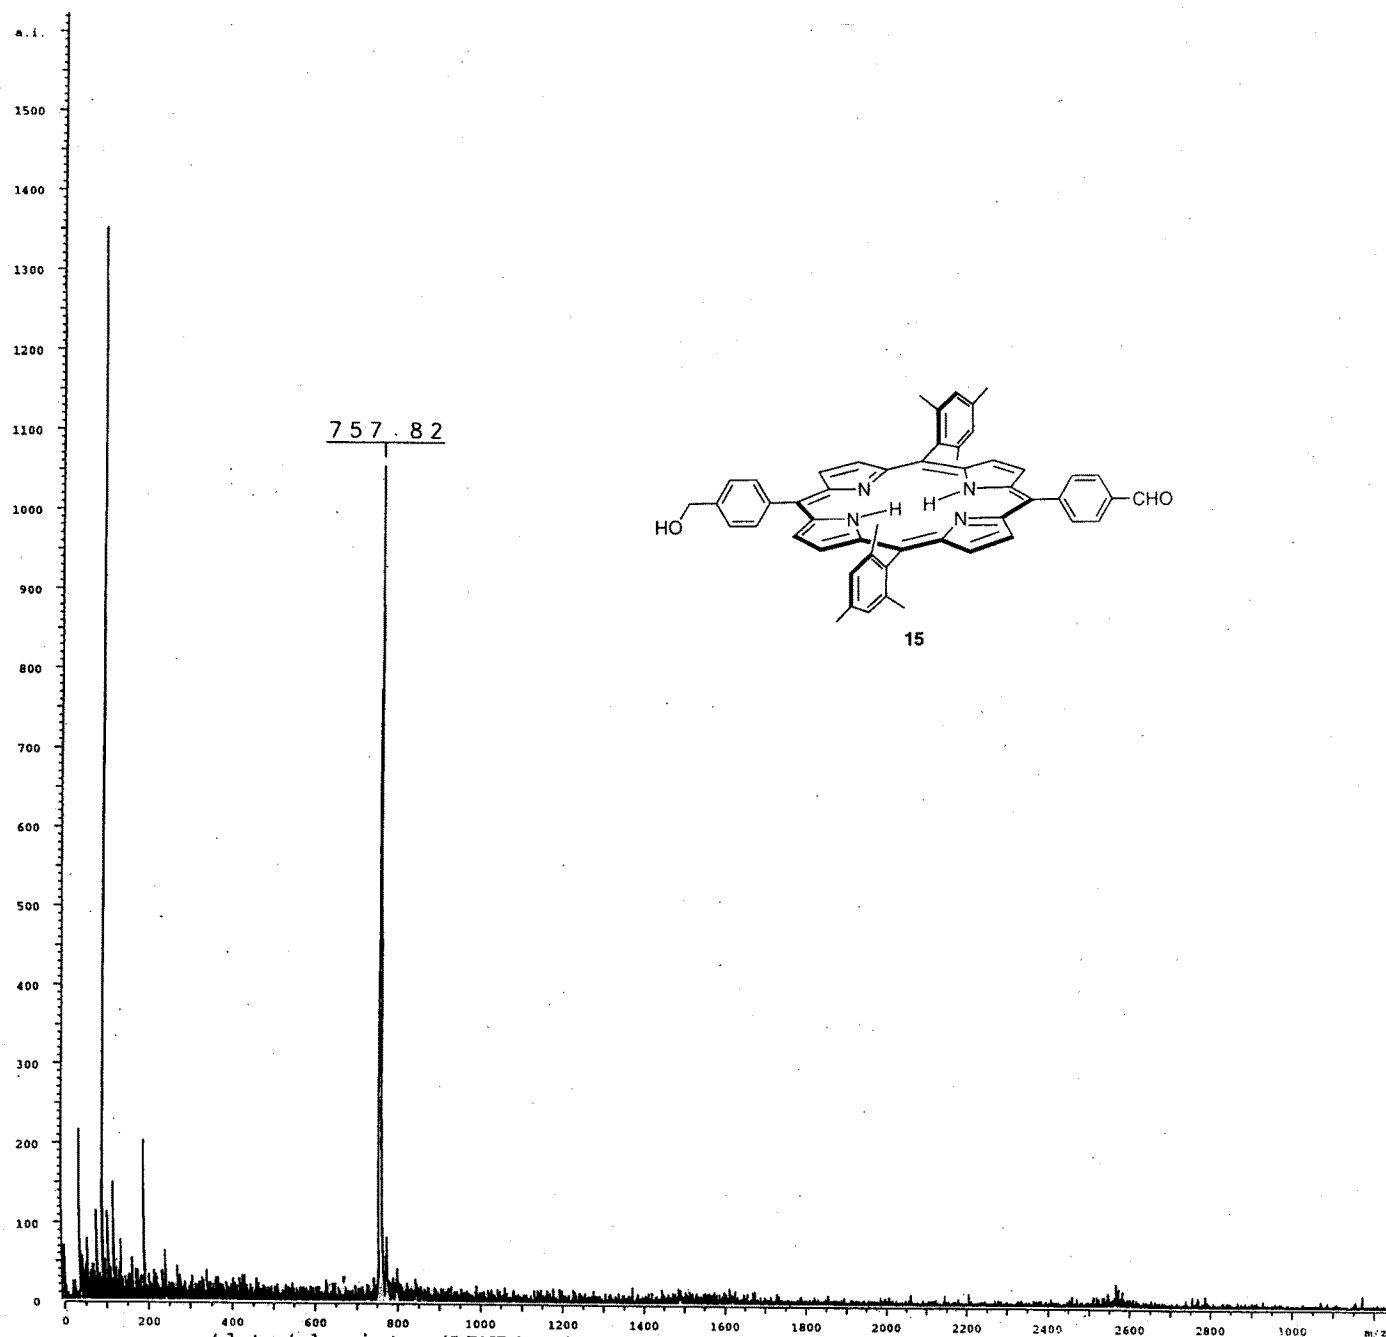

```

INSTRUM TOP
OpId N. Srinivasan
SMPNAM 020462
AQ_DATE Mon Apr 22 10:06:23 2002
PATH /data/chemistry/LINDSEY/MALYNOVSKYY
POLARI POS
AQOP_m Reflector
TD 40000
NoSHOTS 9
SMONUM 0
SMOPTS1 0
SMOPTS2 0
SMOPTS3 0
DW 1.00 [ns]
DELAY 0 [ns]
Uis1 20.00 [KV]
Uis2 18.70 [KV]
Uref1 0.00 [KV]
Ulen5 7.50 [KV]
Uhimass 10.00 [KV]
RefPull 0.00 [KV]
UdetL 1.50 [KV]
UdetR 0.00 [KV]
Udef1 2.00 [KV]
REPHZ 1.00 [Hz]
ATTEN 31.0
ML1 2067125.193
ML2 333.982
ML3 0.000
HITURBO no
GDEON yes
GDEDLY short
DEFLON no
RLNSBND no
LLNSBND no
UIS2BND no
DPCAL1 510.84
DPMAS5 700.00 [Da]
RBNDVAL 0.33
LBNDVAL 0.28
IS2BNDV 0.91
CNT1 target 8
CNT2 shots =9, attn = 31

```

/data/chemistry/LINDSEY/MALYNOVSKYY/020462/2SRef/pdata/1 tof Mon Apr 22 10:06:41 2002

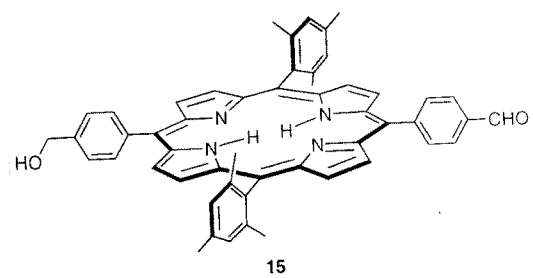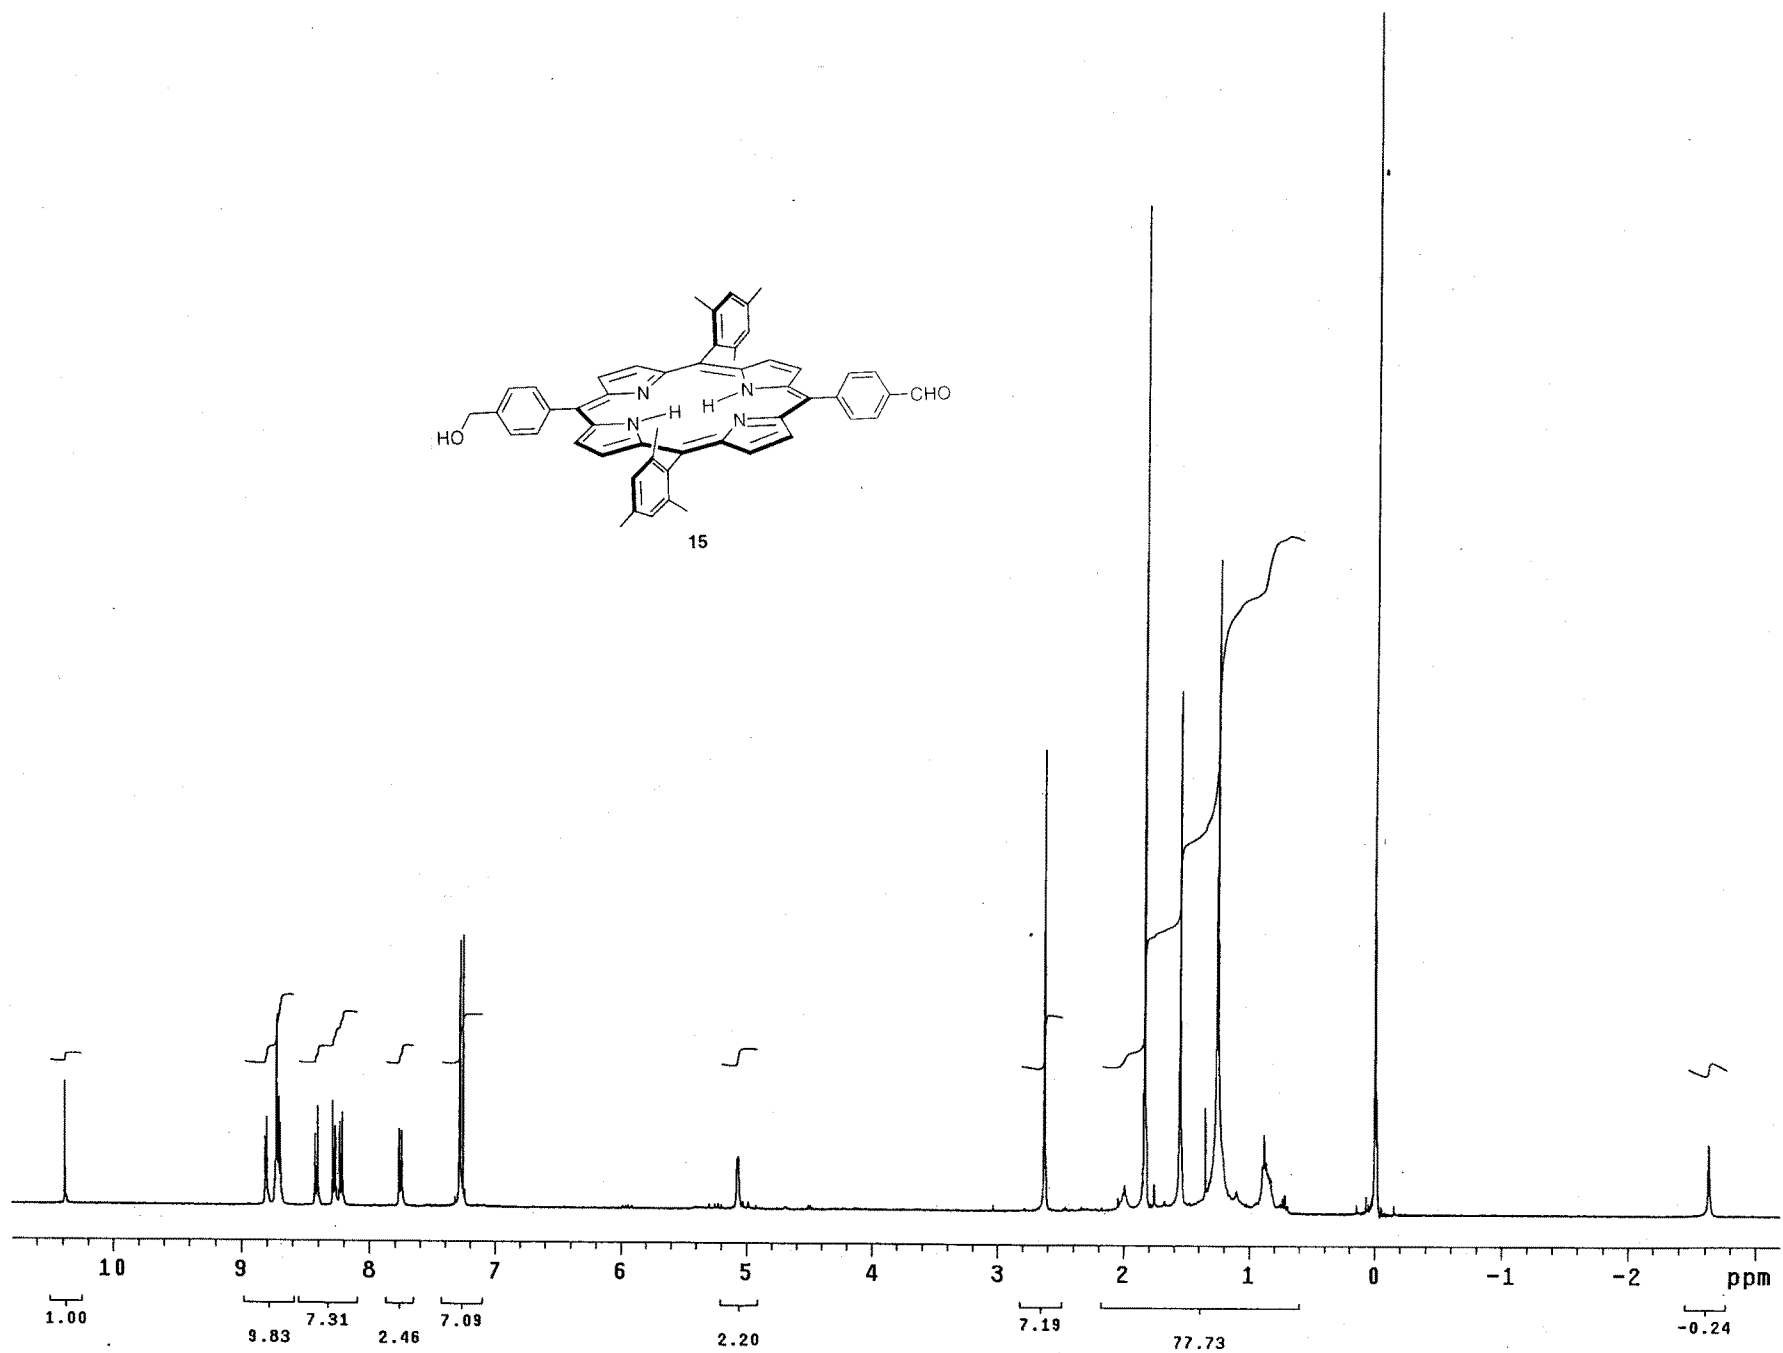

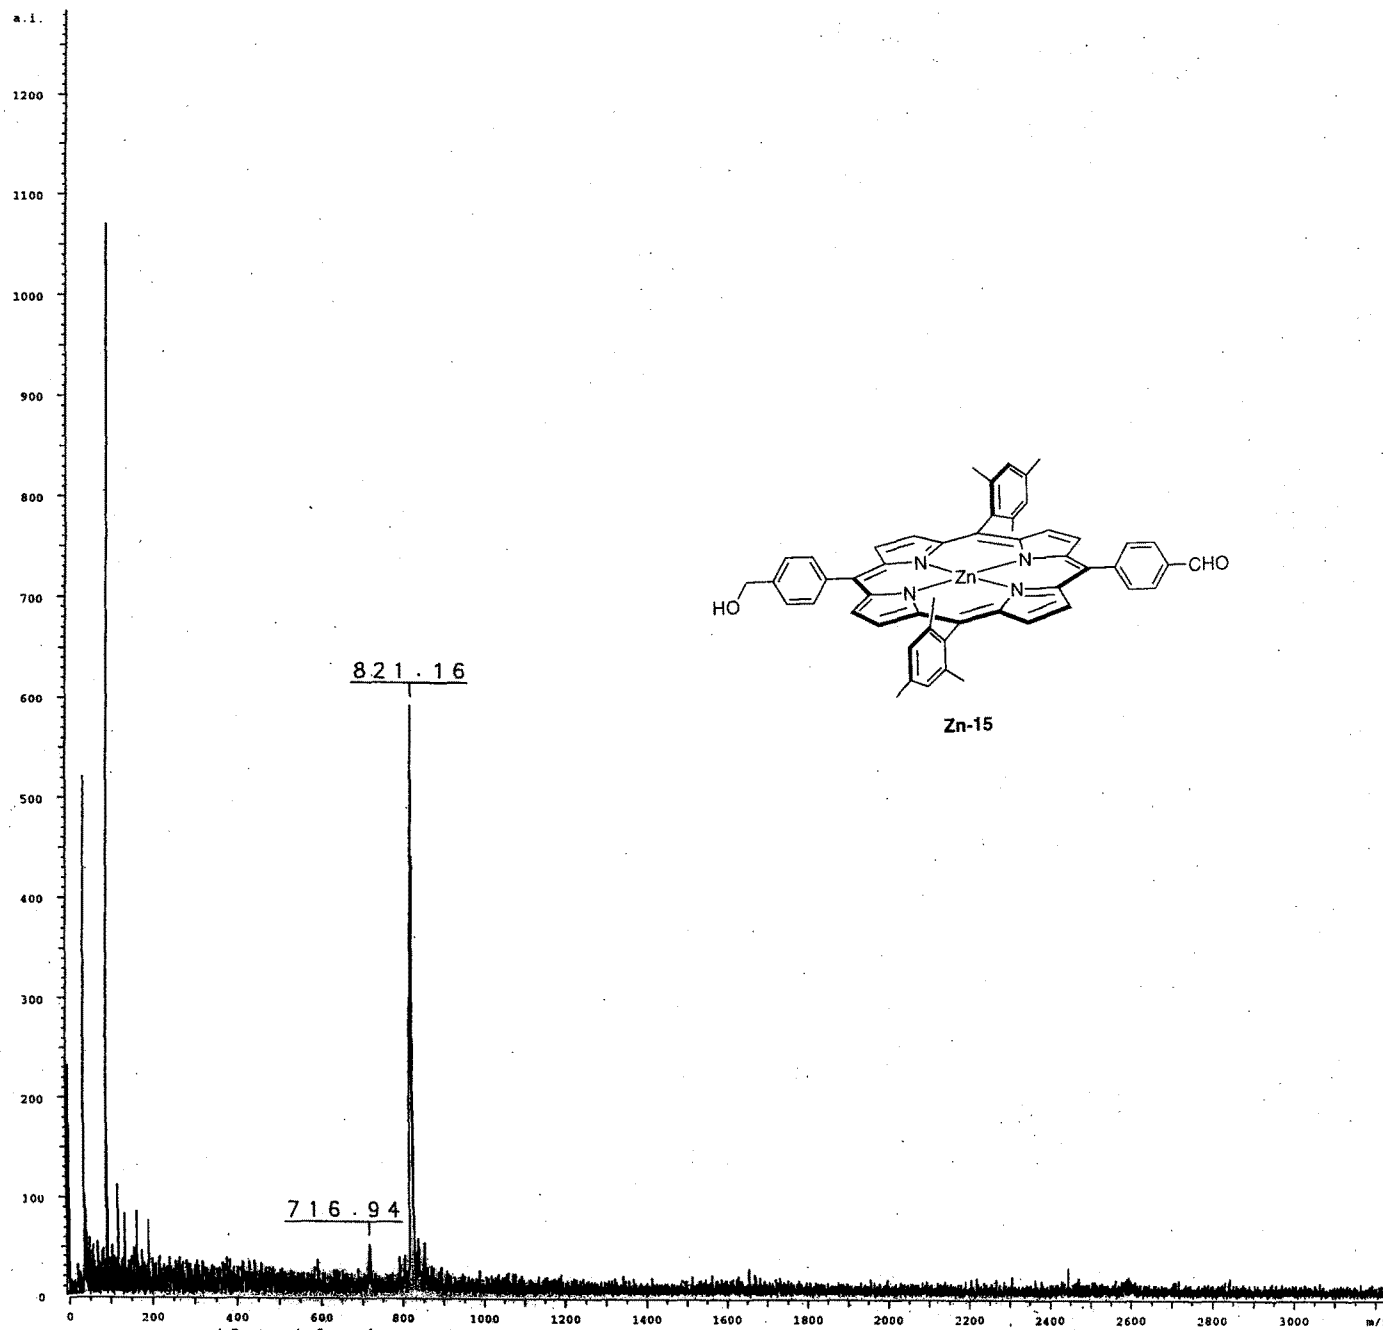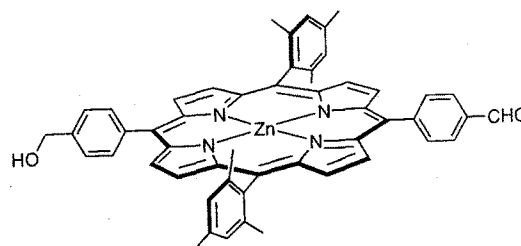

Zn-15

```

INSTRUM TOP
OpId N. Srinivasan
SMPNAM 020462
AQ_DATE Mon Apr 22 10:04:37 2002
PATH /data/chemistry/LINDSEY/MALYNOVSKYY
POLARI POS
AQOP_m Reflector
TD 40000
NoSHOTS 30
SMORUM 0
SMOPTS1 0
SMOPTS2 0
SMOPTS3 0
DW 1.00 [ns]
DELAY 0 [ns]
Uis1 20.00 [KV]
Uis2 18.70 [KV]
Uref1 0.00 [KV]
Ulen5 7.50 [KV]
Uhimass 10.00 [KV]
RefPull 0.00 [KV]
UdetL 1.50 [KV]
UdetR 0.00 [KV]
Udefl 2.00 [KV]
REPHZ 1.00 [Hz]
ATTEN 31.0
ML1 2067125.193
ML2 333.982
ML3 0.000
HITURBO no
GDEON yes
GDEELY short
DEFLON no
RLNSBND no
LLNSBND no
UIS2BND no
DPCAL1 510.84
DPWASS 700.00 [Da]
RBNDVAL 0.33
LBNDVAL 0.28
IS2BNDV 0.91
CMT1 target 6
CMT2 shots =30, attn = 31

```

/data/chemistry/LINDSEY/MALYNOVSKYY/020462/1SRef/pdata/1 tof Mon Apr 22 10:05:05 2002

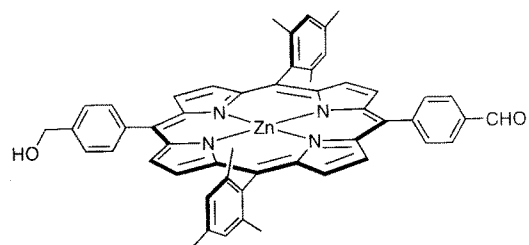

Zn-15

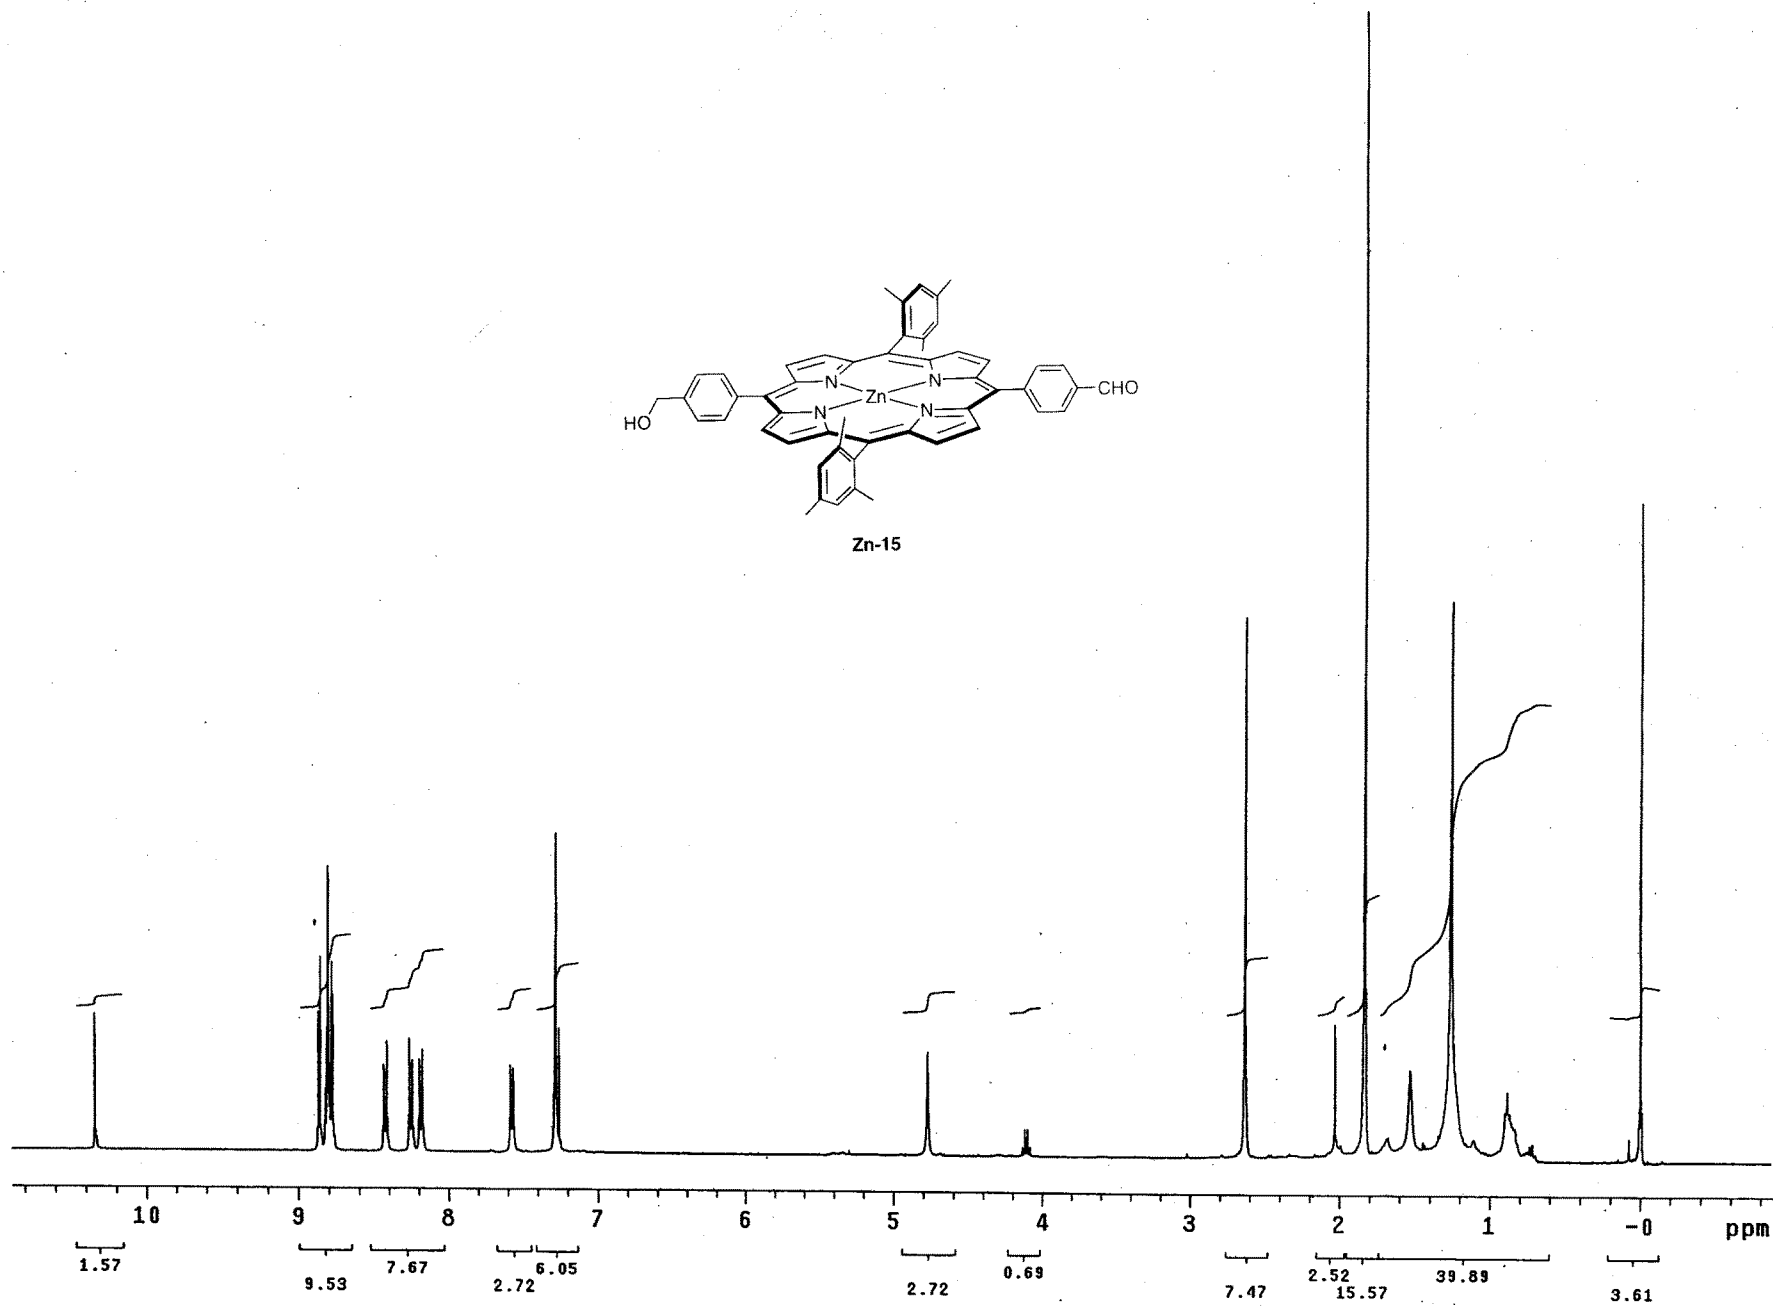

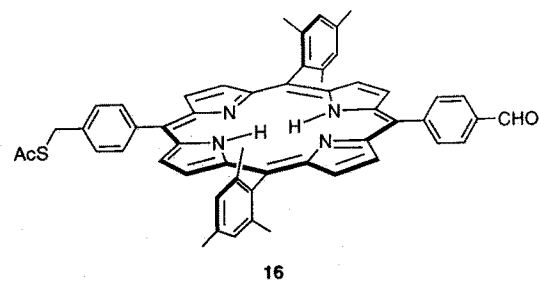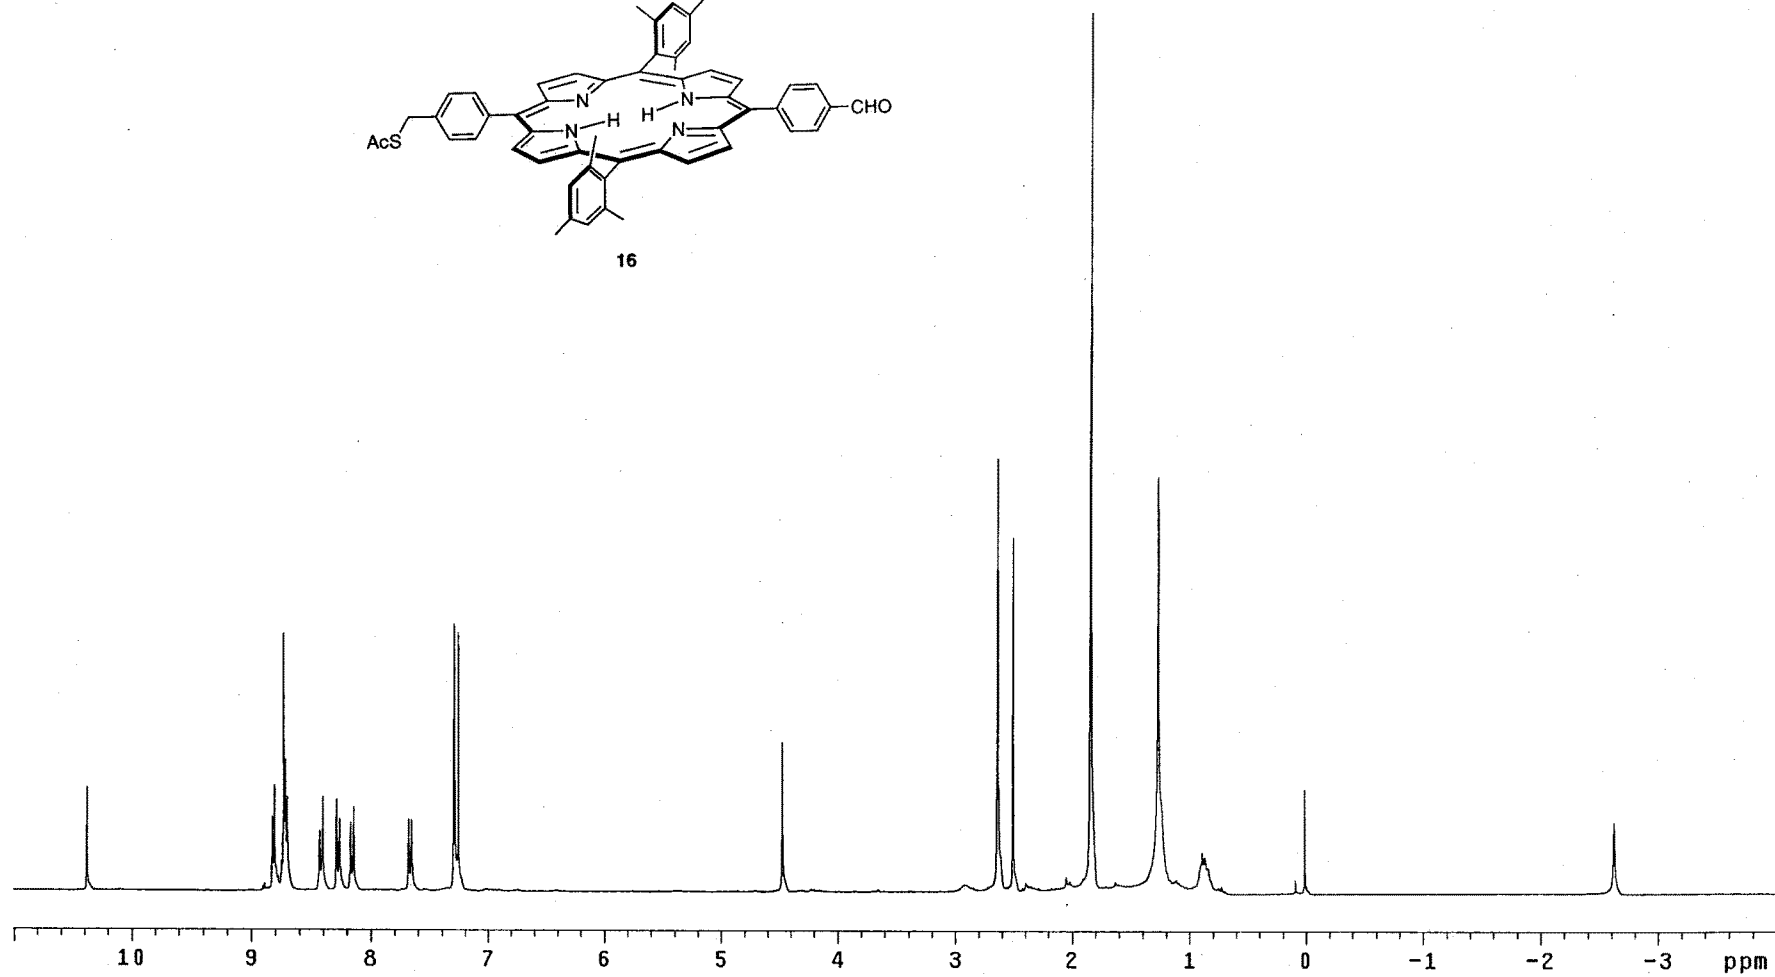

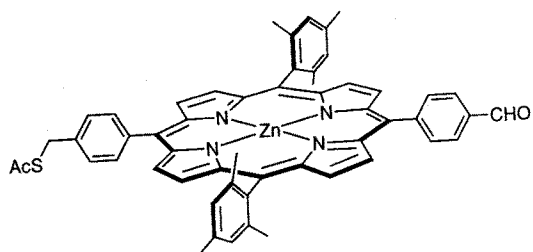

**Zn-16**

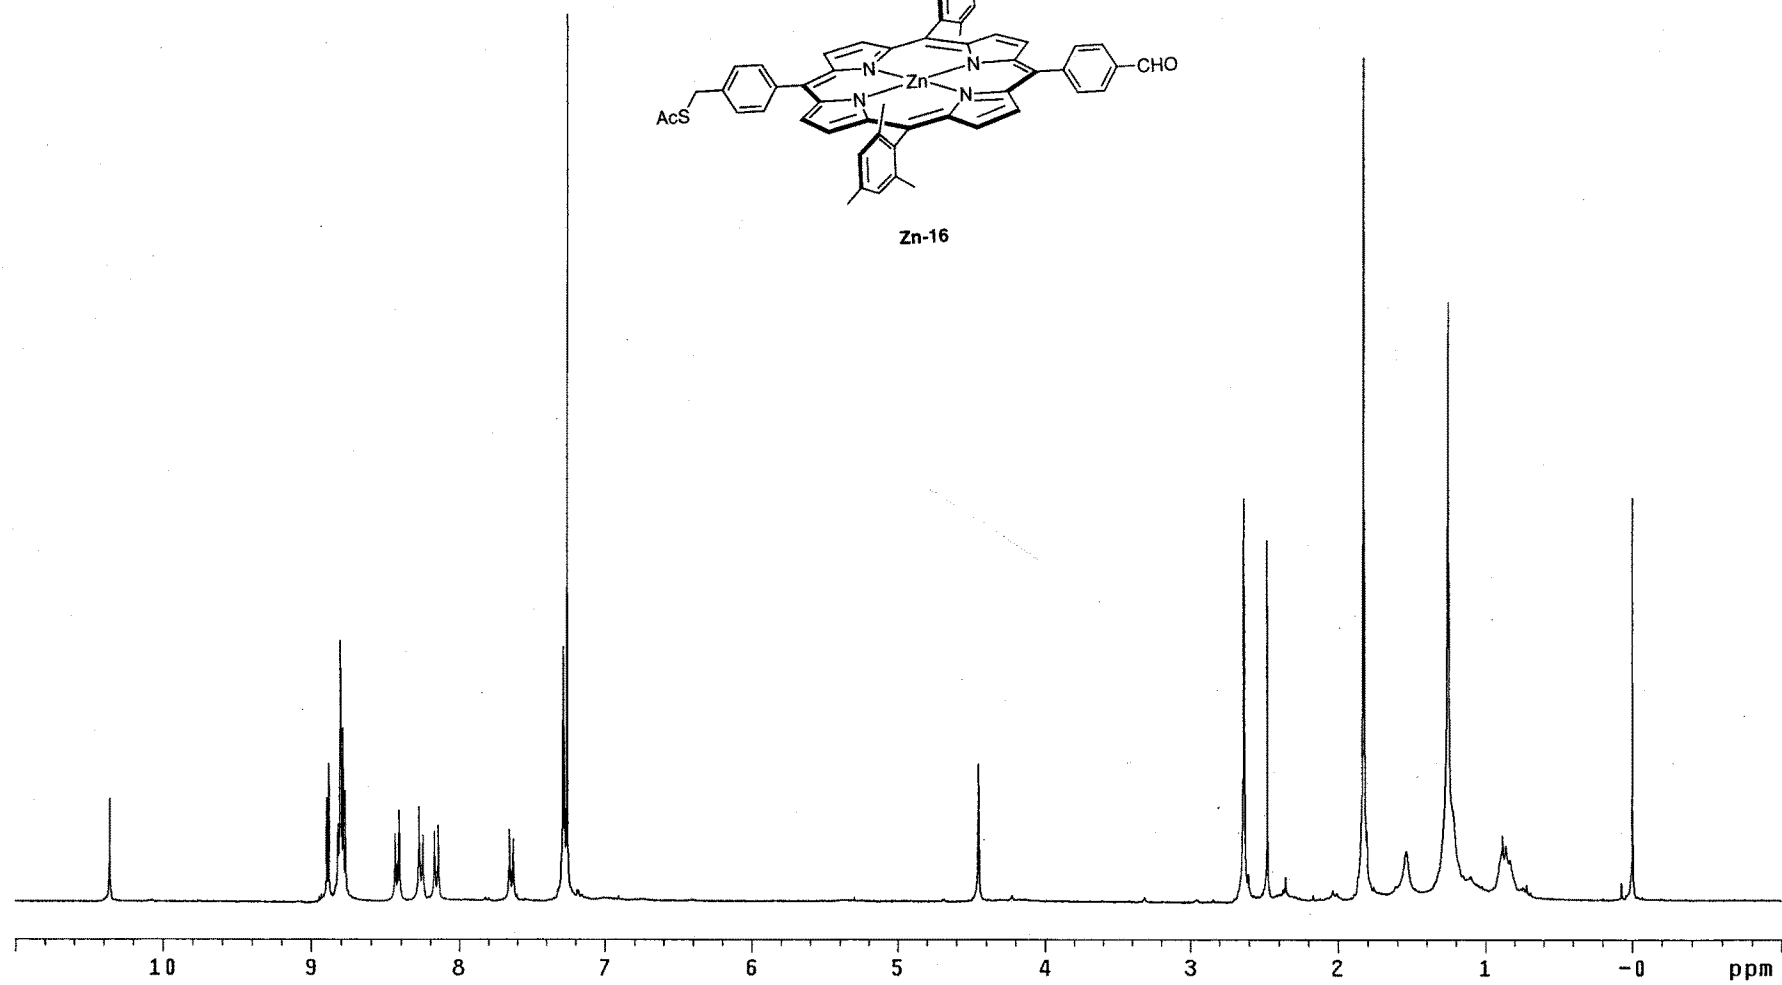

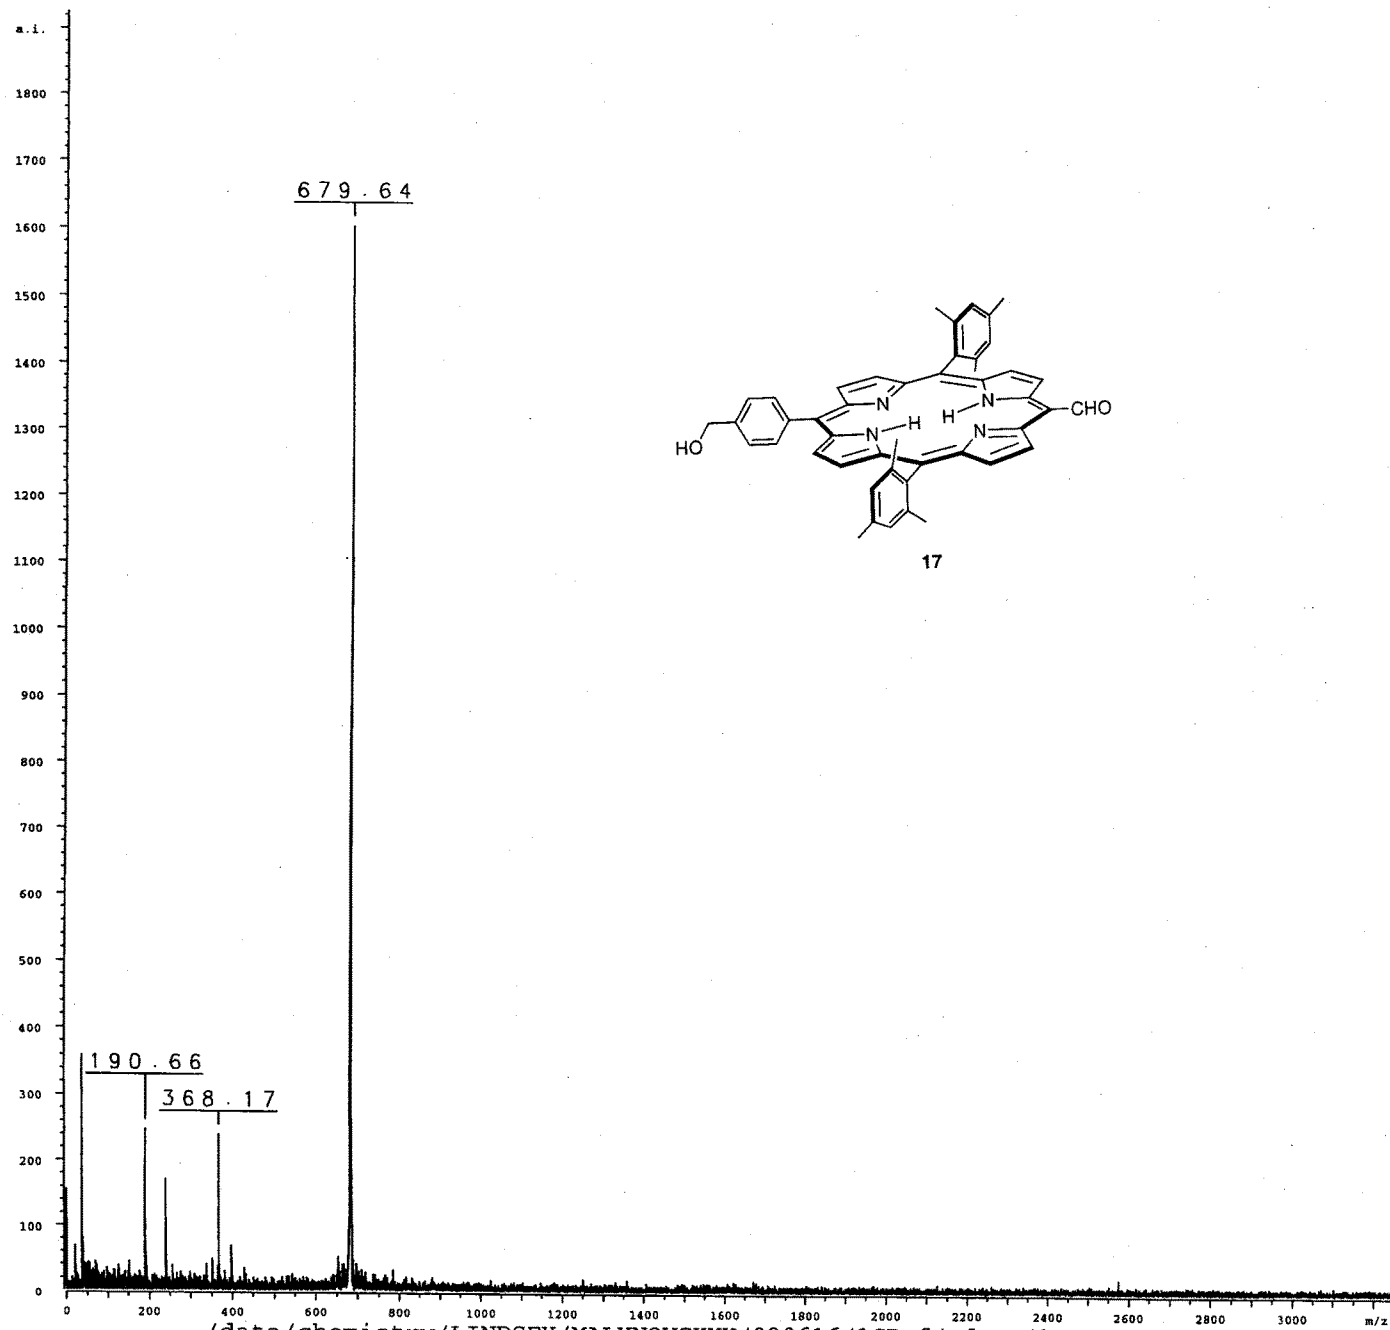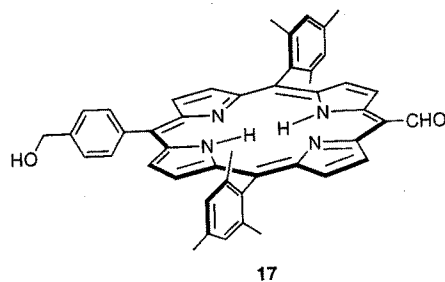

```

INSTRUM TOF
OpId N. Srinivasan
SMPNAM 020616
AQ_DATE Tue May 28 14:14:42 2002
PATH /data/chemistry/LINDSEY/MALYNOSKY
POLARI POS
AQOP_m Reflector
TD 40000
NoSHOTS 28
SMONUM 0
SMOPTS1 0
SMOPTS2 0
SMOPTS3 0
DW 1.00 [ns]
DELAY 0 [ns]
Uls1 20.00 [kV]
Uls2 18.70 [kV]
Uref1 0.00 [kV]
Ulenz 7.50 [kV]
Uhimass 10.00 [kV]
RefPull 0.00 [kV]
UdetL 1.50 [kV]
UdetR 0.00 [kV]
Udef1 2.00 [kV]
REPHZ 1.00 [Hz]
ATTEN 33.0
ML1 2068825.350
ML2 331.982
ML3 0.000
HITURBO no
GDEON yes
ODEELY short
DEFLON no
RLSEND no
LLSEND no
UISEND no
DPCAL1 510.84
DPMAS 700.00 [Da]
RBNVAL 0.33
LBNVAL 0.28
IS2BNDV 0.91
CMT1 suruki coupling after column
CMT2 att 33 shot 28

```

/data/chemistry/LINDSEY/MALYNOSKY/020616/1SRef/pdata/1 tof Tue May 28 14:15:28 2002



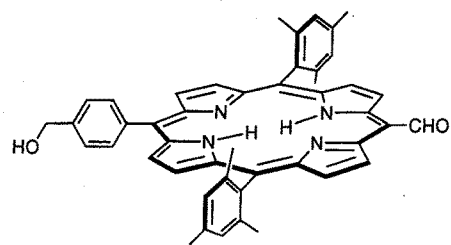

17

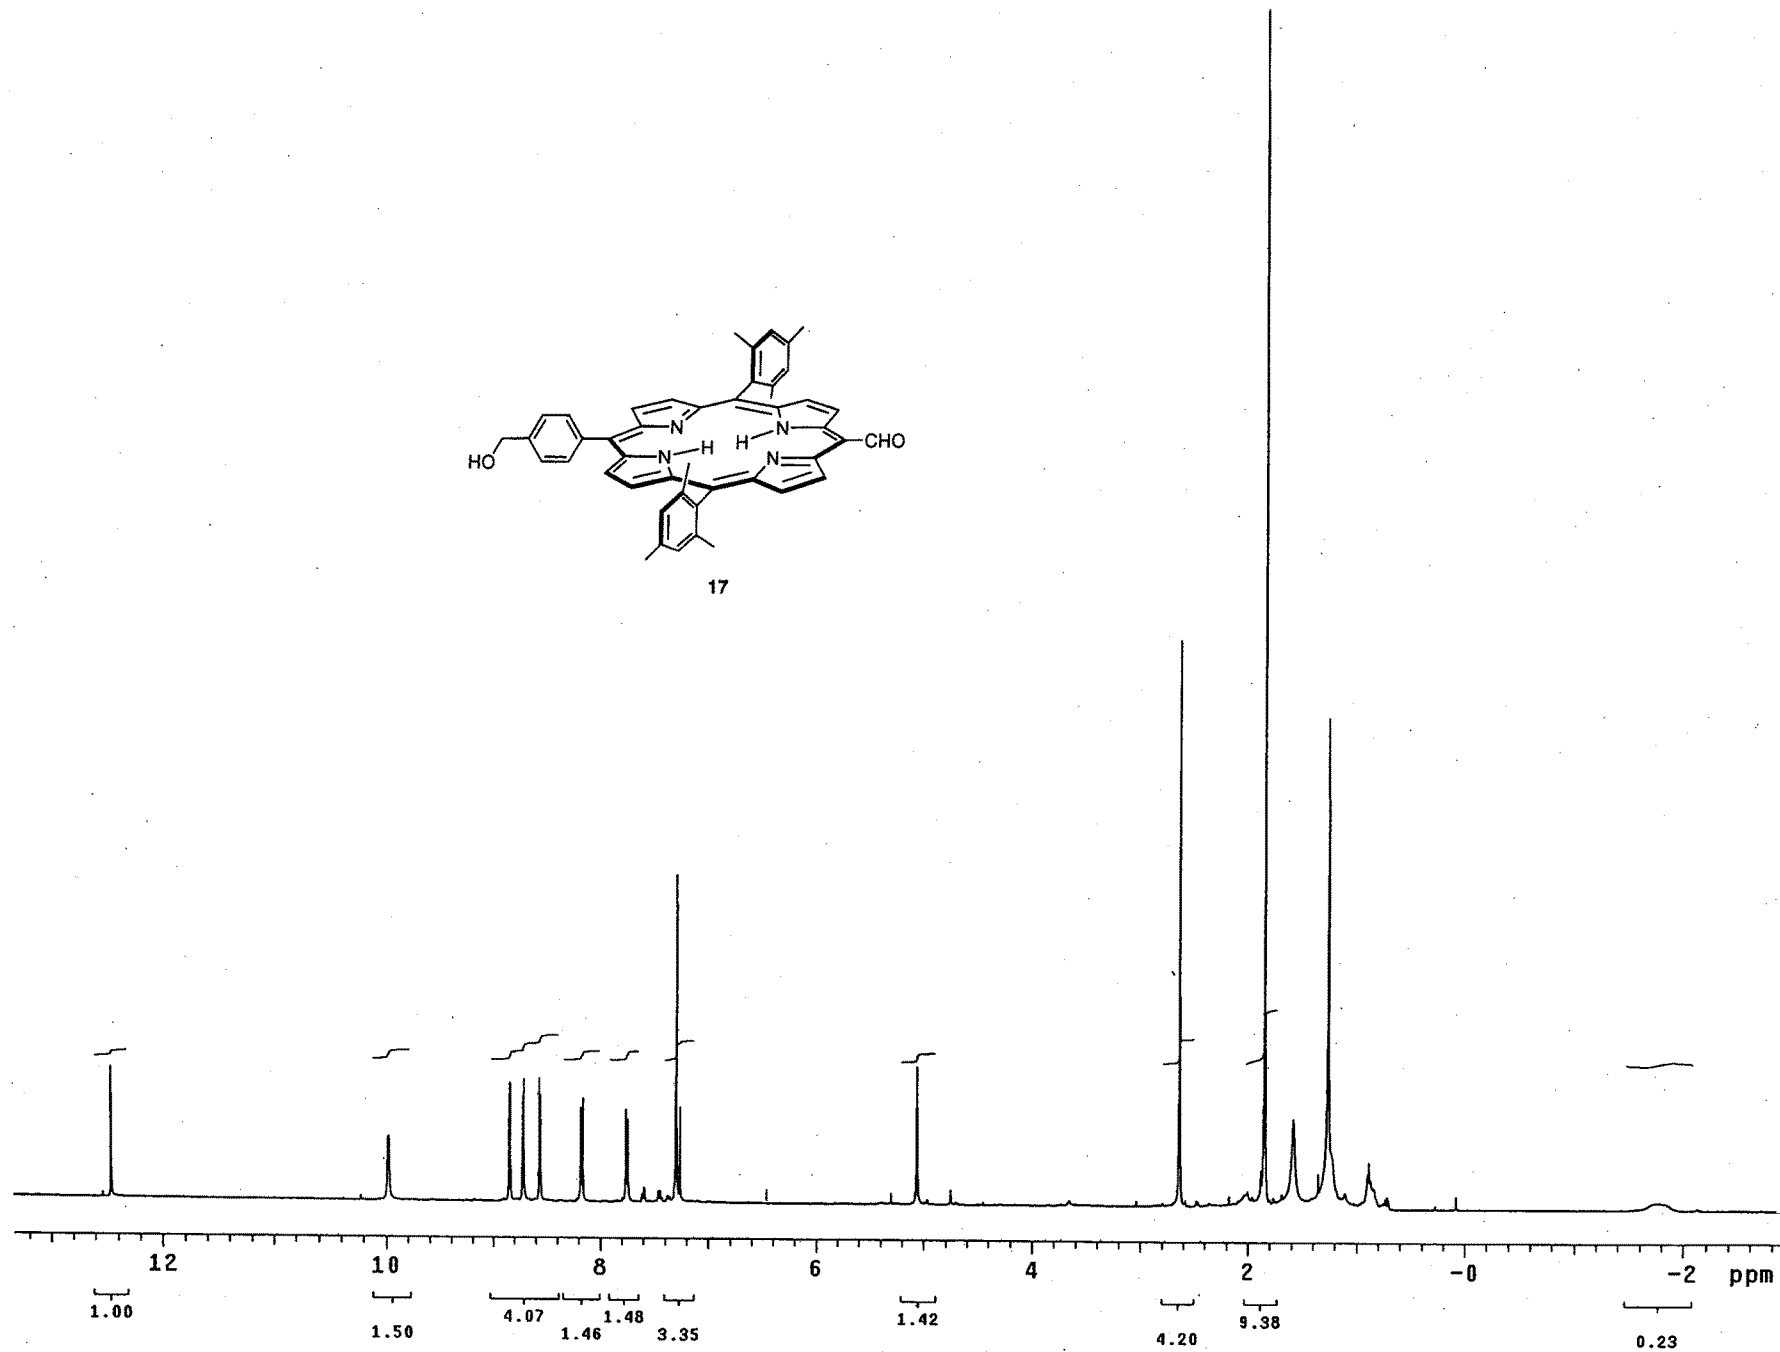

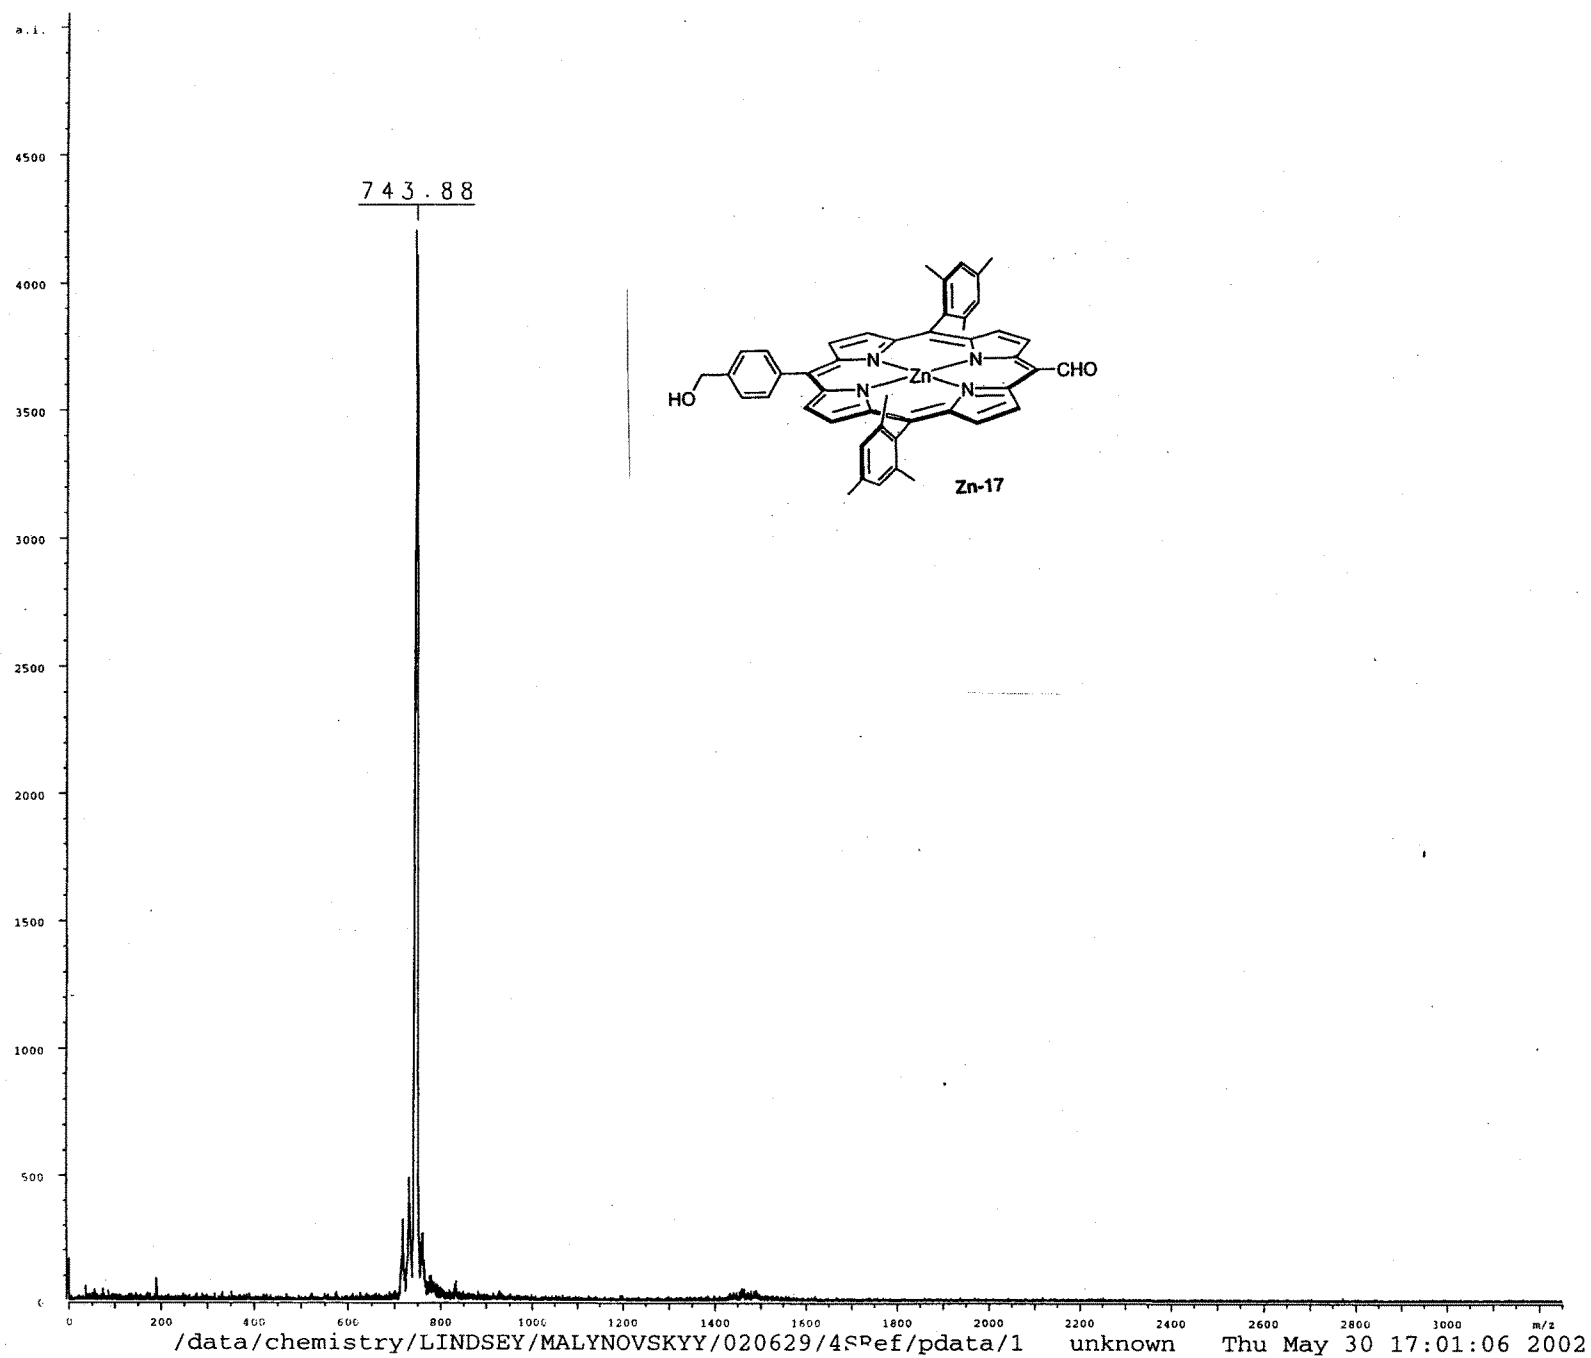

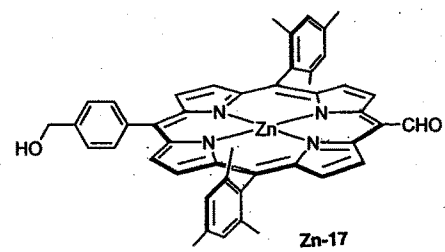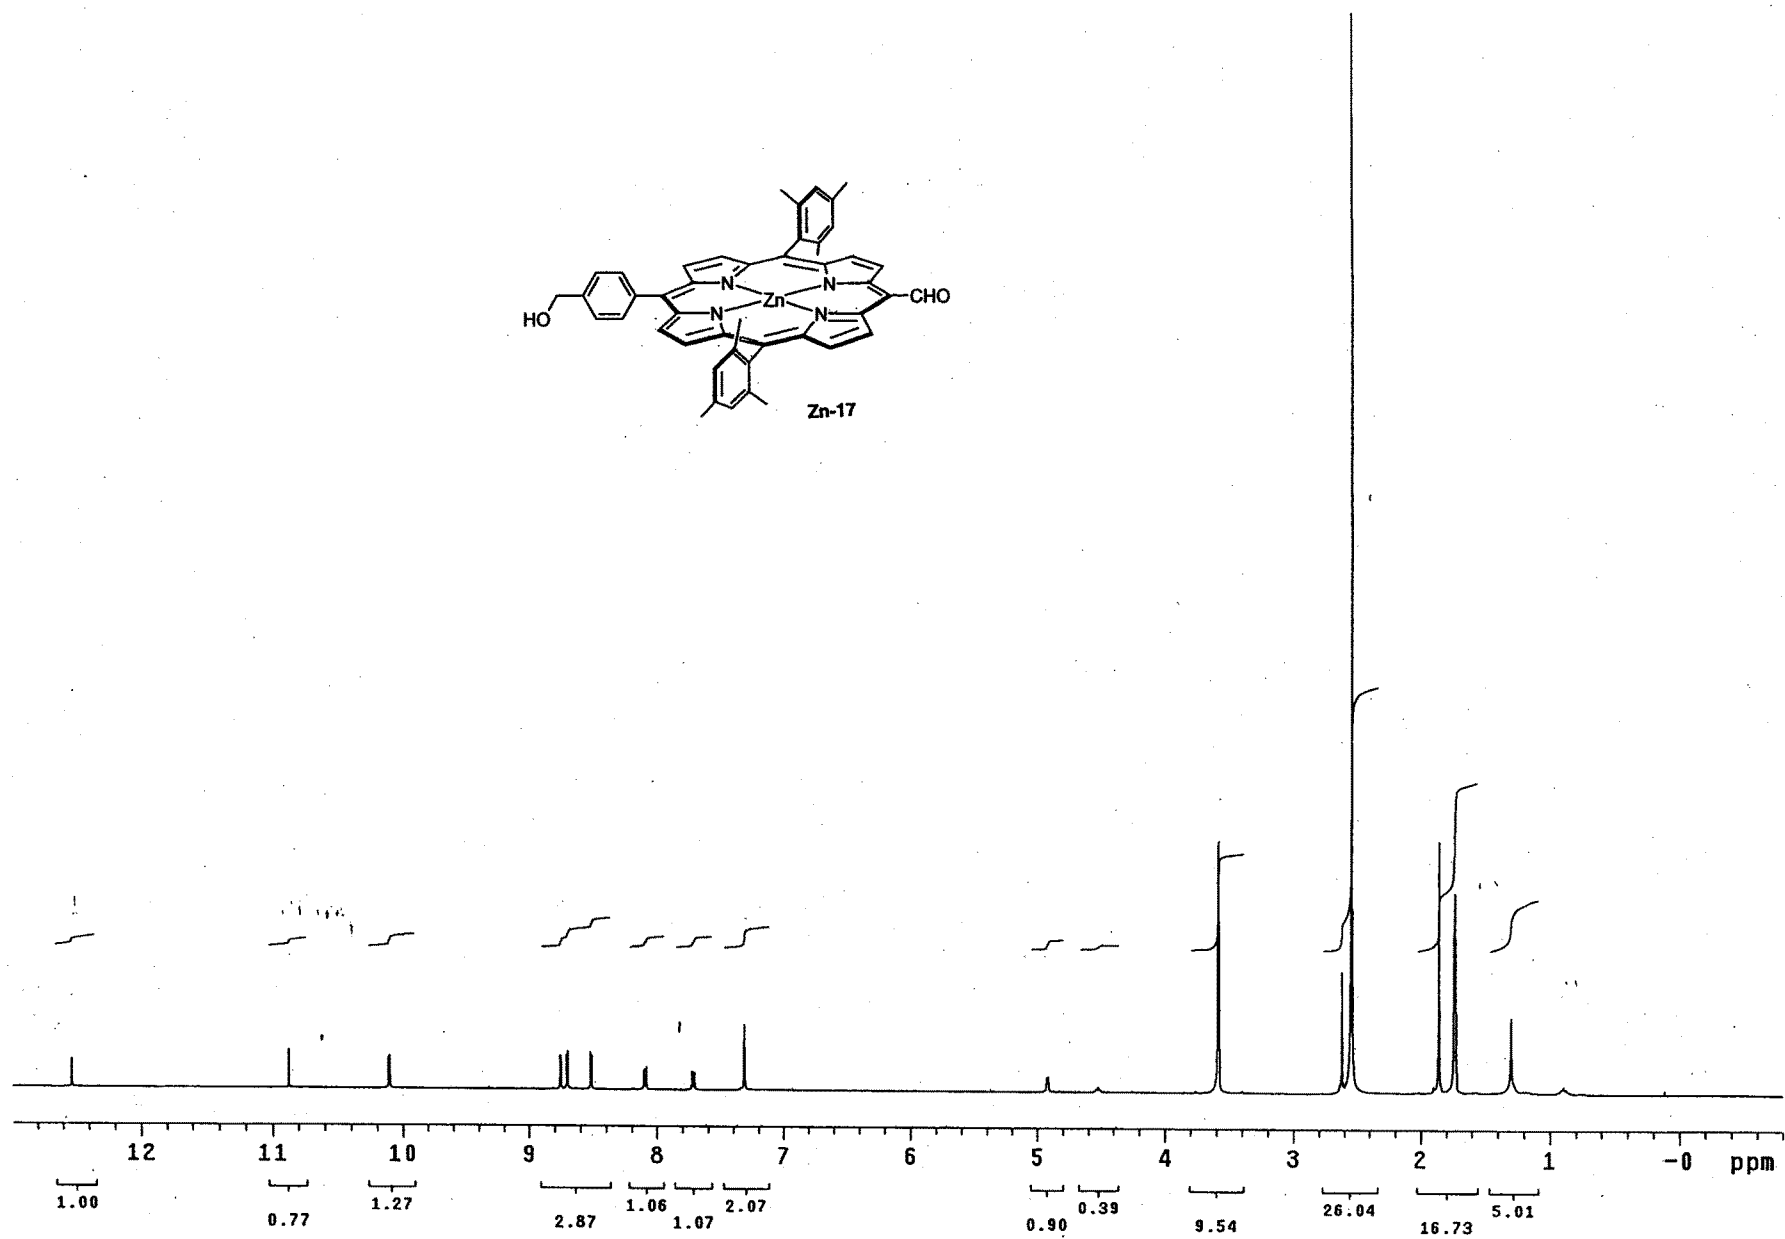

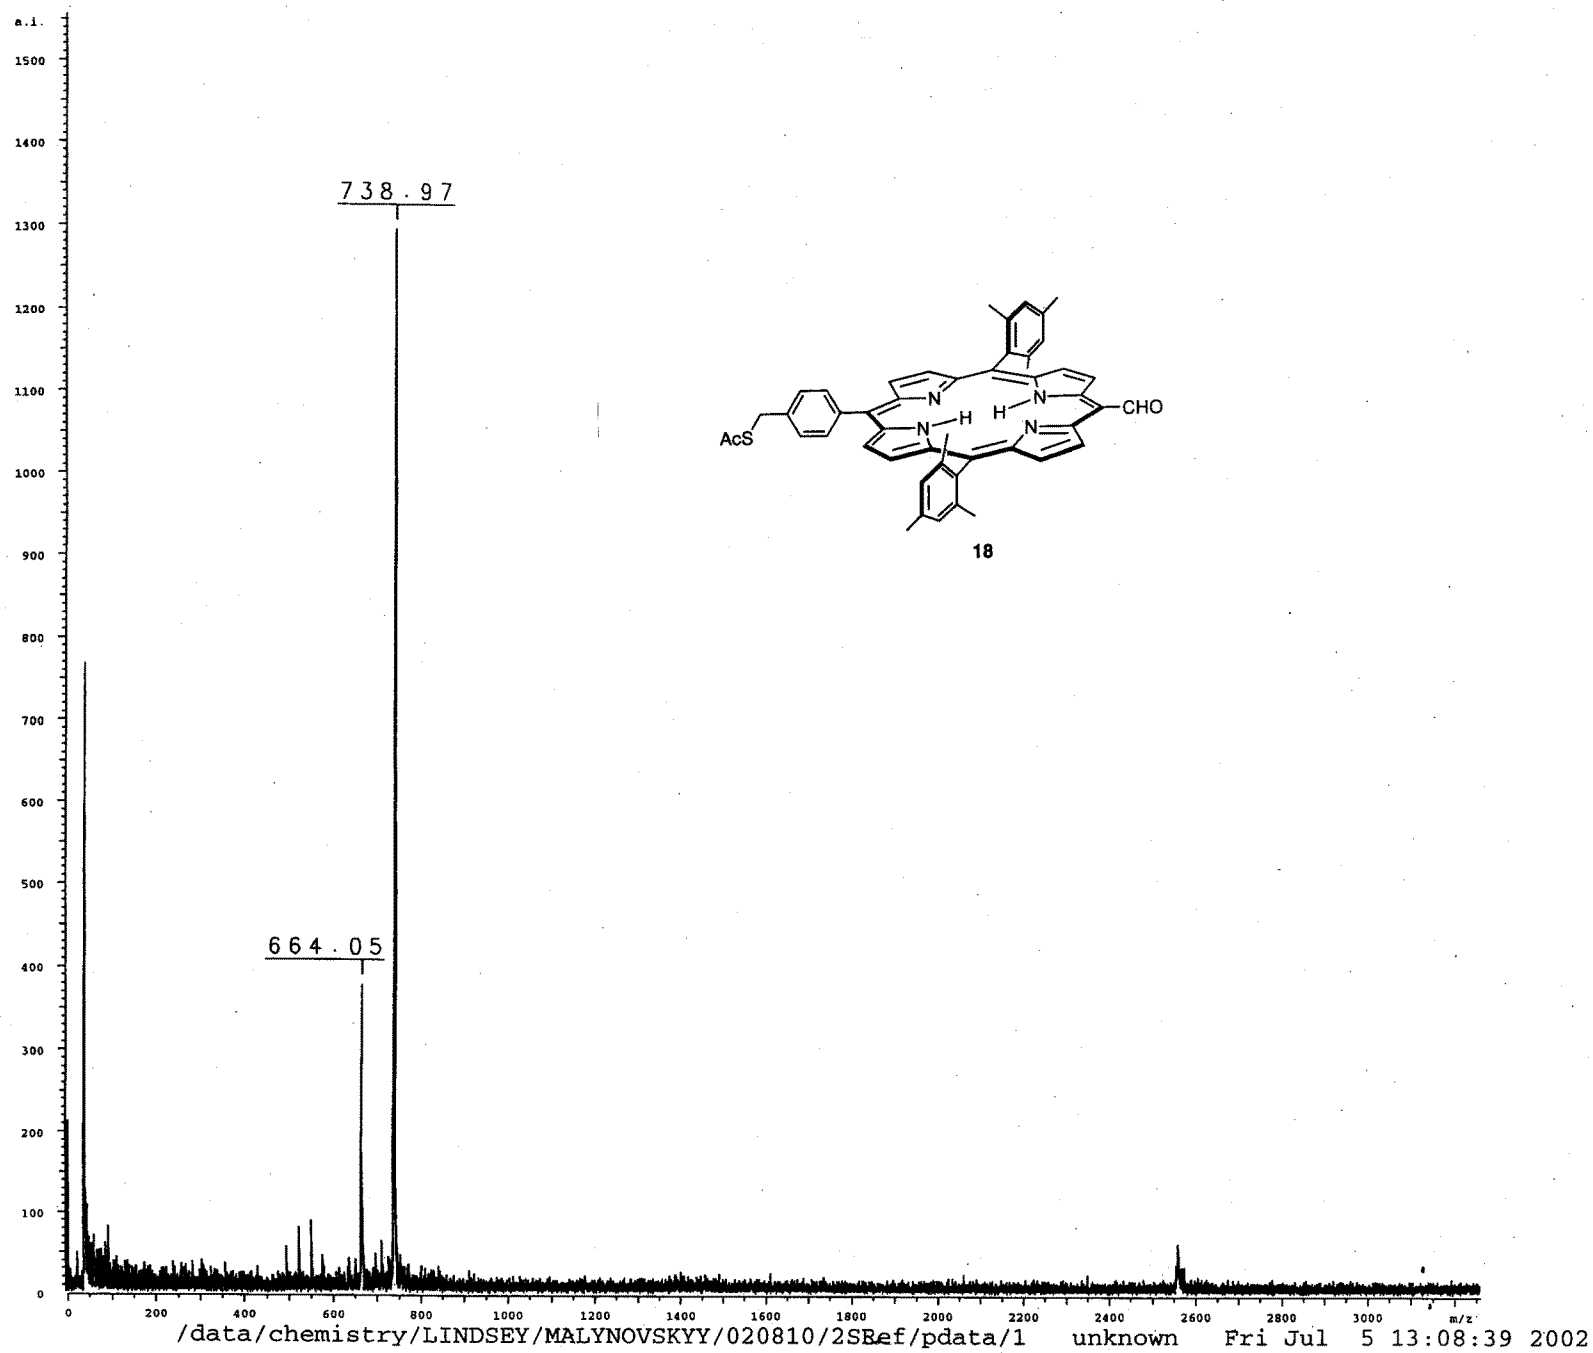

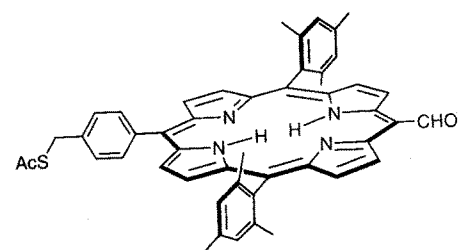

18

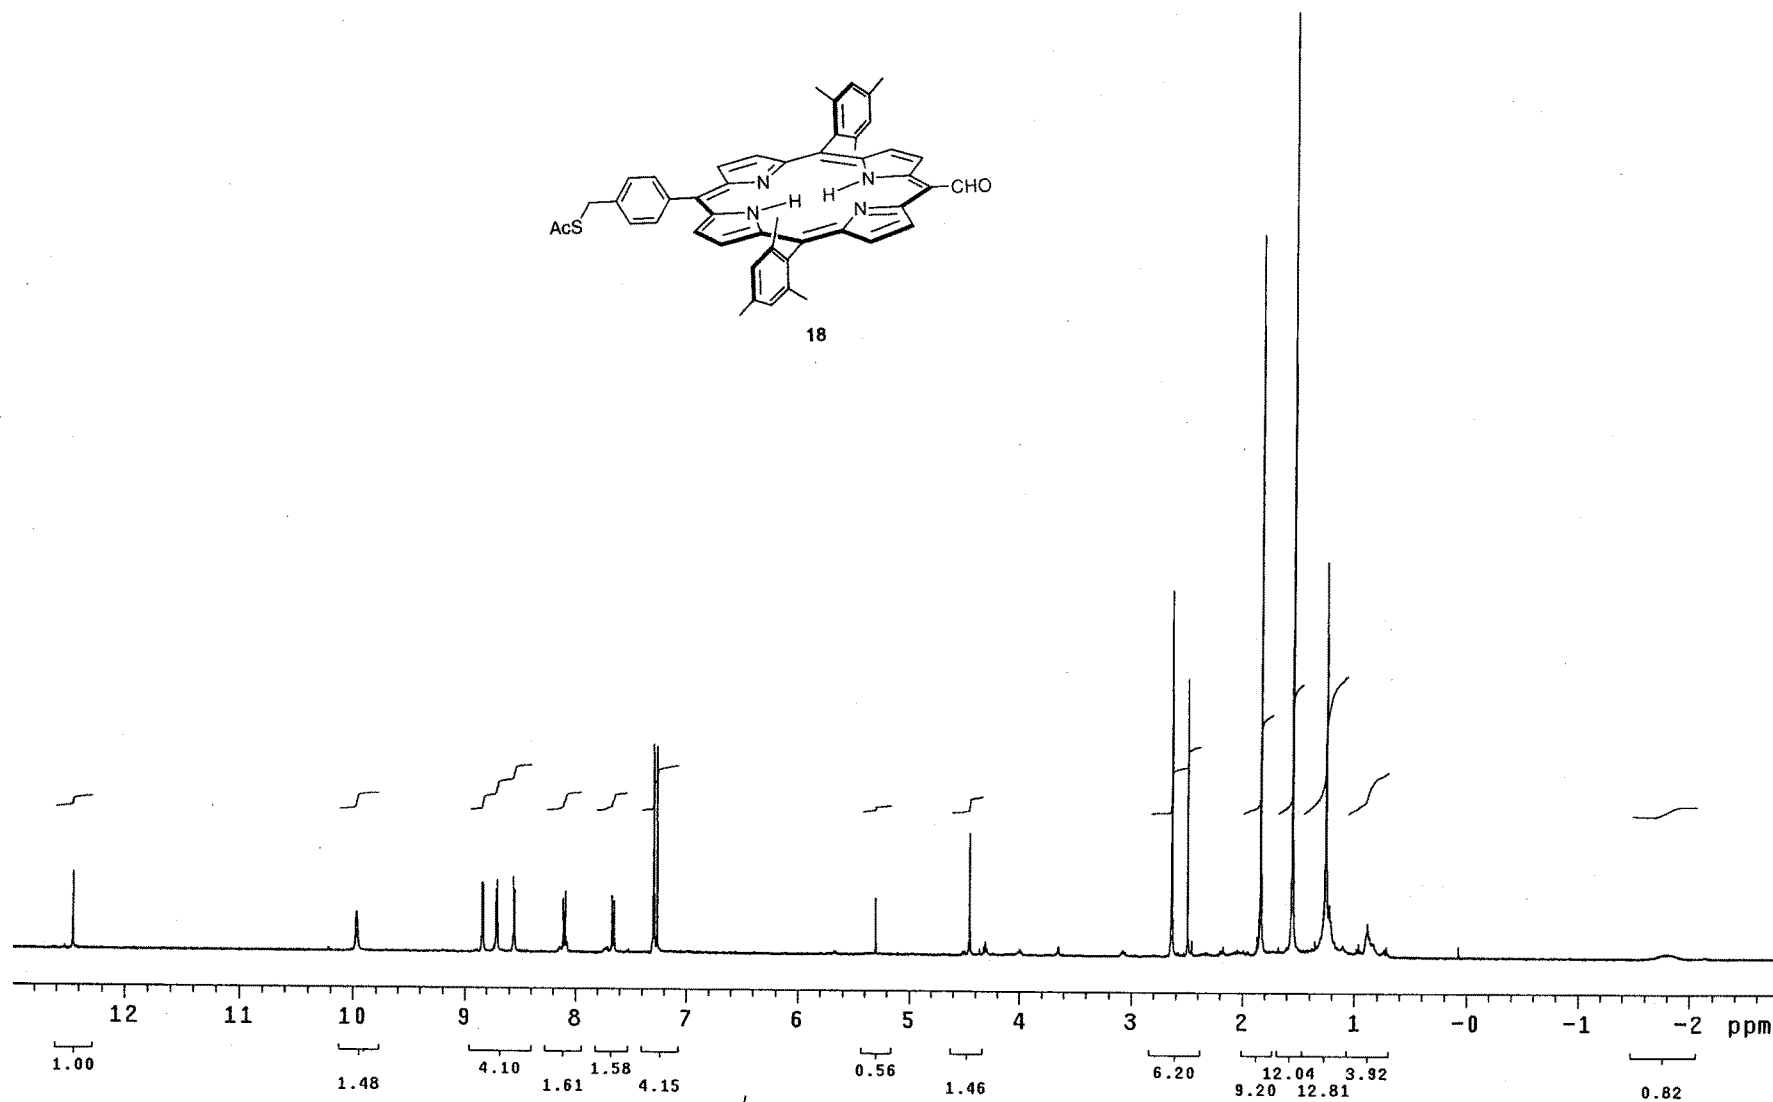

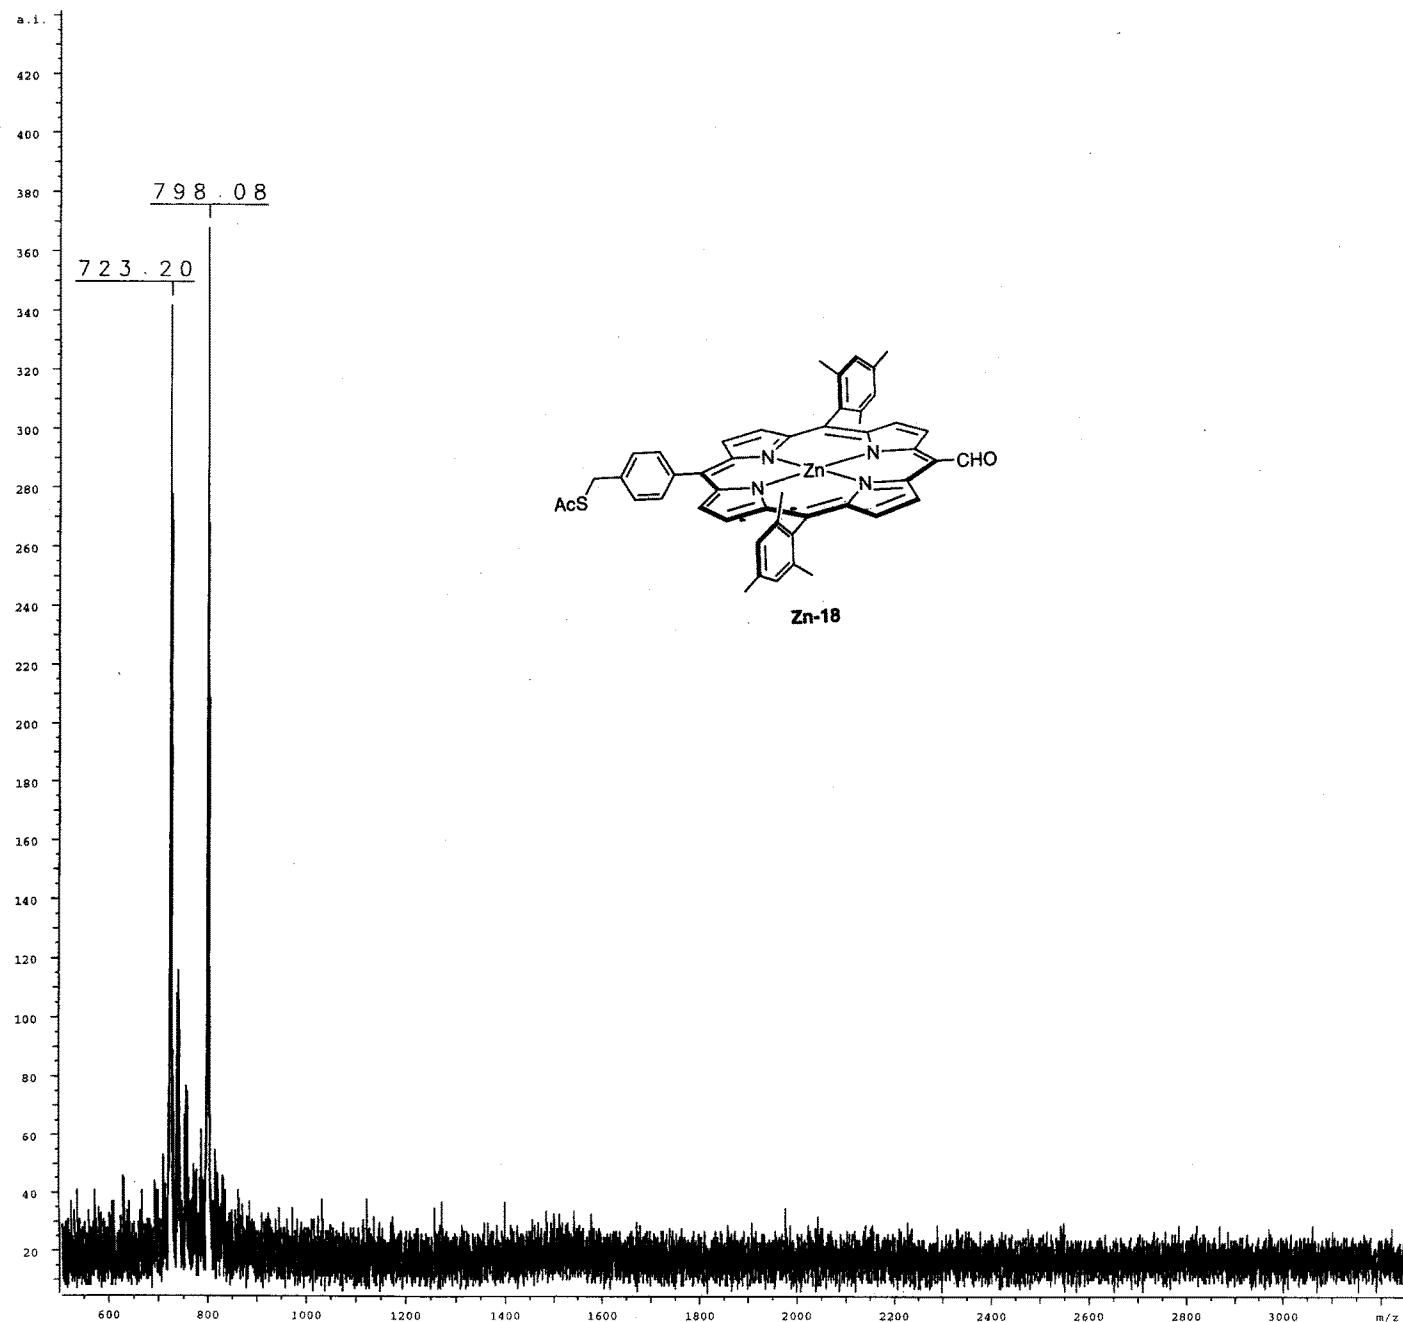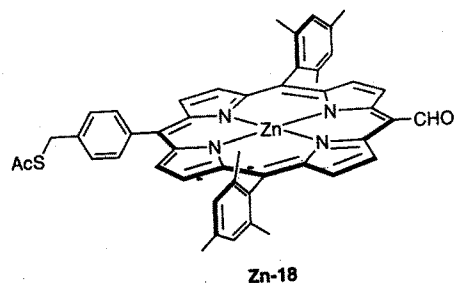

```

INSTRUM TOP
Cpld N. Srinivasan
SMPNAM 020837
AQ_DATE Tue Jul 9 13:47:30 2002
PATH /data/chemistry/LINDSEY/MALYNOVSKYY
POLARI POS
AQOP_m Reflector
TD 40000
NoSHOTS 45
SMONUM 0
SMOPTS1 0
SMOPTS2 0
SMOPTS3 0
DW 1.00 [ns]
DELAY 0 [ns]
Uls1 20.00 [kV]
Uls2 18.70 [kV]
Urefl 0.00 [kV]
Ulenz 7.50 [kV]
Uhlmass 10.00 [kV]
RefFull 0.00 [kV]
UdetL 1.50 [kV]
UdetR 0.00 [kV]
Udefl 2.00 [kV]
REPHZ 1.00 [Hz]
ATTEN 28.0
ML1 2067125.193
ML2 333.982
ML3 0.000
HITURBO no
GDEON yes
GDEOLY short
DEFLON no
RLNSND no
LLNSND no
UIS2ND no
DPCAL1 510.84
DPMAS 700.00 [Da]
RENDVAL 0.33
LENDVAL 0.28
IS2ENDV 0.91
CMT1 zn insertion
CMT2

```

/data/chemistry/LINDSEY/MALYNOVSKYY/020837/2CRef/pdata/1 tof Tue Jul 9 13:47:57 2002

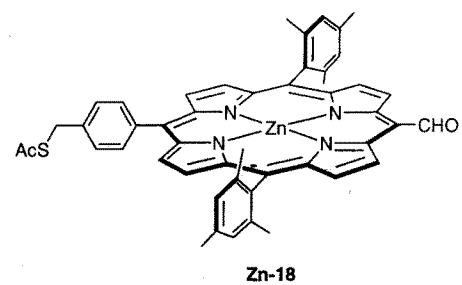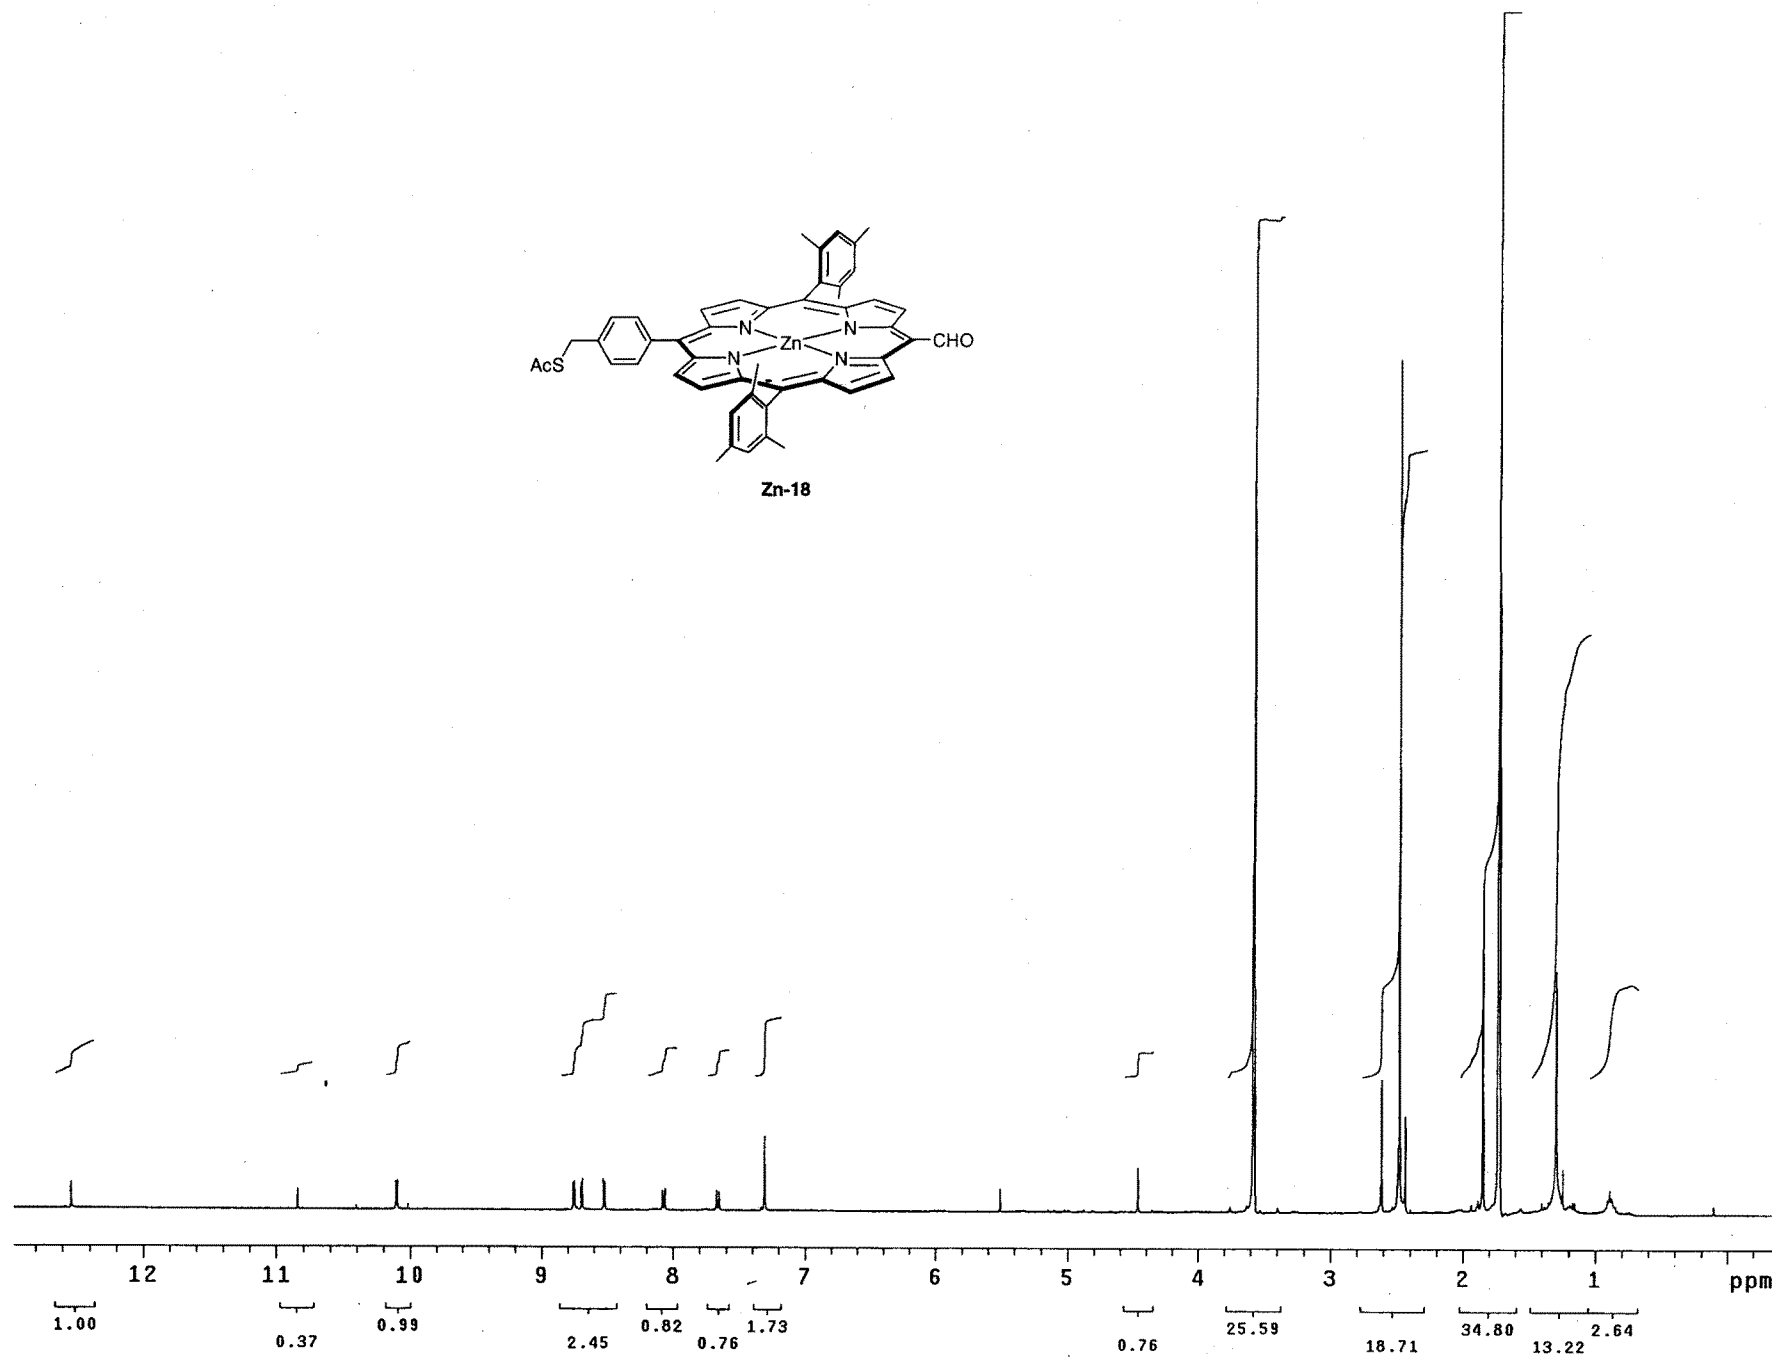

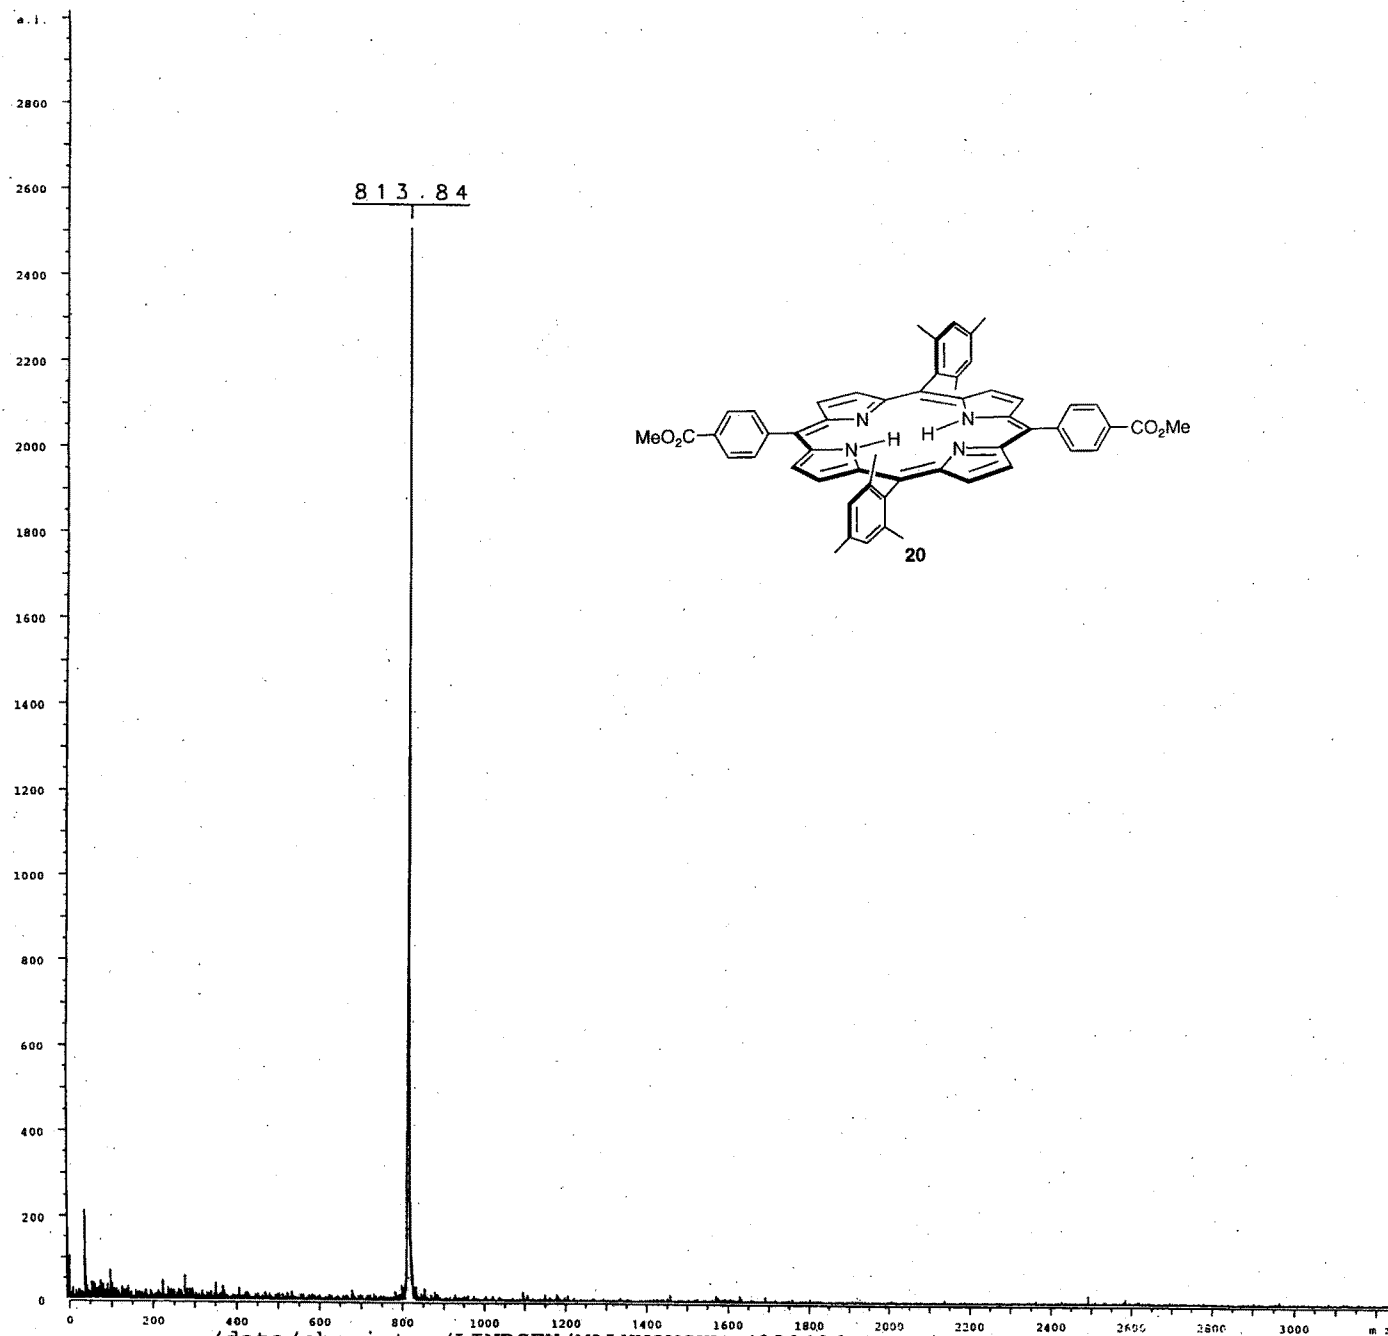

```

INSTRUM TOP
OpId      N. Srinivasan
SMPNAM    020426
AQ_DATE   Thu Apr 11 16:24:04 2002
PATH      /data/chemistry/LINDSEY/MALYNOSKY
POLARI    FOS
AQOP_m    Reflector
TD        40000
NoSHOTS   16
SMONUM    0
SMOPTS1   0
SMOPTS2   0
SMOPTS3   0
DW         1.00 [ns]
DELAY     0 [ns]
U1a1      20.00 [kV]
U1a2      18.70 [kV]
Uref1     0.00 [kV]
U1a3      7.50 [kV]
U1a4      10.00 [kV]
RefPull   0.00 [kV]
UdetL     1.50 [kV]
UdetR     0.00 [kV]
Udef1     2.00 [kV]
REPHZ     1.00 [Hz]
ATTEN     31.0
ML1       2069529.231
ML2       333.982
ML3       0.000
HITURBO   no
GDEON     yes
CODELY    short
DEFLON    no
RLNSEND   no
LINSEND   no
UISZEND   no
OPCAL1    510.84
DPHASS    700.00 [Da]
RBNDVAL   0.33
LBNDVAL   0.28
ISZBNDV   0.91
CMT1      por diester dimesityl
CMT2      attn = 31, shot = 16

```

/data/chemistry/LINDSEY/MALYNOSKY/020426/'Sref/pdata/1 tof Thu Apr 11 16:24:25 2002



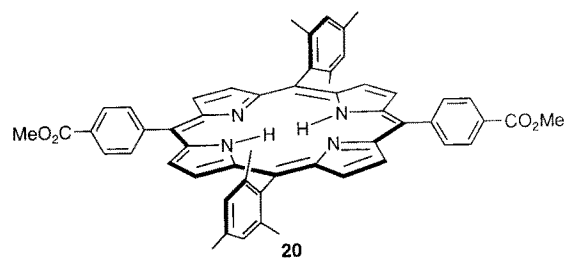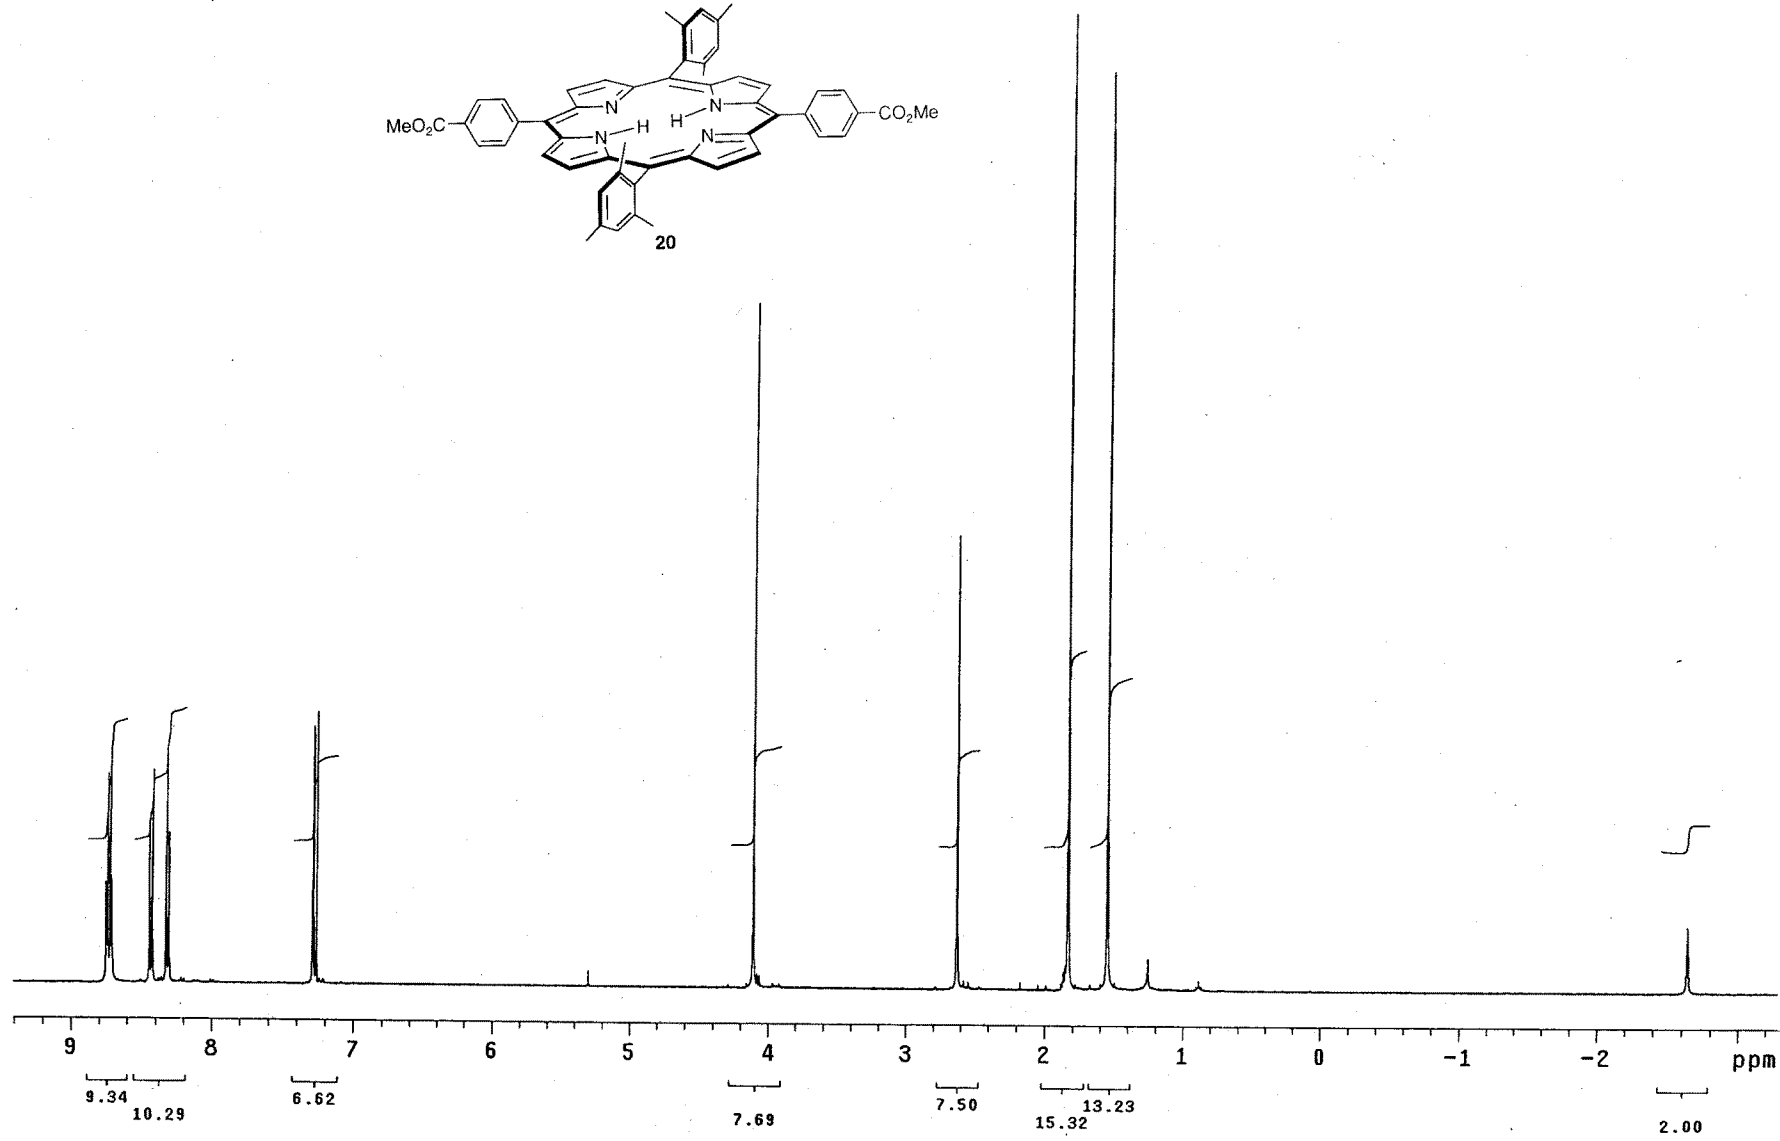

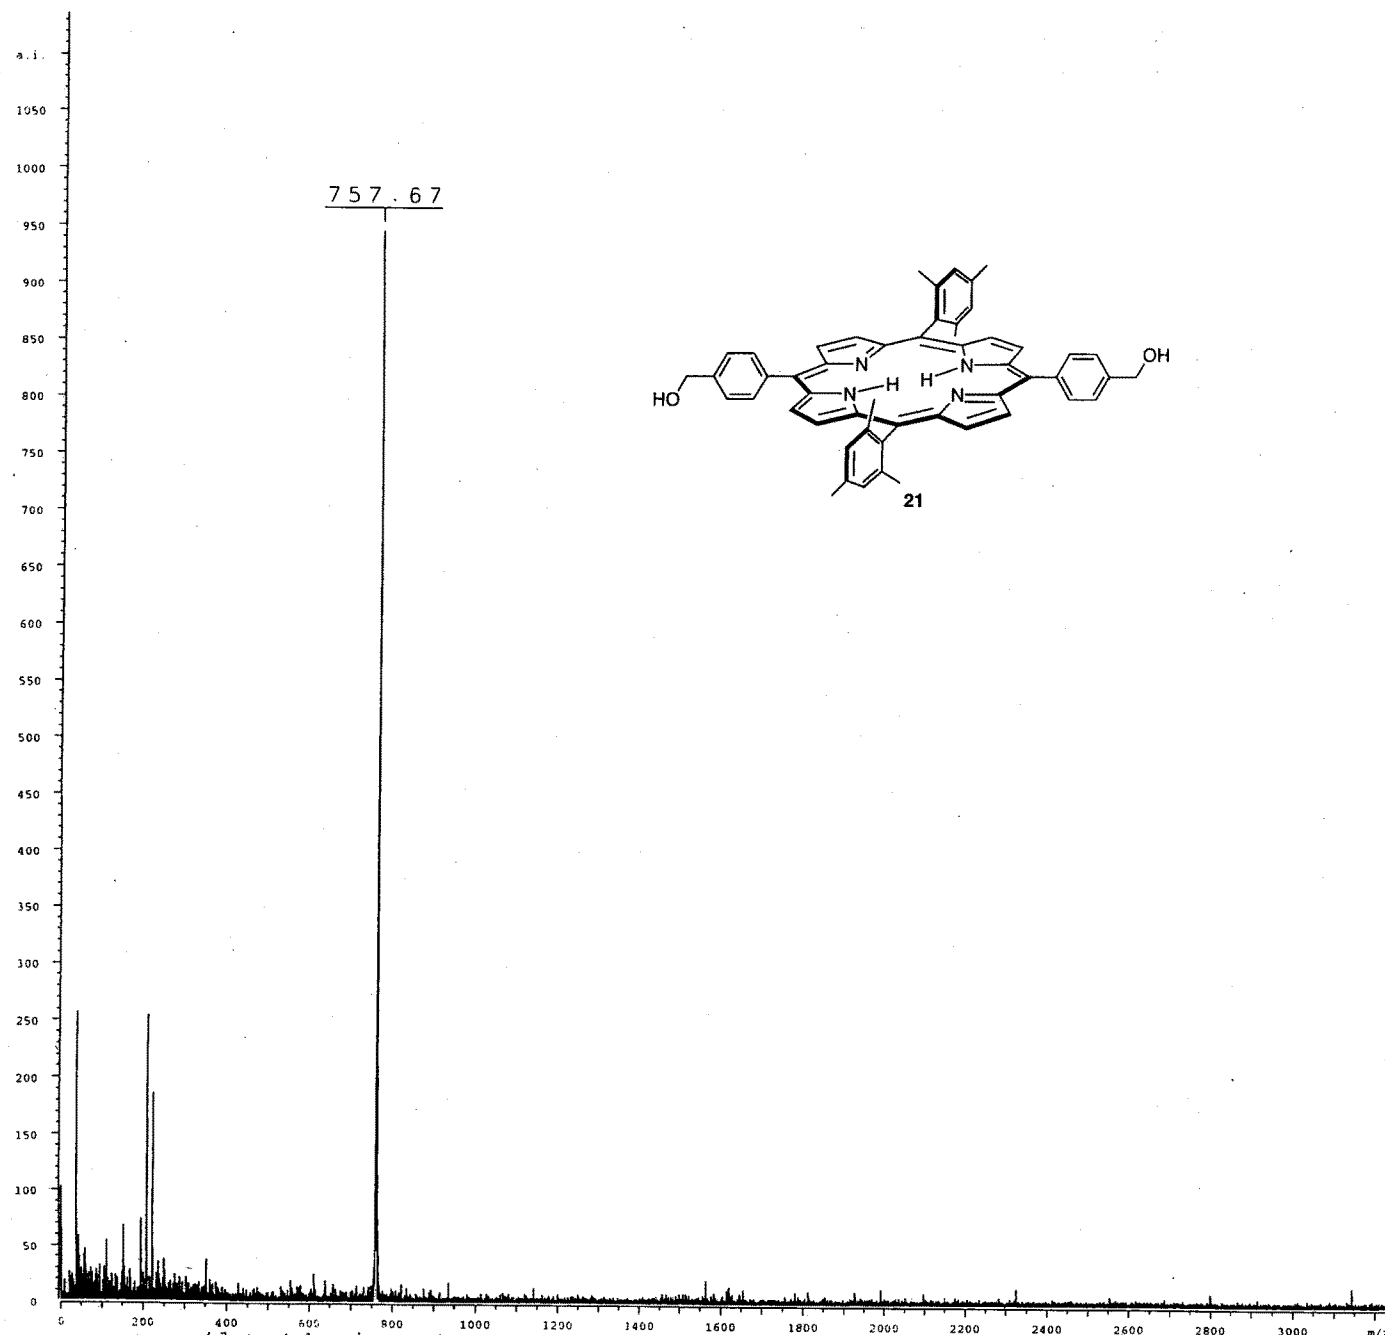

```

INSTRUM TOF
OpId N. Srinivasan
SMPNAM 020433
AQ_DATE Fri Apr 12 15:36:00 2002
PATH /data/chemistry/LINDSEY/MALYNOVSKYY
POLARI POS
AQOP_m Reflector
TD 40000
NoSHOTS 14
SNOUUM 0
SMOPTS1 0
SMOPTS2 0
SMOPTS3 0
DW 1.00 [ns]
DELAY 0 [ns]
Uis1 20.00 [kV]
Uis2 18.70 [kV]
Uref1 0.00 [kV]
Uilens 7.50 [kV]
Uhimass 10.00 [kV]
RefFull1 0.00 [kV]
UdetL 1.50 [kV]
UdetR 0.00 [kV]
Udef1 2.00 [kV]
REPHZ 1.00 [Hz]
ATTEN 32.0
ML1 2069529.231
ML2 333.982
ML3 0.000
HITURBO no
GDEON yes
GDEDLY short
DEFLON no
RLNSBND no
LLNSBND no
UIS2BND no
DPCAL1 510.84
DPMAS 700.00 [Da]
RBNDVAL 0.33
LBNDVAL 0.28
IS2BNDV 0.91
CMT1 por diol dimesityl
CMT2 shots = 14, attn = 32

```

/data/chemistry/LINDSEY/MALYNOVSKYY/020433/1SRef/pdata/1 tof Fri Apr 12 15:36:23 2002

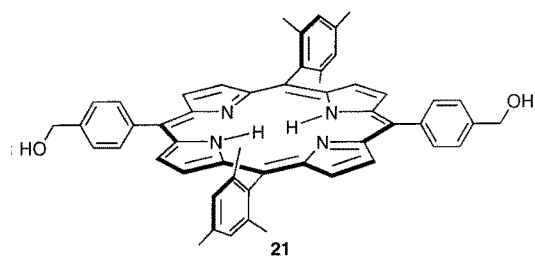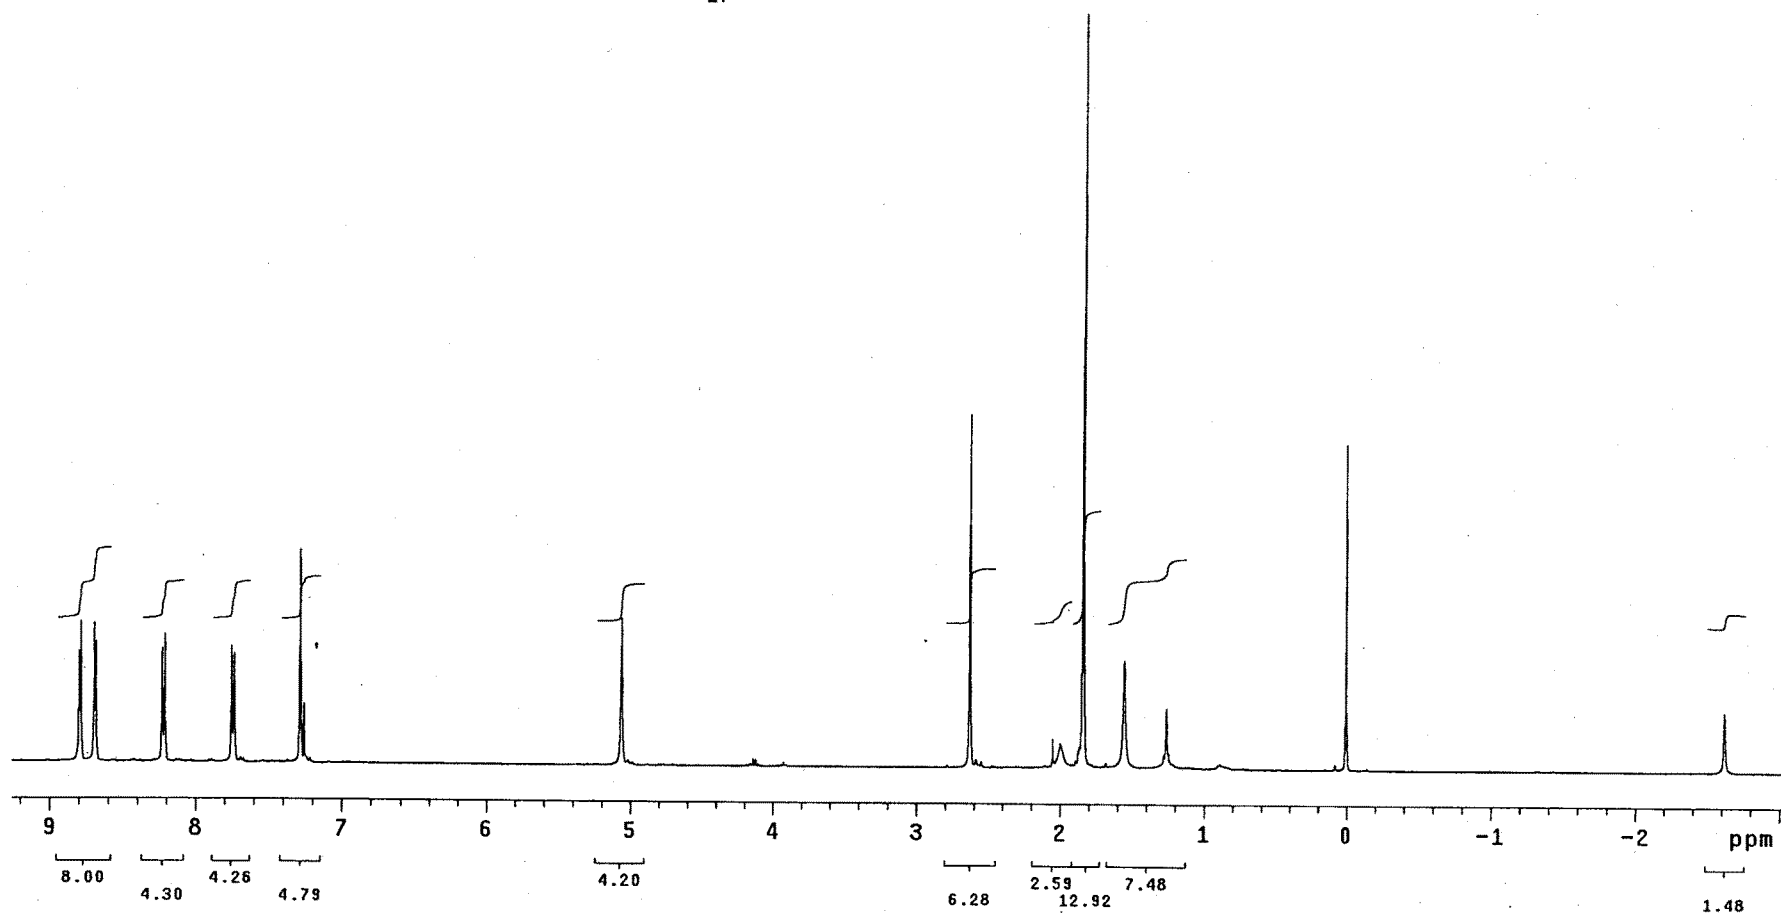

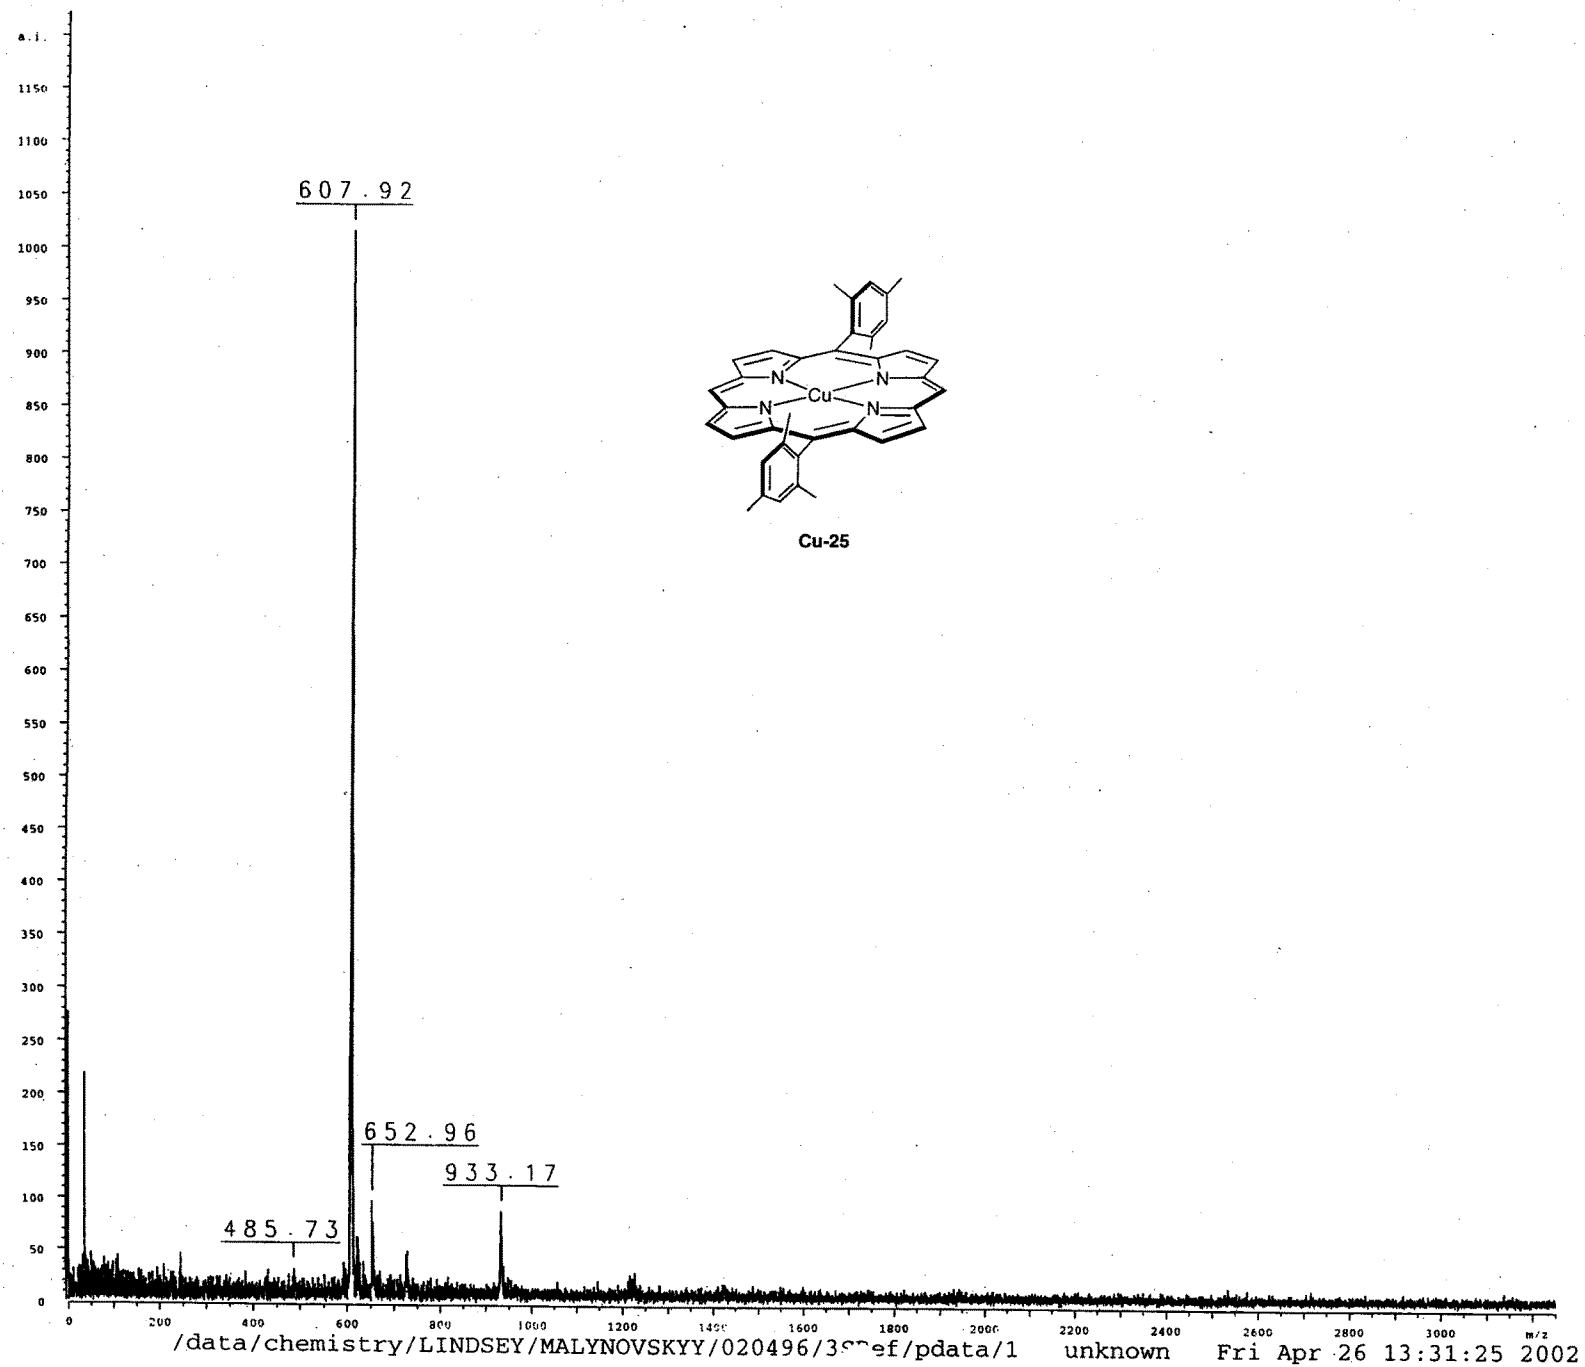

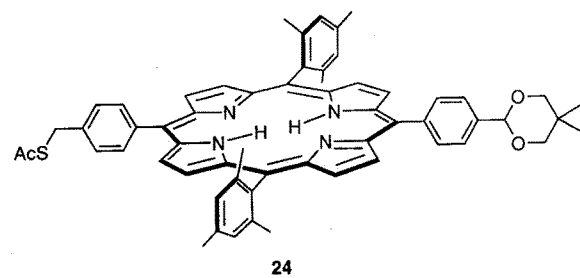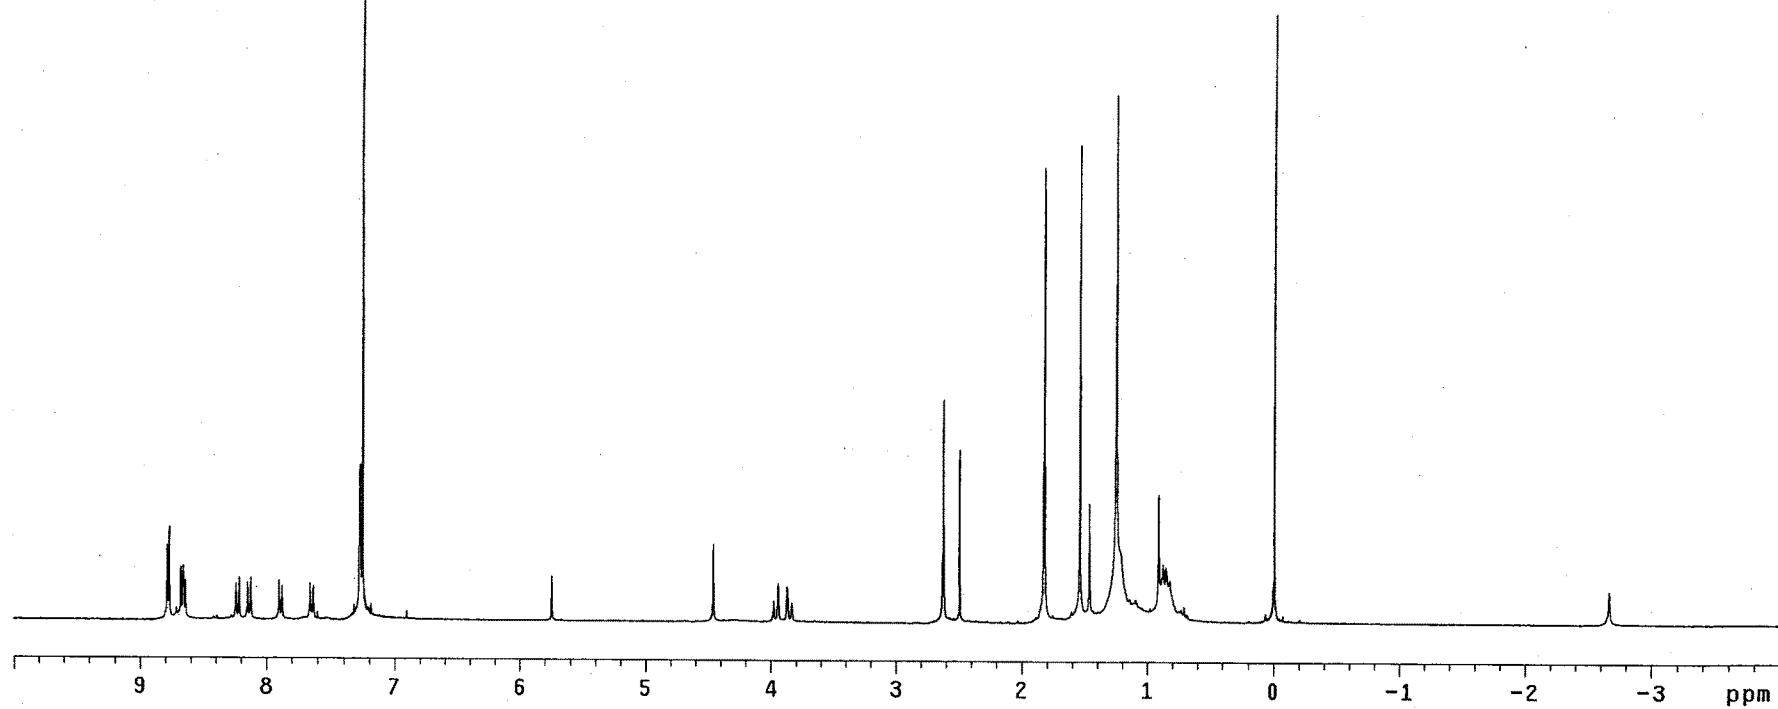

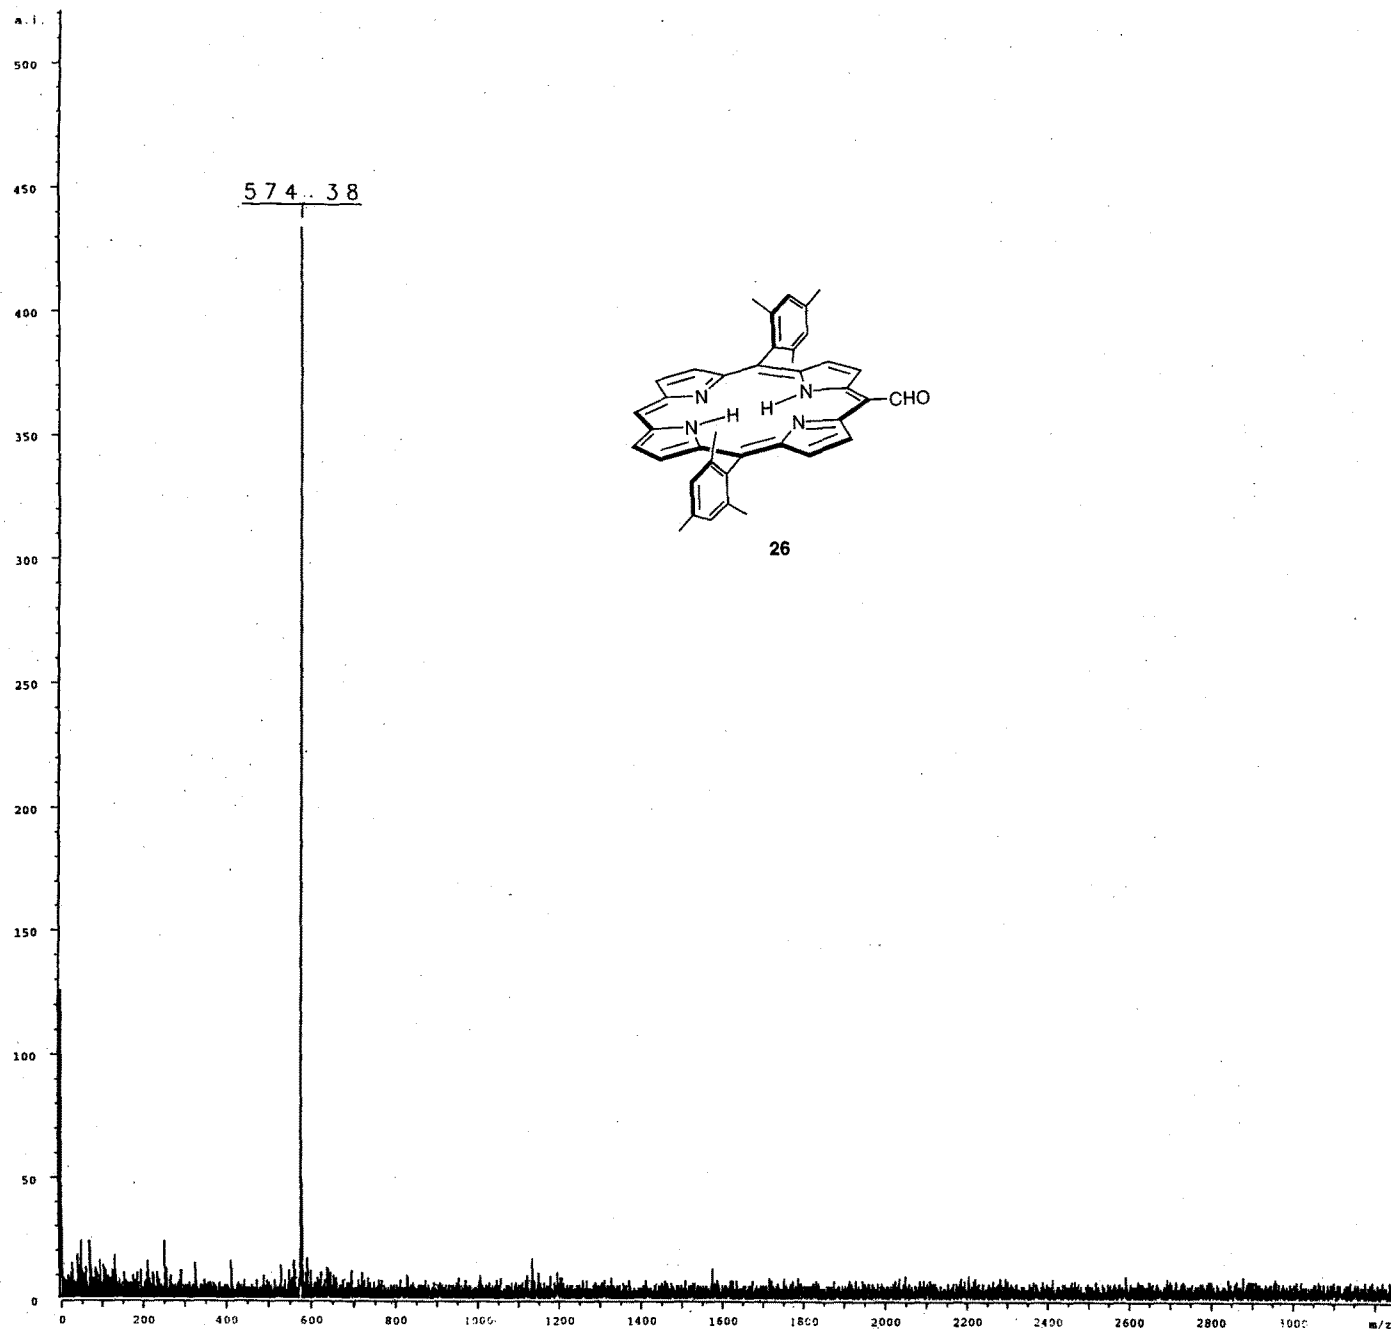

```

INSTRUM TOP
OpId      N. Srinivasan
SMPNAM    020524
AQ_DATE   Fri May 3 15:18:45 2002
PATH      /data/chemistry/LINDSEY/MALYNOVSKYY
POLARI    POS
AQOP_m    Reflector
TD         40000
NoSHOTS   16
SNOPTM    0
SNOPTS1   0
SNOPTS2   0
SNOPTS3   0
DM         1.00 [ns]
DELAY     0 [ns]
Uis1      20.00 [kV]
Uis2      18.70 [kV]
Uref1     0.00 [kV]
Ulen5     7.50 [kV]
Uhlmas5   10.00 [kV]
RefFull   0.00 [kV]
UdetL     1.50 [kV]
UdetR     0.00 [kV]
Udef1     2.00 [kV]
REPHZ     1.00 [Hz]
ATTEN     32.0
ML1        2071938.026
ML2        333.982
ML3         0.000
HITURBO   no
GDECON    yes
GDEELY    short
DEFLON    no
RLASBND   no
LLASBND   no
UIS2BND   no
DPCAL1    510.84
DPMAS5    700.00 [Da]
RENDVAL   0.33
LENDVAL   0.28
IS2BNDV   0.91
CMT1      formulation after column
CMT2      shot., 16; att., 32

```

/data/chemistry/LINDSEY/MALYNOVSKYY/020524/^SRef/pdata/1 tof Fri May 3 15:19:17 2002

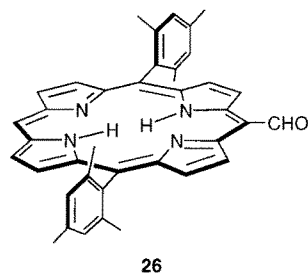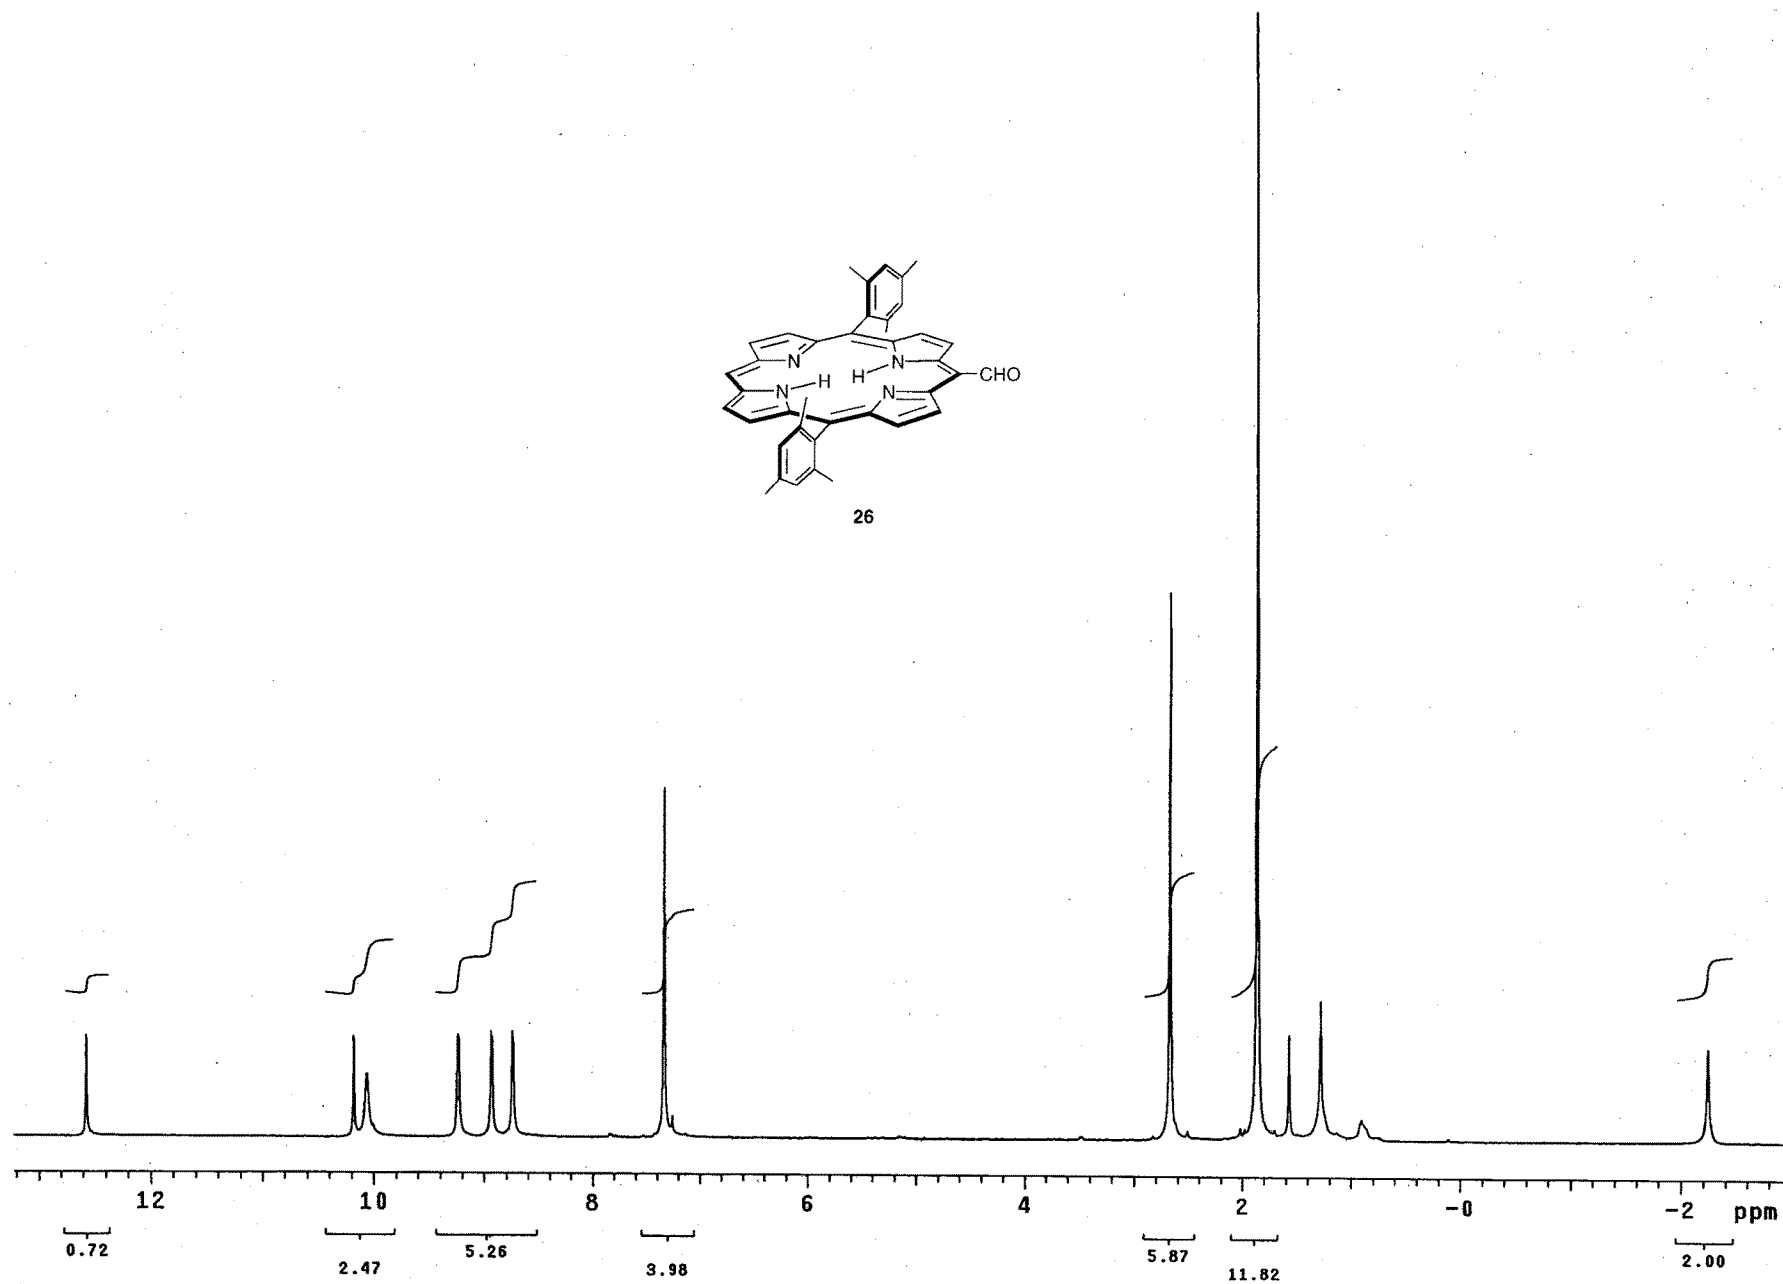

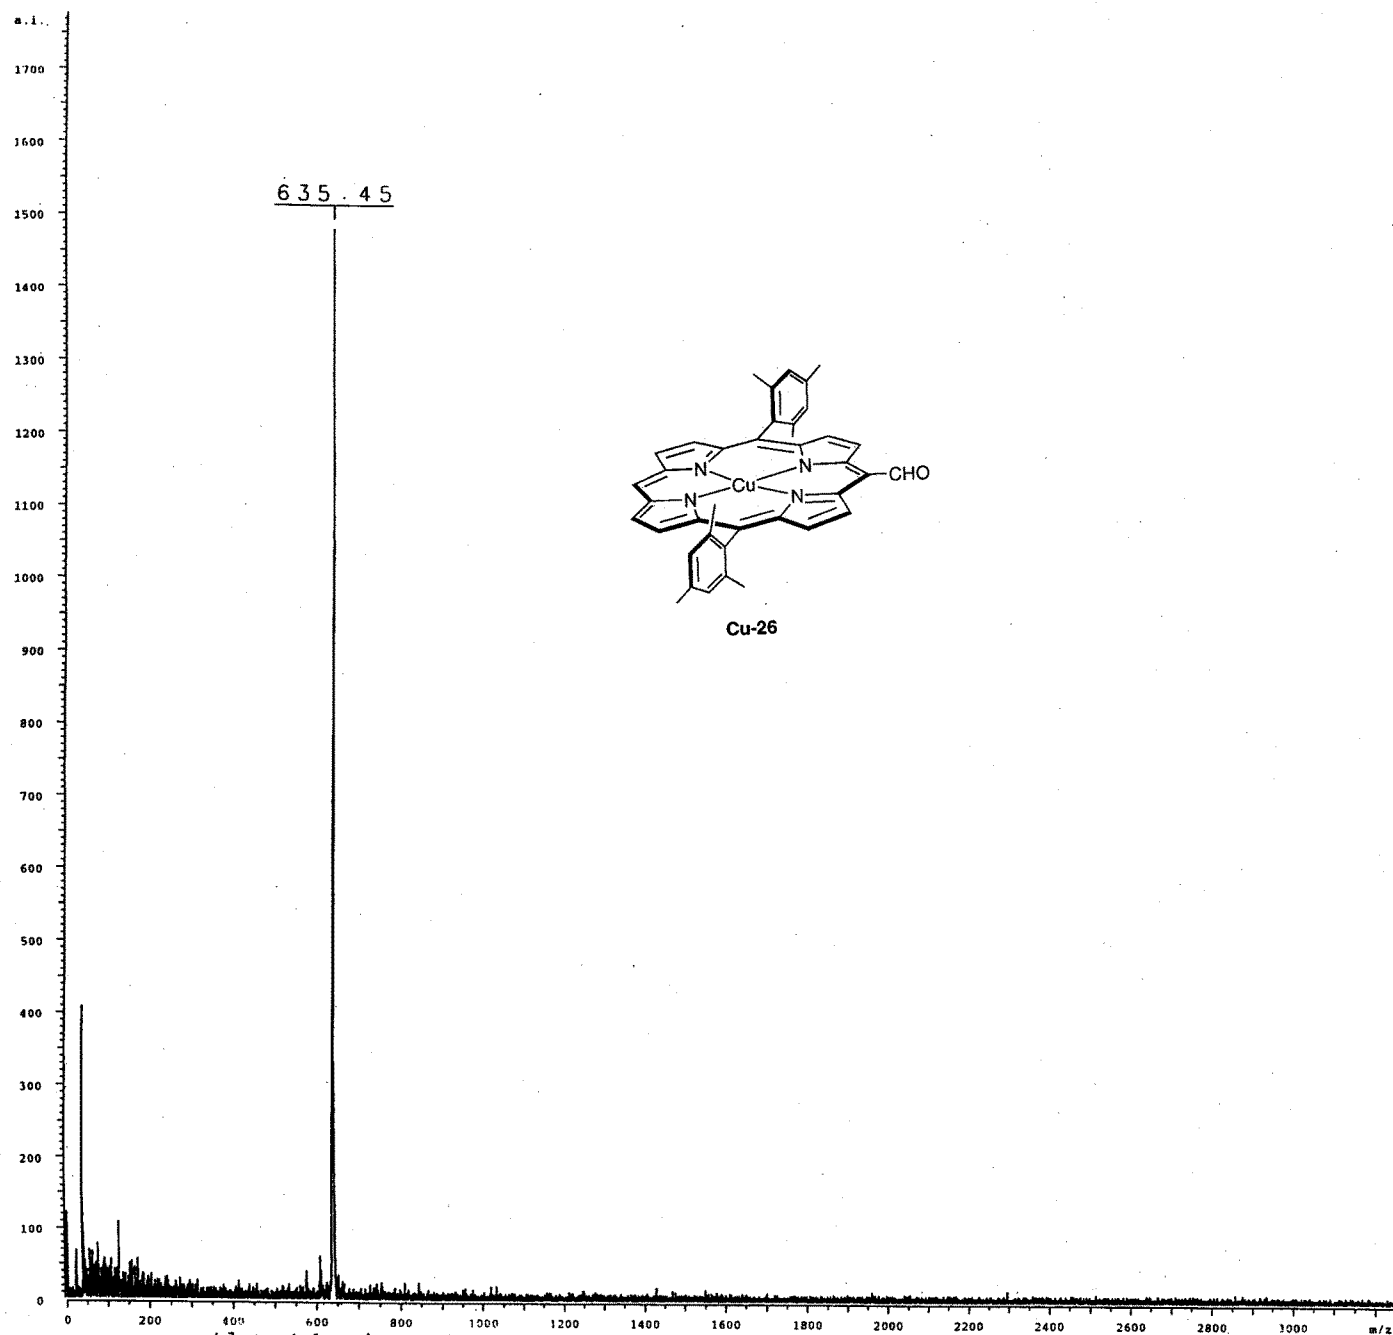

```

INSTRUM TOP
OpId N. Srinivasan
SMPNAM 020511
Acq_DATE Tue Apr 30 15:14:38 2002
PATH /data/chemistry/LINDSEY/MALYNOVSKYY
POLARI POS
AQOP_m Reflector
TO 40000
NoSHOTS 16
SNOPT1 0
SNOPT2 0
SNOPT3 0
DW 1.00 [ns]
DELAY 0 [ns]
Uis1 20.00 [kV]
Uis2 18.70 [kV]
Uref1 0.00 [kV]
Uisns 7.50 [kV]
Uisns 10.00 [kV]
RefFull 0.00 [kV]
UdetL 1.50 [kV]
UdetR 0.00 [kV]
Udef1 2.00 [kV]
REPHZ 1.00 [Hz]
ATTEN 31.0
ML1 2071938.026
ML2 333.982
ML3 0.000
HITURBO no
GDEON yes
GDEPLY short
DEFLON no
RLNSND no
LLNSND no
UIS2BND no
DPCAL1 510.84
DPMAS 700.00 [Da]
RENDVAL 0.33
LENDVAL 0.28
IS2ENDV 0.51
CMT1 formylation f7 to f14
CMT2 shot., 16; att., 31

```

/data/chemistry/LINDSEY/MALYNOVSKYY/020511/'SRef/pdata/1 tof Tue Apr 30 15:15:15 2002



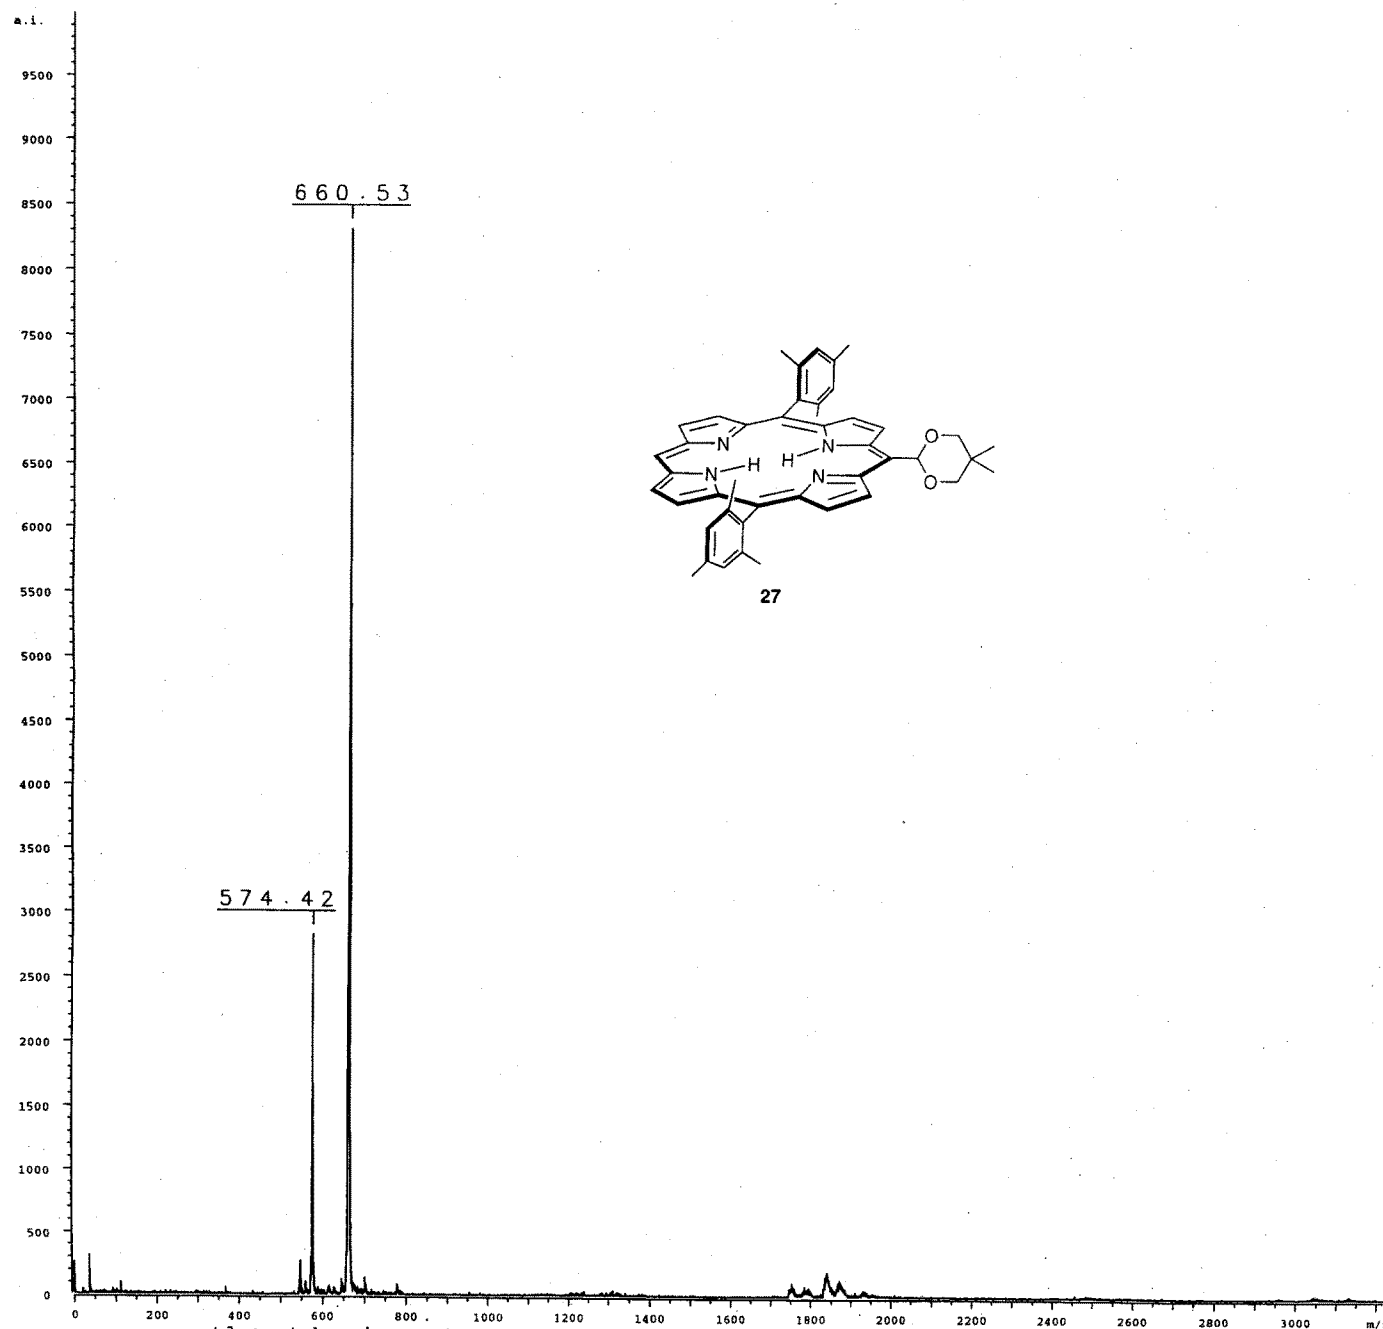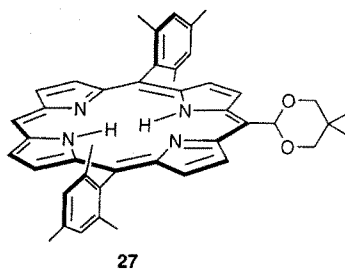

```

INSTRUM TOF
OpId N. Srinivasan
SMPNAM 020556
AQ DATE Tue May 14 13:24:17 2002
PATH /data/chemistry/LINDSEY/MALYNOVSKYY
POLARI POS
AQOP_m Reflector
TD 40000
NoSHOTS 49
SMONUM 0
SMOPTS1 0
SMOPTS2 0
SMOPTS3 0
DW 1.00 [ns]
DELAY 0 [ns]
Uis1 20.00 [kV]
Uis2 18.70 [kV]
Uref1 0.00 [kV]
Ulen1 7.50 [kV]
Ulinmass 10.00 [kV]
RefFull 0.00 [kV]
UdetL 1.50 [kV]
UdetR 0.00 [kV]
Udef1 2.00 [kV]
REPHZ 1.00 [Hz]
ATTEN 31.0
ML1 2067125.193
ML2 333.982
ML3 0.000
HITURBO no
GDEON yes
GDEDLV short
DEFLON no
RLS2END no
LINS2END no
UIS2END no
DPCALL 510.84
DPHASS 700.00 [Da]
RENDVAL 0.33
LENDVAL 0.28
IS2ENDV 0.91
CMT1 after 2h30
CMT2

```

/data/chemistry/LINDSEY/MALYNOVSKYY/020556/2SRef/pdata/1 tof Tue May 14 13:24:37 2002

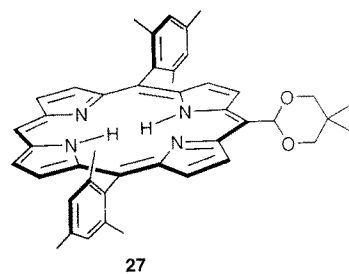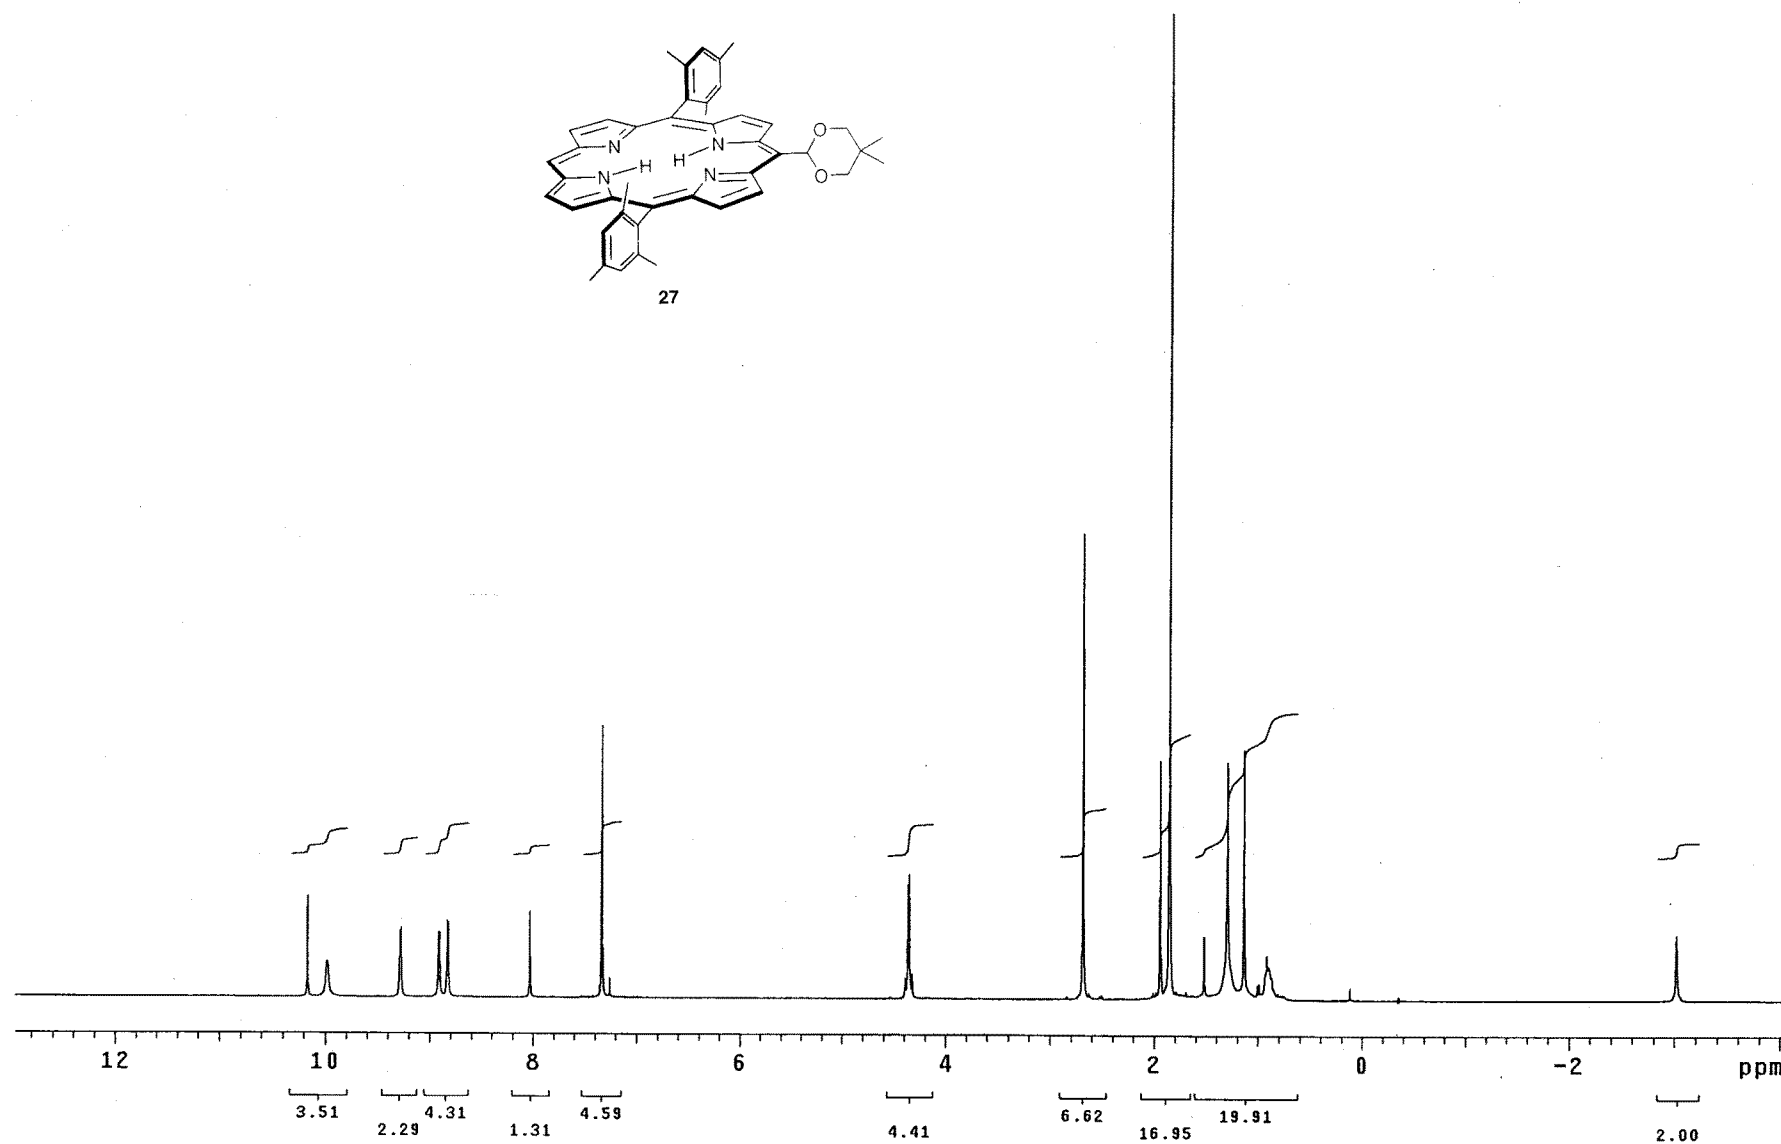

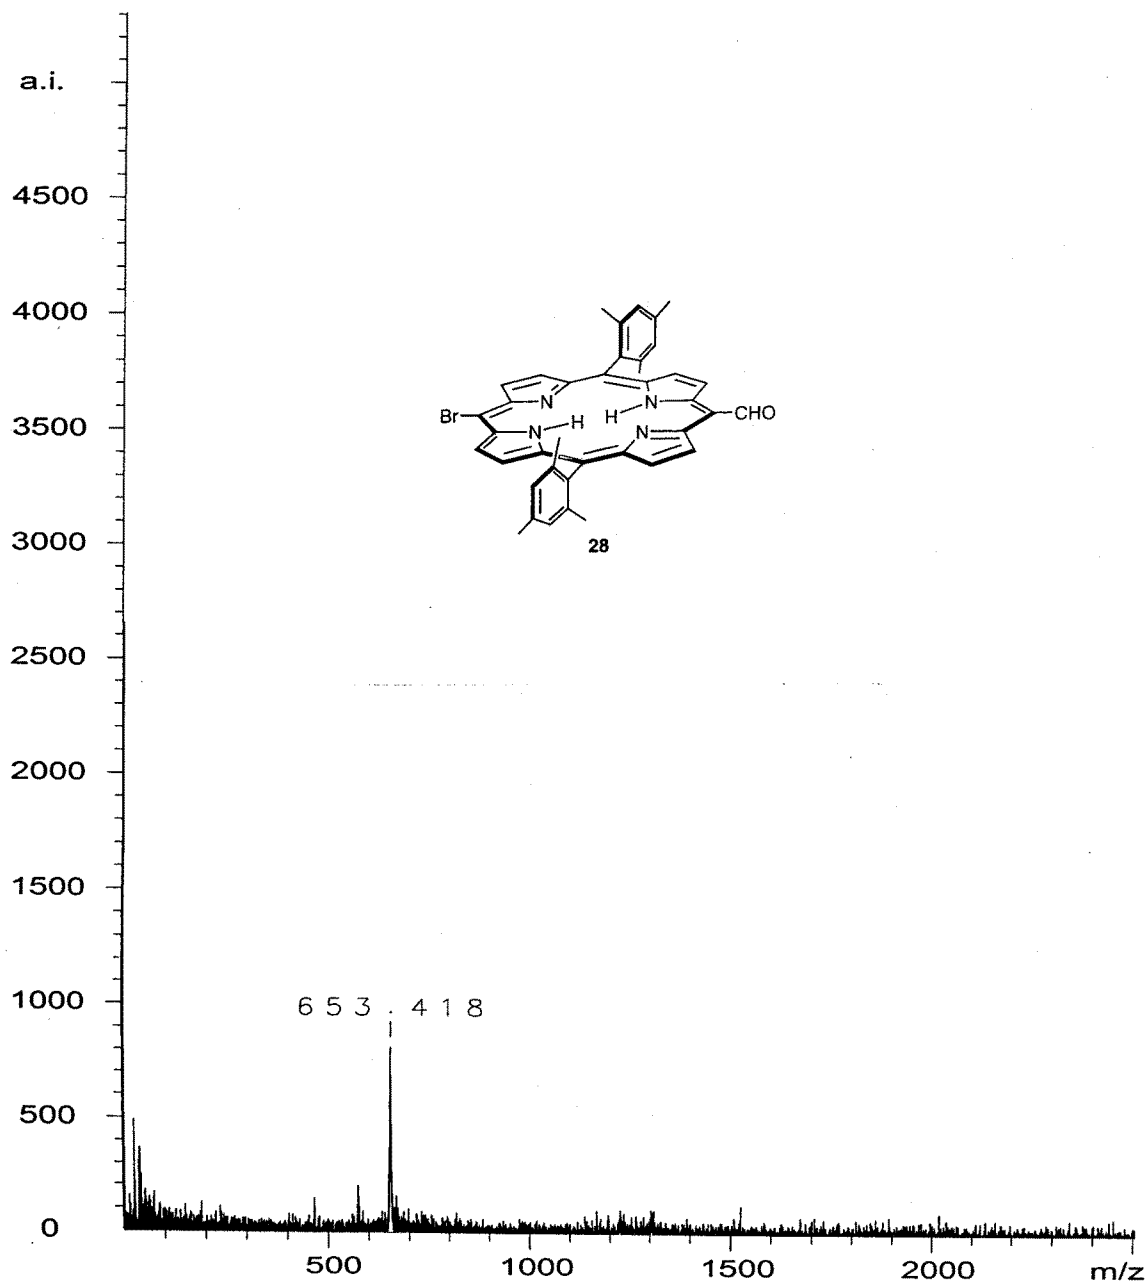

INSTRUM OMNIFLEX  
 OpId tof  
 SMPNAM CC-Br-CHO  
 AQ\_DATE 2004-01-16 09:04:32  
 PATH D:\data\Chemistry\Lindsey\Patchanita  
 POLARI POS  
 AQOP\_m Linear  
 TD 78614  
 NoSHOTS 60  
 SMONUM 0  
 SMOPTS1 0  
 SMOPTS2 0  
 SMOPTS3 0  
 DW 1.00 [ns]  
 DELAY 252 [ns]  
 Uis1 19.00 [kV]  
 Uis2 13.15 [kV]  
 Urefl 20.00 [kV]  
 Ulens 9.40 [kV]  
 Uhimass 0.00 [kV]  
 RefFull 0.00 [kV]  
 UdetL 1.65 [kV]  
 UdetR 1.70 [kV]  
 Udefl 0.00 [kV]  
 REPHZ 3.00 [Hz]  
 ATTEN 41.0  
 ML1 789620.245  
 ML2 252.162  
 ML3 0.000  
 HITURBO no  
 GDEON yes  
 GDEDLY short  
 DEFLON no  
 RLNSBND no  
 LLNSBND no  
 UIS2BND no  
 DPCAL1 0.38  
 DPMASS 500.00 [Da]  
 RBNDVAL 0.00  
 LBNDVAL 0.00  
 IS2BNDV 0.00  
 CMT1 FLEXControl generated XMASS data  
 CMT2 (c) 2000 Bruker Daltonics

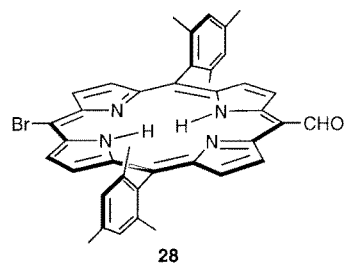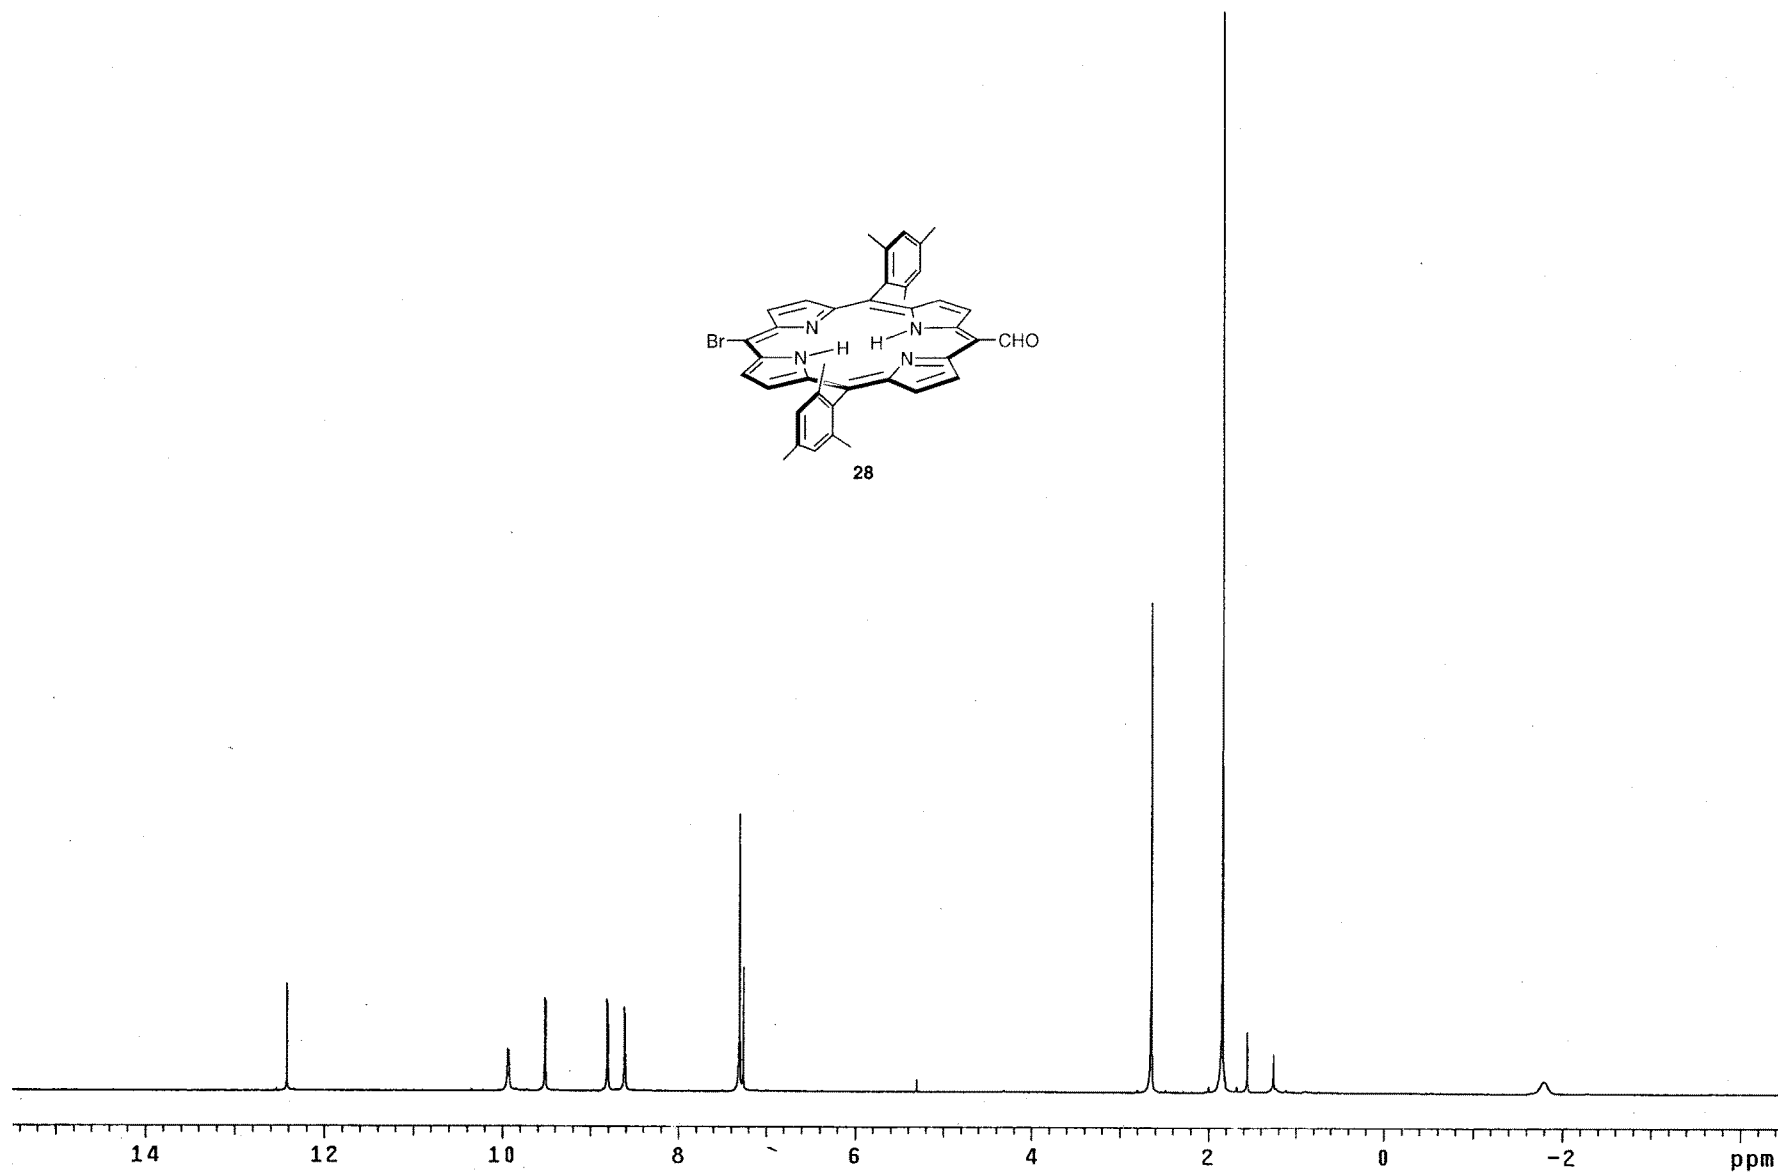

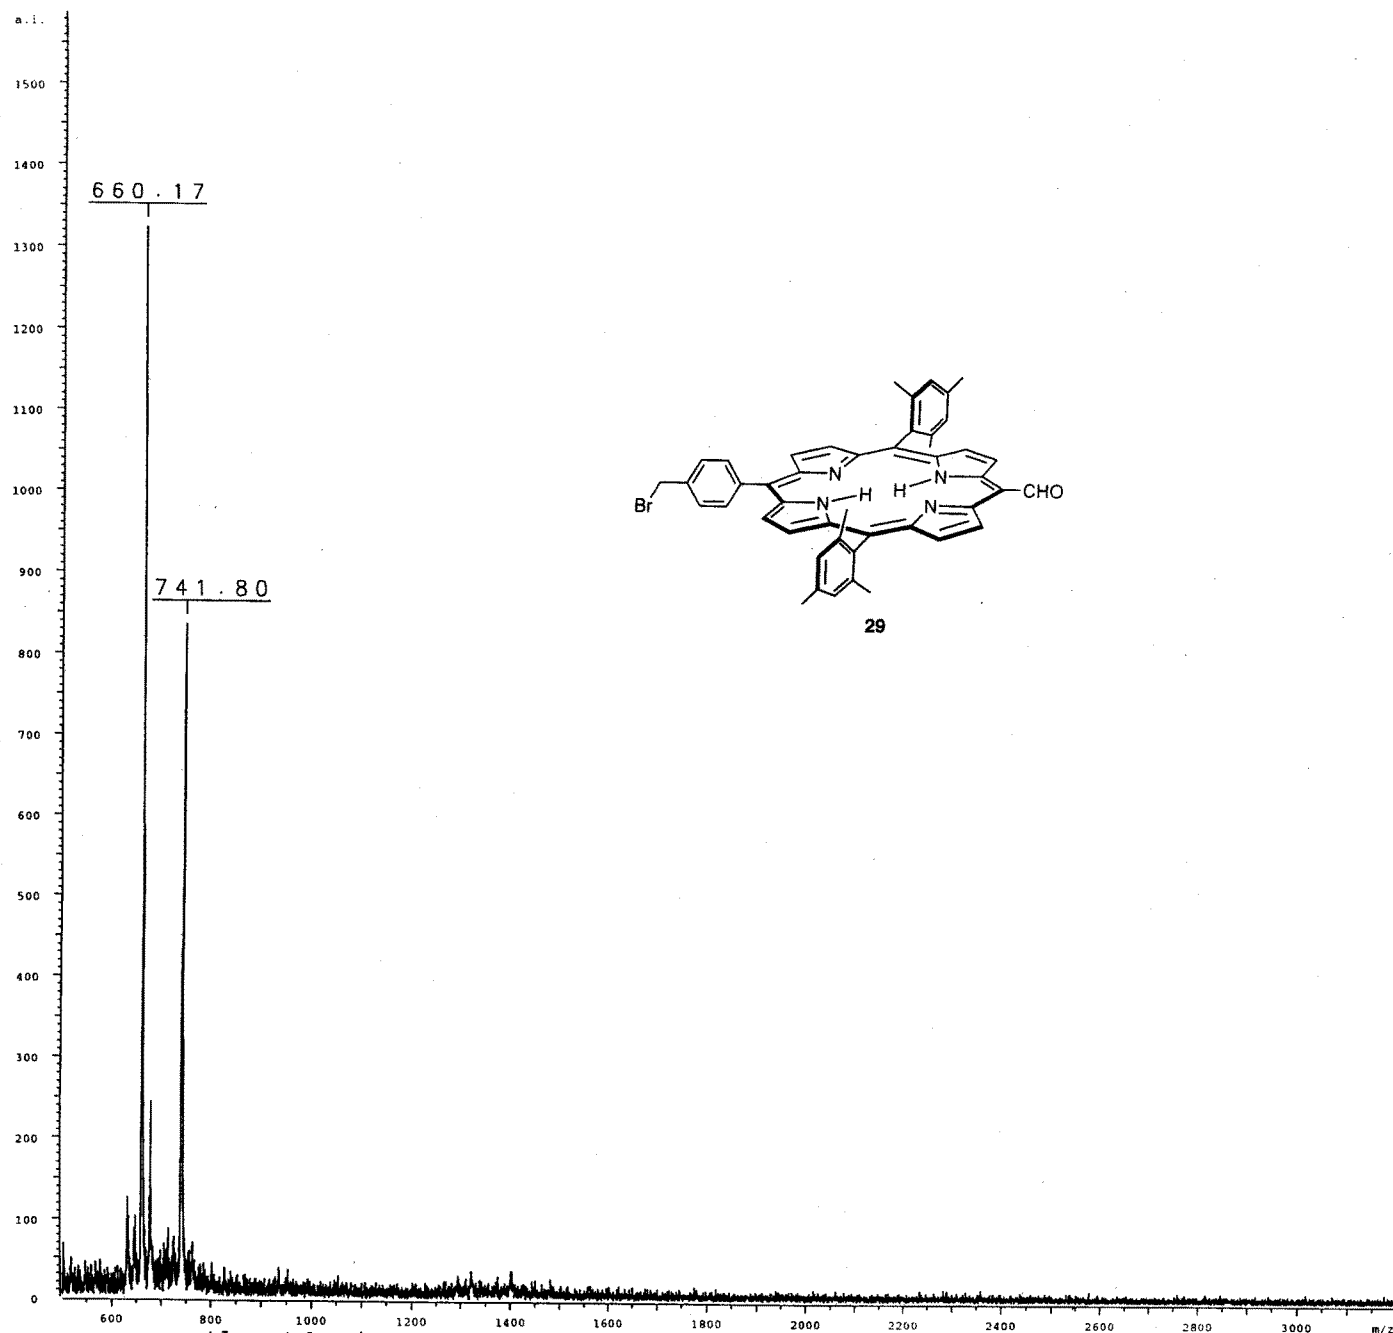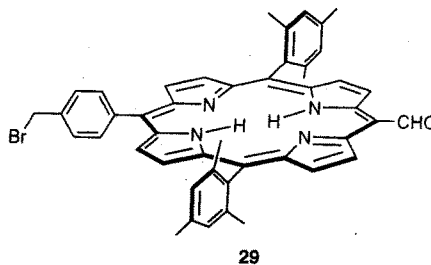

```

INSTRUM TOP
OpId N. Srinivasan
SMPNAM 020777
AQ_DATE Mon Jul 1 13:06:20 2002
PATH /data/chemistry/LINDSEY/MALYNOVSKYY
POLARI POS
AQOP_m Reflector
TD 40000
NoSHOTS 25
SMONUM 0
SMOPTS1 0
SMOPTS2 0
SMOPTS3 0
DW 1.00 [ns]
DELAY 0 [ns]
Uis1 20.00 [kV]
Uis2 18.70 [kV]
Uref1 0.00 [kV]
Ulen5 7.50 [kV]
Uhimass 10.00 [kV]
RefFull 0.00 [kV]
UdetL 1.50 [kV]
UdetR 0.00 [kV]
Udef1 2.00 [kV]
REPHZ 1.00 [Hz]
ATTEN 10.0
ML1 2067125.193
ML2 331.982
ML3 0.000
HITURBO no
GDEON yes
GDECLY short
DEFLON no
RLNSBND no
LLNSBND no
UIS2BND no
DPCALL 510.84
DPMASS 700.00 [Da]
RENOVAL 0.33
LBNDVAL 0.28
IS2BNDV 0.91
CMT1 pbr3 reaction
CMT2
  
```

/data/chemistry/LINDSEY/MALYNOVSKYY/020777/1<sup>st</sup>Ref/pdata/1    tof    Mon Jul 1 13:06:57 2002

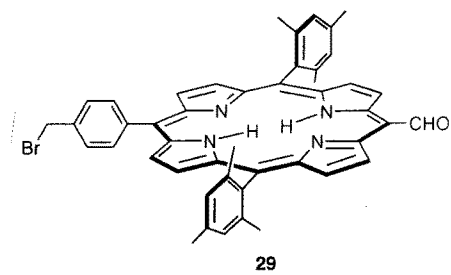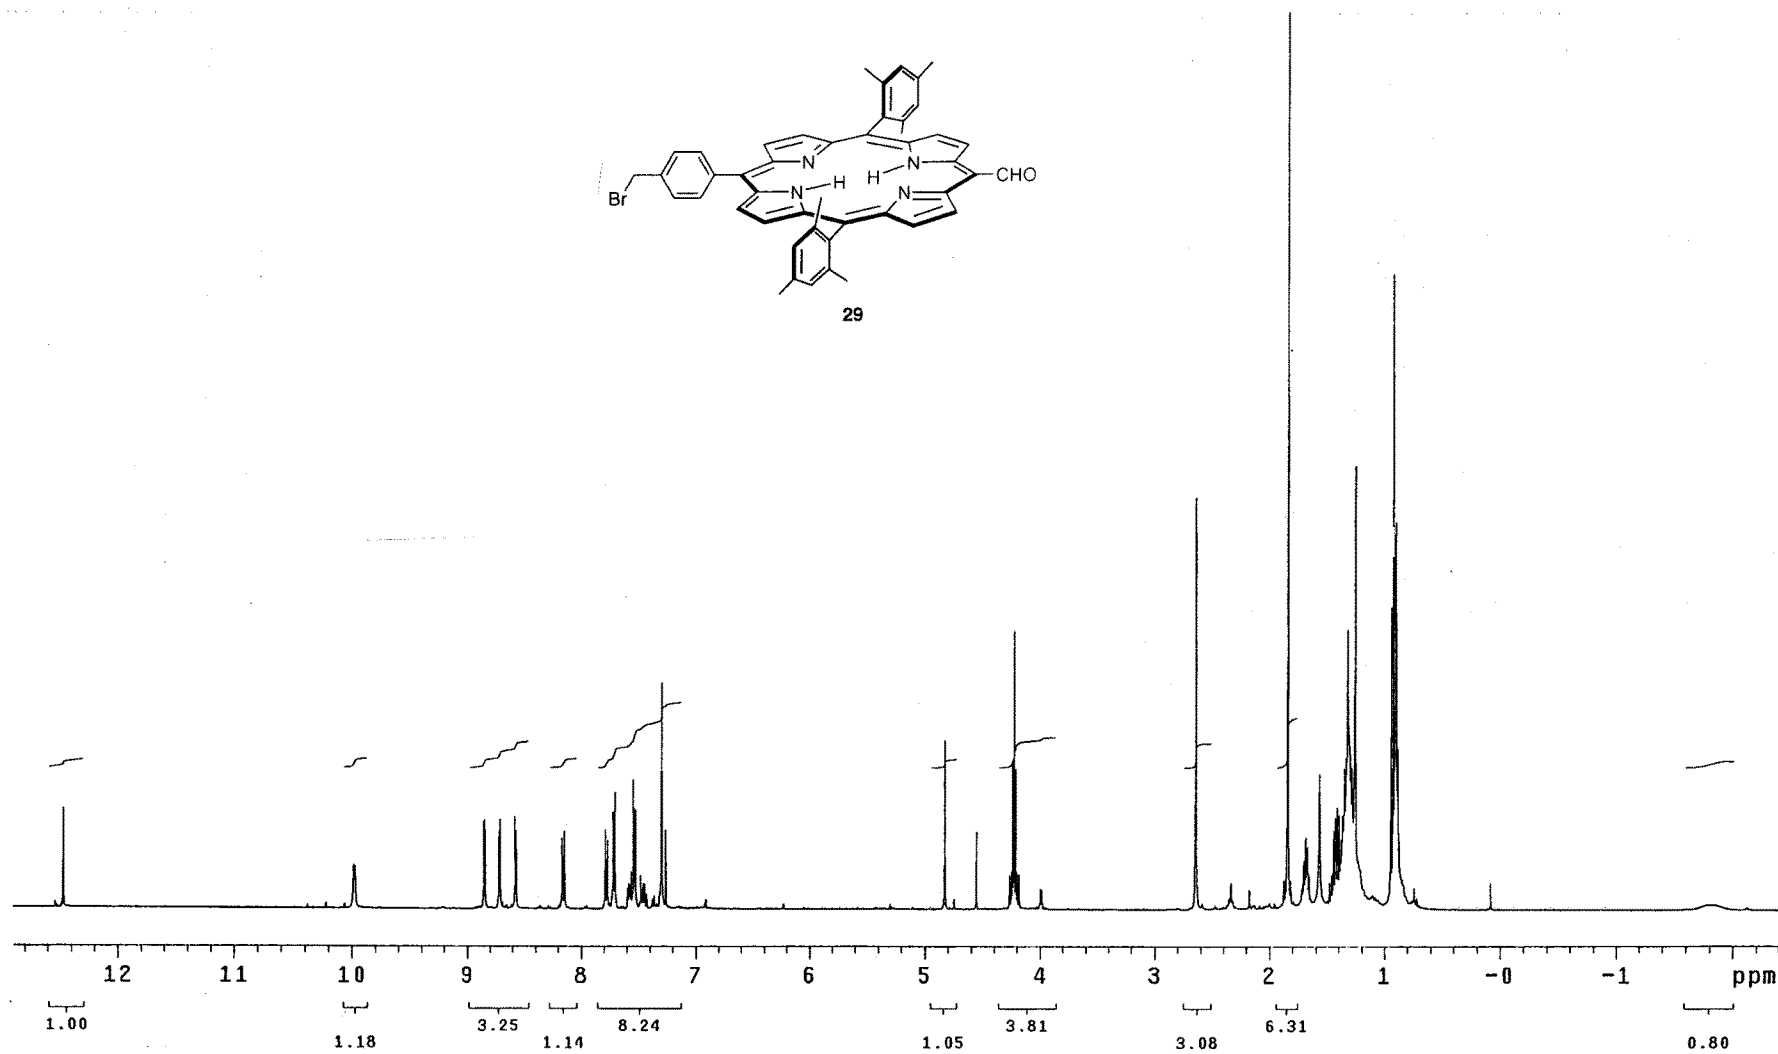

Supplement: Supplementary file 1 [file 5161807]
